# Supplementary material for: Molecular characterization of early breast cancer onset to understand disease phenotypes in African patients
Source: Med Oncol. 2022 Nov 9;40(1):13. doi: 10.1007/s12032-022-01877-8 (PMC9646617; doi:10.1007/s12032-022-01877-8)
Supplement: Supplementary file 2 — Supplementary file2 (XLSX 75 kb) [file 12032_2022_1877_MOESM2_ESM.xlsx]

## Sheet: Tabelle1
GeneSymbol	Chr	Start	End	Abberation	q.value
TINAGL1	1	32042116	32053288	0	0.0138282
GRIK3	1	37261128	37499730	0	0.146074
BEND5	1	49193195	49242641	0	0.146074
ELAVL4	1	50513686	50669458	0	0.146074
HMGB1P45	1	50864497	50865445	0	0.146074
C1orf185	1	51567906	51613752	0	0.146074
ACOT11	1	55007930	55104865	0	0.146074
PRKAA2	1	57110995	57181008	0	0.146074
C1orf168	1	57184477	57285369	0	0.146074
C8A	1	57320479	57383894	0	0.146074
LINC01135	1	59250823	59365384	0	0.0379657
NFIA	1	61330931	61928465	0	0.146074
RNU6-1177P	1	62318171	62318274	0	0.146074
PIGPP2	1	62654803	62655625	0	0.146074
RPS15AP7	1	62656194	62656598	0	0.146074
L1TD1	1	62660503	62678000	0	0.146074
KANK4	1	62702651	62785085	0	0.146074
USP1	1	62901968	62917475	0	0.146074
MRPS21P1	1	65558075	65558297	0	0.0379657
AK4	1	65613232	65697828	0	0.0379657
SGIP1	1	66999066	67213982	0	0.0379657
WDR78	1	67278568	67390570	0	0.0379657
HNRNPCP9	1	68125838	68126696	0	0.0138282
GNG12-AS1	1	68297986	68668670	0	0.0138282
ZRANB2-AS2	1	71547007	71955652	0	0.0138282
ACADM	1	76190036	76253260	0	0.0379657
PIGK	1	77554675	77685115	0	0.0138282
FUBP1	1	78409740	78444794	0	0.0138282
DNAJB4	1	78444859	78483648	0	0.0138282
GIPC2	1	78445226	78604133	0	0.0138282
RNU6-1102P	1	78554672	78554767	0	0.0138282
RNA5SP22	1	78560491	78560599	0	0.0138282
RNFT1P2	1	78636165	78636921	0	0.0138282
PTGFR	1	78769568	79005434	0	0.0138282
RNA5SP23	1	78840849	78840953	0	0.0138282
ADH5P2	1	79986765	79987888	0	0.0379657
LPHN2	1	81771845	82458120	0	0.0138282
TTLL7	1	84330711	84464833	0	0.0138282
PRKACB	1	84543745	84704181	0	0.0138282
CLCA4	1	87012761	87046437	0	0.000685573
PKN2	1	89149905	89301938	0	1.3e-05
GBP1	1	89518002	89531043	0	1.3e-05
CAPNS1P1	1	89859592	89860224	0	1.3e-05
GBP1P1	1	89873238	89891802	0	1.3e-05
LRRC8B	1	89990395	90063423	0	1.3e-05
ZNF644	1	91380859	91487829	0	1.3e-05
BTBD8	1	92545862	92613393	0	0
GAPDHP46	1	92580360	92581353	0	0
FAM69A	1	93307724	93427057	0	0
BCAR3	1	94027347	94312706	0	0
LINC01057	1	95104017	95285837	0	0
TMEM56-RWDD3	1	95583479	95712781	0	0
DPYD-IT1	1	97859710	97885697	0	0
SNX7	1	99127236	99226056	0	1.3e-05
VCAM1	1	101185298	101204601	0	1.3e-05
EXTL2	1	101337943	101361554	0	1.3e-05
DPH5	1	101455179	101491644	0	1.3e-05
COL11A1	1	103342023	103574052	0	1.3e-05
PRPF38B	1	109234945	109244425	0	0.0138282
STXBP3	1	109289296	109352148	0	0.00427106
KIAA1324	1	109656301	109749401	0	0.0138282
PSMA5	1	109941653	109969062	0	0.0138282
AHCYL1	1	110527308	110566357	0	0.000685573
SLC6A17	1	110693108	110744824	0	0.000685573
CEPT1	1	111682249	111727724	0	0.000685573
FAM212B	1	112223252	112298446	0	0.00427106
KCND3	1	112313284	112531777	0	0.00427106
TXNP3	1	112905903	112906203	0	0.00427106
WNT2B	1	113009163	113072787	0	0.000685573
ST7L	1	113066140	113163447	0	0.000685573
CAPZA1	1	113161795	113214241	0	0.000685573
MRPL53P1	1	113168528	113168846	0	0.000685573
RNU7-70P	1	113177341	113177406	0	0.000685573
MOV10	1	113215763	113243368	0	0.000685573
RHOC	1	113243728	113250056	0	0.000685573
PPM1J	1	113252616	113258099	0	0.000685573
FAM19A3	1	113263041	113269857	0	0.000685573
LRIG2	1	113615831	113674882	0	0.00427106
PKMP1	1	115078616	115080461	0	0.0138282
AMPD1	1	115215719	115238239	0	0.0138282
LINC00693	3	28616282	28799831	0	0.107554
THRAP3P1	3	31494324	31497386	0	0.107554
STT3B	3	31574130	31679112	0	0.107554
OSBPL10	3	31699382	32119072	0	0.107554
OSBPL10-AS1	3	31745550	31763144	0	0.107554
ZNF587P1	3	31835962	31837667	0	0.107554
ZNF860	3	32023263	32033120	0	0.107554
RPL21P40	3	32071688	32072170	0	0.107554
NIFKP7	3	32105466	32108103	0	0.107554
GPD1L	3	32147181	32210205	0	0.107554
CMTM8	3	32280171	32411817	0	0.107554
KRT18P15	3	32300432	32301722	0	0.107554
CMTM6	3	32522804	32544900	0	0.107554
DYNC1LI1	3	32567463	32612366	0	0.107554
IGBP1P3	3	32662395	32663394	0	0.107554
RPL30P4	3	32676714	32677046	0	0.107554
CNOT10	3	32726637	32815367	0	0.107554
CNOT10-AS1	3	32772127	32778946	0	0.107554
SUGT1P2	3	32794402	32795393	0	0.107554
CCR4	3	32993066	32997841	0	0.0138897
GLB1	3	33038100	33138722	0	0.0138897
SEC13P1	3	33075355	33076302	0	0.0138897
SUMO2P10	3	33118696	33118983	0	0.0138897
TMPPE	3	33131913	33138293	0	0.0138897
RN7SL296P	3	33144500	33144796	0	0.0138897
CRTAP	3	33155471	33189265	0	0.0138897
SUSD5	3	33191537	33260707	0	0.0138897
RNU7-110P	3	33455642	33455703	0	0.0138897
RNA5SP128	3	33533475	33533590	0	0.0138897
CLASP2	3	33537737	33759848	0	0.0138897
COX6CP10	3	33596128	33596351	0	0.0138897
SDAD1P3	3	33813455	33813787	0	0.0138897
PDCD6IP	3	33839844	33911194	0	0.0138897
FECHP1	3	34914133	34915346	0	0.00222744
KRT8P18	3	35257197	35258641	0	0.00222744
RNU6-243P	3	35298332	35298438	0	0.00222744
MIR128-2	3	35785968	35786051	0	0.00222744
RFC3P1	3	36211259	36211940	0	0.00222744
STAC	3	36421836	36589499	0	0.00222744
NBPF21P	3	36657498	36678949	0	0.00222744
RN7SKP227	3	36726531	36726860	0	0.00222744
DCLK3	3	36753913	36781352	0	0.00222744
HSPD1P6	3	36808608	36825658	0	0.0138897
TRANK1	3	36868311	36986548	0	0.0138897
RNU6ATAC4P	3	37009682	37009807	0	0.0138897
PRADC1P1	3	37017807	37018331	0	0.0138897
EPM2AIP1	3	37027357	37034795	0	0.0138897
MLH1	3	37034823	37107380	0	0.0138897
RPL29P11	3	37058011	37058505	0	0.0138897
LRRFIP2	3	37094117	37225180	0	0.0138897
UBE2D3P2	3	37176149	37176593	0	0.0138897
RNU6-1301P	3	37181818	37181921	0	0.0138897
UBE2FP1	3	37185003	37185449	0	0.0138897
GOLGA4	3	37284668	37408242	0	0.0138897
TCEA1P2	3	37317087	37318089	0	0.0138897
RNA5SP129	3	37383140	37383257	0	0.0138897
C3orf35	3	37427760	37476988	0	0.0138897
MIR26A1	3	38010895	38010971	0	0.0138897
VILL	3	38029550	38048679	0	0.0138897
SLC22A14	3	38323785	38360066	0	0.00222744
WDR48	3	39093489	39138155	0	0.00222744
MOBP	3	39508689	39570970	0	0.00222744
ENTPD3-AS1	3	40355293	40494820	0	0.000680652
ENTPD3	3	40428647	40470110	0	0.000680652
ZNF619	3	40518604	40531727	0	0.000680652
CTNNB1	3	41236328	41301587	0	0.000680652
TRAK1	3	42055294	42267381	0	0.000179676
ANO10	3	43396351	43733086	0	0
CNTN3	3	74311719	74570291	0	0
MRPS17P3	3	78574251	78574635	0	0.107554
PLSCR2	3	146109208	146213778	1	0.0790196
ZIC4	3	147103833	147124647	1	0.0790196
ZIC4-AS1	3	147104754	147105240	1	0.0790196
ZIC1	3	147111209	147228080	1	0.0790196
NPM1P28	3	147308783	147309622	1	0.0790196
HMGB1P30	3	148542569	148543174	1	0.0790196
CPA3	3	148583043	148614983	1	0.0790196
UBQLN4P1	3	148703655	148705455	1	0.0790196
GYG1	3	148709128	148745419	1	0.0790196
HLTF	3	148747914	148804341	1	0.0790196
HPS3	3	148847371	148891519	1	0.0790196
CP	3	148880197	148939842	1	0.0790196
TM4SF4	3	149191761	149221068	1	0.0790196
ANKUB1	3	149478892	149686172	1	0.0790196
FAM194A	3	150377672	150421758	1	0.00461076
SIAH2	3	150458914	150481264	1	0.00461076
SIAH2-AS1	3	150479724	150480325	1	0.00461076
MED12L	3	150803484	151154860	1	0.0121376
RNA5SP145	3	150905886	150906010	1	0.0121376
GPR171	3	150915619	150920988	1	0.0121376
P2RY14	3	150929905	150996255	1	0.0121376
SETP11	3	150987228	150987917	1	0.0121376
GPR87	3	151011891	151034740	1	0.0121376
P2RY13	3	151044100	151047336	1	0.0121376
P2RY12	3	151055168	151102600	1	0.0121376
IGSF10	3	151143172	151176497	1	0.0121376
MRPL42P6	3	151193592	151193962	1	0.0121376
MIR5186	3	151283664	151283783	1	0.0121376
AADACL2	3	151451704	151479127	1	0.0121376
AADAC	3	151531825	151546276	1	0.0121376
SUCNR1	3	151591431	151602405	1	0.0121376
RPL21P42	3	153741624	153742087	1	0.00461076
ARHGEF26	3	153838792	153975616	1	0.0121376
DHX36	3	153990335	154042286	1	0.0121376
GPR149	3	154055461	154147504	1	0.0121376
DDX50P2	3	154069925	154072588	1	0.0121376
RPL9P15	3	154394377	154394908	1	0.0121376
MME-AS1	3	154876530	154901074	1	0.000433806
PABPC1P10	3	155027216	155027596	1	0.000433806
PLCH1	3	155093369	155462856	1	0.000433806
PLCH1-AS1	3	155166973	155175542	1	0.000433806
PLCH1-AS2	3	155203592	155204910	1	0.000433806
RPL6P7	3	155375549	155376401	1	0.000433806
C3orf33	3	155480401	155524140	1	0.000433806
SLC33A1	3	155538813	155572218	1	0.000433806
GMPS	3	155588325	155661815	1	0.000433806
SETP14	3	155705093	155705965	1	0.000433806
VN2R1P	3	155737435	155755475	1	0.000433806
KCNAB1	3	155755490	156256545	1	0.000433806
ALG1L15P	3	155761944	155762737	1	0.000433806
KCNAB1-AS2	3	155933349	155945672	1	0.000433806
KCNAB1-AS1	3	156158946	156164694	1	0.000433806
TIPARP-AS1	3	156389651	156392167	1	0.000433806
TIPARP	3	156391024	156424559	1	0.000433806
METTL15P1	3	156431673	156432717	1	0.000433806
LINC00886	3	156465135	156534851	1	0.000433806
PA2G4P4	3	156527340	156528521	1	0.000433806
LEKR1	3	156543270	156763918	1	0.000433806
KLF3P2	3	156695347	156695614	1	0.000433806
RN7SKP177	3	156735131	156735485	1	0.000433806
LINC00880	3	156799456	156840793	1	0.000433806
LINC00881	3	156807670	156818924	1	0.000433806
CCNL1	3	156864297	156878549	1	0.000433806
KRT18P34	3	156880452	156881721	1	0.000433806
RNA5SP146	3	156891707	156891829	1	0.000433806
VEPH1	3	156977531	157251408	1	0.000433806
PTX3	3	157154578	157161417	1	0.000433806
C3orf55	3	157261035	157395538	1	0.000433806
RN7SKP46	3	157648281	157648514	1	0.000433806
SHOX2	3	157814948	157824292	1	0.000433806
MLF1	3	158288952	158325041	1	0.000433806
MTAPP1	3	158327399	158328646	1	0.000433806
GFM1	3	158362067	158410364	1	0.000433806
LXN	3	158363611	158390482	1	0.000433806
RARRES1	3	158414681	158450485	1	0.000433806
GPR79	3	158558788	158559873	1	0.000160049
IQCJ	3	158680717	158984096	1	0.000160049
MIR3919	3	159000435	159000523	1	0.000160049
IFT80	3	159974774	160117668	1	0.000433806
PPM1L	3	160473390	160796695	1	0.000433806
NMD3	3	160822484	160971320	1	0.000433806
CT64	3	162845711	163079351	1	0.000160049
ZBBX	3	166958075	167099134	1	0
SERPINI2	3	167159577	167196792	1	0
WDR49	3	167196472	167371771	1	0
SERPINI1	3	167453031	167543356	1	0
HMGN2P26	3	167676532	167676870	1	0
GOLIM4	3	167726465	167813763	1	0
EGFEM1P	3	167967310	168548387	1	0
PLD1	3	171318195	171528740	1	0
FNDC3B	3	171757418	172119455	1	0
NCEH1	3	172348039	172429008	1	0
SPATA16	3	172607148	172859058	1	0
NLGN1	3	173114074	174004434	1	0
NLGN1-AS1	3	173628288	173638586	1	0
RN7SKP234	3	173775431	173775654	1	0
NAALADL2-AS3	3	174797097	174833032	1	0
TBL1XR1	3	176737143	176915261	1	0
MFN1	3	179065480	179112719	1	0
PEX5L	3	179512746	179754841	1	0
GAPDHP36	3	179918924	179930896	1	0
TTC14	3	180319918	180335616	1	0
CCDC39	3	180320646	180588793	1	0
RN7SL229P	3	180454196	180454491	1	0
EIF2B5	3	183852826	184402546	1	0.000433806
AP2M1	3	183892477	183901879	1	0.000433806
EIF4G1	3	184032283	184053146	1	0.000433806
EHHADH	3	184908412	184999778	1	0.000433806
MAP3K13	3	185000729	185206885	1	0.000433806
SENP2	3	185300284	185351339	1	0.000433806
FETUB	3	186353758	186370930	1	0.0121376
LPP-AS1	3	188280026	188286454	1	0.000433806
LINC00884	3	194208183	194239008	1	0.000433806
ACAP2	3	194995465	195163807	1	0.000433806
TFRC	3	195754054	195809060	1	0.000433806
RNU7-18P	3	195799690	195799751	1	0.000433806
SLC51A	3	195938358	195970049	1	0.000160049
UBXN7	3	196074533	196159345	1	0.000433806
RN7SL671P	4	1870787	1871064	0	0.148001
WHSC1	4	1873151	1983934	0	0.148001
SCARNA22	4	1976363	1976487	0	0.148001
MIR943	4	1988111	1988204	0	0.148001
HTT	4	3076408	3245676	0	0.148001
MSANTD1	4	3246096	3273465	0	0.148001
RGS12	4	3294755	3441640	0	0.148001
STX18	4	4417469	4544073	0	0.00430509
STX18-IT1	4	4477848	4483427	0	0.00430509
EVC	4	5712924	5830772	0	0.00130969
CRMP1	4	5749811	5894785	0	0.00130969
JAKMIP1	4	6027926	6202318	0	0.00130969
MAN2B2	4	6576902	6625089	0	0.00130969
CPZ	4	8594387	8621488	0	0.00430509
RAB28	4	13362978	13485989	0	0.00130969
CC2D2A	4	15471489	15603180	0	0.00430509
FBXL5	4	15606162	15683302	0	0.00430509
PROM1	4	15964699	16086001	0	0.00130969
TAPT1-AS1	4	16228286	16321763	0	0.00130969
LCORL	4	17842822	18023499	0	0.00430509
SLIT2	4	20254883	20622184	0	0.00130969
RNU6-420P	4	22120606	22120712	0	0.0578374
GPR125	4	22346694	22517677	0	0.00430509
GBA3	4	22694537	22821198	0	0.00130969
CDC42P6	4	22728998	22729573	0	0.00130969
RFPL4AP3	4	23516563	23516907	0	0.00130969
PPARGC1A	4	23756664	23905712	0	0.00130969
CCDC149	4	24807739	24981826	0	0.00130969
LGI2	4	25000469	25032501	0	0.00130969
SEL1L3	4	25749055	25865382	0	0.00430509
RBPJ	4	26165077	26436541	0	0.00430509
TBC1D19	4	26578059	26756973	0	0.00430509
RNU6-1221P	4	29512257	29512359	0	0.148001
EEF1A1P21	4	29750379	29751722	0	0.148001
RPS3AP17	4	29964266	29965380	0	0.148001
IL8	4	74606223	74609433	1	0.0665604
CXCL5	4	74861359	74864496	1	0.0665604
RN7SL218P	4	74877295	74877595	1	0.0665604
CXCL3	4	74902306	74904524	1	0.0665604
PPBPP2	4	74919755	74921116	1	0.0665604
CXCL2	4	74962752	74965010	1	0.0665604
EPGN	4	75174190	75181024	1	0.0665604
EREG	4	75230860	75254468	1	0.0665604
AREG	4	75310851	75320726	1	0.0665604
AREGB	4	75480629	75490486	1	0.0665604
RCHY1	4	76404247	76439974	1	0.0665604
THAP6	4	76439156	76475683	1	0.0665604
C4orf26	4	76481258	76491095	1	0.0665604
CDKL2	4	76503215	76555900	1	0.0665604
G3BP2	4	76567966	76649709	1	0.0665604
USO1	4	76649777	76735382	1	0.0665604
RNU2-16P	4	76750607	76750742	1	0.0665604
PPEF2	4	76781020	76823724	1	0.0665604
NAAA	4	76831809	76862204	1	0.0665604
SDAD1	4	76862103	76912115	1	0.0665604
CXCL9	4	76922428	76928641	1	0.0665604
ART3	4	76932337	77033955	1	0.0665604
CXCL10	4	76942273	76944650	1	0.0665604
CXCL11	4	76954835	76962568	1	0.0665604
NUP54	4	77035812	77069668	1	0.0665604
SCARB2	4	77079890	77135046	1	0.0665604
LINC01020	5	5034472	5070117	1	0.000159365
ADAMTS16	5	5140443	5320417	1	0.000159365
ADCY2	5	7396321	7830194	1	0.000159365
C5orf49	5	7830491	7851603	1	0.000159365
MTRR	5	7851299	7906138	1	0.000159365
MIR4458HG	5	8450856	8463208	1	0.000159365
CT49	5	12574969	12804475	1	0.000159365
RPS23P5	5	13250347	13250774	1	0.000159365
TRIO	5	14143811	14532235	1	0.000159365
FAM105A	5	14581884	14615116	1	0.000159365
FAM105B	5	14664773	14699820	1	0.000159365
ANKH	5	14704910	14871887	1	0.000159365
HNRNPKP5	5	14877776	14878028	1	0.000159365
MARCH11	5	16067248	16180871	1	0.000159365
BASP1	5	17065707	17276943	1	0.000819552
CDH12	5	21750782	22853731	1	0.000819552
RNU6-909P	5	28624764	28624870	1	0.00655375
CDH6	5	31193857	31329253	1	0.000819552
RXFP3	5	33936491	33939023	1	0.00655375
RAI14	5	34656342	34832732	1	0.0260667
SPEF2	5	35617946	35814713	1	0.00655375
SLC1A3	5	36606457	36688436	1	0.0260667
EGFLAM	5	38258511	38465123	1	0.0260667
LIFR	5	38475065	38608456	1	0.0260667
RNU6-381P	5	44066726	44066833	1	0.0260667
FGF10-AS1	5	44388834	44414091	1	0.00655375
MRPS30	5	44809027	44820530	1	0.0260667
LINC01033	5	53616774	53710955	0	0.0992961
GZMA	5	54398476	54406080	0	0.00681755
DDX4	5	55033845	55112985	0	0.00681755
IL31RA	5	55147207	55218678	0	0.00681755
ANKRD55	5	55395507	55529186	0	0.00681755
GPBP1	5	56469775	56560506	0	0.000174872
ELOVL7	5	60047618	60140216	0	0.00120793
CWC27	5	64064757	64314590	0	6.53e-05
ERBB2IP	5	65222303	65378377	0	6.53e-05
SREK1	5	65435799	65479443	0	6.53e-05
VWA8P1	5	68150737	68150912	0	0.000174872
PMCHL2	5	70671613	70681820	0	0.000174872
BDP1	5	70751442	70863649	0	0.000174872
MCCC2	5	70883115	70954531	0	0.000174872
MRPS27	5	71515236	71616473	0	0.000174872
PTCD2	5	71616194	71656052	0	0.000174872
ZNF366	5	71738479	71803554	0	0.000174872
TNPO1	5	72112139	72212560	0	0.000174872
FCHO2	5	72251808	72386349	0	0.000174872
TMEM171	5	72416119	72427644	0	0.000174872
HEXB	5	73935848	74018472	0	0.000174872
ANKRD31	5	74364100	74532703	0	0.00120793
SV2C	5	75378997	75649764	0	0.00120793
F2R	5	76011868	76031606	0	0.00120793
CRHBP	5	76248538	76276983	0	0.000174872
WDR41	5	76721795	76916436	0	6.53e-05
TBCA	5	76986991	77164604	0	6.53e-05
LHFPL2	5	77781038	78065844	0	6.53e-05
ARSB	5	78073032	78281910	0	6.53e-05
BHMT2	5	78365540	78385289	0	6.53e-05
BHMT	5	78407602	78428108	0	6.53e-05
HOMER1	5	78668459	78810040	0	0.000174872
PAPD4	5	78907943	78982471	0	0.000174872
CMYA5	5	78985700	79096063	0	0.000174872
MTX3	5	79275584	79287082	0	0.000174872
THBS4	5	79287134	79379110	0	0.000174872
RASGRF2	5	80256491	80525975	0	0.0157645
LINC00461	5	87803363	87986858	0	0.00681755
MEF2C	5	88013975	88199922	0	0.00681755
MEF2C-AS1	5	88179145	88762215	0	0.00681755
MBLAC2	5	89754020	89770585	0	0.00681755
POLR3G	5	89767565	89810370	0	0.00681755
ARSK	5	94890778	94940768	0	0.0992961
EFNA5	5	106712590	107006596	0	0.0157645
TMEM232	5	109624934	110074657	0	0.0157645
HMGN1P13	5	110907799	110907936	0	0.0157645
NREP	5	110998318	111333161	0	0.0992961
EPB41L4A	5	111478138	111755013	0	0.0992961
APC	5	112043195	112181936	0	0.0992961
CBX3P3	5	112113327	112113858	0	0.0992961
XBP1P1	5	112220791	112221442	0	0.0992961
TSSK1B	5	112768251	112770728	0	0.0157645
RNU4ATAC13P	5	112829532	112829657	0	0.0157645
YTHDC2	5	112849380	112930982	0	0.0157645
TRIM36	5	114460459	114516243	0	0.0992961
PGGT1B	5	114546527	114598569	0	0.0992961
HMGN1P15	5	114624733	114625027	0	0.0992961
TMEM14B	6	10747992	10852986	1	0.0859824
MAK	6	10762956	10838764	1	0.0859824
NEDD9	6	11183531	11382581	1	0.0859824
KDM1B	6	18155560	18224084	1	0.0859824
DEK	6	18224099	18265054	1	0.0859824
RNF144B	6	18368779	18469105	1	0.0859824
CDKAL1	6	20534688	21232635	1	0.0859824
NRSN1	6	24126350	24155128	1	0.0859824
HMGN3-AS1	6	79943435	79946514	0	0.0170384
ME1	6	83920108	84140797	0	0.00426488
DUTP5	6	86136375	86136843	0	0.00426488
SYNCRIP	6	86318053	86353510	0	0.00426488
RPL7P27	6	86796133	86796852	0	0.00426488
ORC3	6	88299839	88377169	0	0.00426488
MMS22L	6	97590037	97731093	0	0.069631
HS3ST5	6	114376750	114664209	0	0.0170384
HSPD1P16	6	153026870	153027263	0	0.0170384
TUBB4BP7	6	153219182	153220415	0	0.069631
FBXO5	6	153291664	153304714	0	0.069631
MTRF1L	6	153308497	153323820	0	0.069631
RGS17	6	153325594	153452384	0	0.069631
RNA5SP224	6	153480355	153480480	0	0.069631
RNA5SP225	6	153741573	153741707	0	0.069631
MTND4P13	6	153990014	153991036	0	0.0170384
NOX3	6	155716504	155777037	0	0.069631
RNU7-152P	6	155976097	155976160	0	0.069631
SERAC1	6	158530536	158589312	0	0.0170384
TULP4	6	158733692	158932860	0	0.00426488
SOD2	6	160090089	160183561	0	0.00426488
HNRNPH1P1	6	160133833	160135017	0	0.00426488
TCP1	6	160199530	160210781	0	0.00426488
LPAL2	6	160874460	160932156	0	0.0170384
PLG	6	161123270	161174347	0	0.0170384
PACRG	6	163148164	163736524	0	0
QKI	6	163835032	163999628	0	0
TCP10L2	6	167559902	167610401	0	0
GPR31	6	167569759	167571817	0	0
UNC93A	6	167684657	167729507	0	0
TTLL2	6	167738574	167772991	0	0
TCP10	6	167770521	167797998	0	0
C6orf123	6	168185217	168197539	0	0
MLLT4-AS1	6	168224556	168227389	0	0
TCTE3	6	170140210	170151655	0	0
FABP5P3	7	152133980	152140272	0	0.017702
CCT8L1P	7	152142562	152144235	0	0.017702
LINC01003	7	152160871	152162634	0	0.017702
RNA5SP250	7	152290058	152290176	0	0.017702
XRCC2	7	152341864	152373250	0	0.017702
RN7SL811P	7	152435527	152435815	0	0.017702
ATP5F1P3	7	152446164	152446820	0	0.017702
RN7SL845P	7	152454747	152455034	0	0.017702
ACTR3B	7	152456834	152552463	0	0.017702
PAXIP1-AS2	7	154720208	154741618	0	0.0318717
PAXIP1	7	154735397	154794794	0	0.0318717
PAXIP1-AS1	7	154795158	154797413	0	0.0318717
HTR5A-AS1	7	154858777	154863267	0	0.0318717
HTR5A	7	154862034	154877459	0	0.0318717
RN7SKP280	7	154973591	154973894	0	0.017702
INSIG1	7	155089486	155101945	0	0.0318717
BLACE	7	155149680	155160629	0	0.0318717
EN2	7	155250824	155257526	0	0.0765746
CNPY1	7	155266901	155326557	0	0.0765746
RBM33	7	155437145	155574179	0	0.0765746
SHH	7	155592680	155604967	0	0.0318717
RN7SL142P	7	157098487	157098765	0	0.0765746
DNAJB6	7	157128075	157210133	0	0.0765746
MIR153-2	7	157367028	157367114	0	0.0765746
RNA5SP264	8	36621963	36622069	0	0.00521531
TPT1P8	8	36746000	36746825	0	0.103035
SBSPON	8	73976775	74036323	1	0.0146039
UBE2W	8	74692332	74791145	1	0.0327213
PI15	8	75736772	75767264	1	0.0753579
SMARCA2	9	2015342	2193624	0	0.111067
CARM1P1	9	2907073	3053408	1	0.0151487
RFX3	9	3218297	3526004	1	0.0643245
GLIS3	9	3824127	4348392	1	0.0643245
GLIS3	9	3824127	4348392	0	0.111067
GLIS3-AS1	9	3898642	3901248	1	0.0643245
GLIS3-AS1	9	3898642	3901248	0	0.111067
SPATA6L	9	4553386	4666674	1	0.0643245
SPATA6L	9	4553386	4666674	0	0.111067
CDC37L1	9	4679559	4708398	1	0.0643245
CDC37L1	9	4679559	4708398	0	0.111067
MTND6P5	9	5091093	5091604	1	0.0643245
MTND1P11	9	5094139	5095014	1	0.0643245
MTND4P14	9	5107937	5109290	1	0.0643245
MTND5P14	9	5109496	5110762	1	0.0643245
IGHEP2	9	5113549	5114804	1	0.0643245
INSL6	9	5131979	5185668	1	0.0643245
PLGRKT	9	5357973	5437878	1	0.0151487
KIAA2026	9	5881596	6007901	1	0.0643245
IL33	9	6215805	6257983	1	0.0643245
TPD52L3	9	6328349	6331900	1	0.0643245
UHRF2	9	6413151	6507054	1	0.0643245
C9orf38	9	6467618	6470375	1	0.0643245
GLDC	9	6532464	6645650	1	0.0643245
RN7SL25P	9	6542094	6542350	1	0.0643245
RN7SL123P	9	6661651	6661936	1	0.0643245
RNF2P1	9	6668999	6670008	1	0.0643245
KDM4C	9	6720863	7175648	1	0.0643245
SNRPEP2	9	6748703	6748981	1	0.0643245
RPL4P5	9	7477045	7478320	1	0.0643245
RPL4P5	9	7477045	7478320	0	0.111067
TMEM261	9	7796490	7888380	1	0.0643245
TMEM261	9	7796490	7888380	0	0.111067
SH3GL2	9	17579080	17797127	0	0.111067
PABPC1P11	9	17589159	17591316	0	0.111067
ADAMTSL1	9	18473892	18910948	0	0.111067
MIR3152	9	18573304	18573377	0	0.111067
RN7SKP258	9	18651145	18651448	0	0.111067
FAM154A	9	18927656	19033251	0	0.111067
RRAGA	9	19049372	19051019	0	0.111067
HAUS6	9	19053141	19103117	0	0.111067
SCARNA8	9	19063654	19063784	0	0.111067
RNU6-264P	9	19073841	19073944	0	0.111067
RN7SL158P	9	19106479	19106788	0	0.111067
PLIN2	9	19108373	19149288	0	0.111067
DENND4C	9	19230433	19374139	0	0.111067
RPS6	9	19375713	19380252	0	0.111067
NDUFA5P3	9	19383215	19383885	0	0.111067
ACER2	9	19408925	19452018	0	0.111067
SLC24A2	9	19507450	19786926	0	0.111067
MIR4474	9	20502263	20502340	0	0.111067
FOCAD	9	20658308	20995954	0	0.111067
MIR491	9	20716104	20716187	0	0.111067
PTPLAD2	9	20995306	21031635	0	0.111067
IFNNP1	9	21058770	21059322	0	0.111067
IFNB1	9	21077104	21077943	0	0.111067
IFNWP4	9	21106542	21106835	0	0.111067
IFNW1	9	21140631	21142144	0	0.111067
IFNA21	9	21165636	21166659	0	0.111067
MTAP	9	21802542	21931646	0	0.0742286
CDKN2B-AS1	9	21994777	22121096	0	0.0742286
ELAVL2	9	23690102	23826335	0	0.111067
RN7SKP120	9	25088809	25089149	0	0.111067
TUSC1	9	25676396	25678856	0	0.111067
RPL7AP8	10	88390582	88391385	0	0.0944352
OPN4	10	88414314	88426605	0	0.0944352
LDB3	10	88428206	88495825	0	0.0944352
BMPR1A	10	88516407	88692595	0	0.0944352
RNU1-19P	10	88649326	88649490	0	0.0944352
MMRN2	10	88695297	88729238	0	0.0944352
SNCG	10	88718375	88723017	0	0.0944352
ADIRF-AS1	10	88725102	88731068	0	0.0944352
ADIRF	10	88727949	88743691	0	0.0944352
BMS1P3	10	88752010	88760192	0	0.0944352
AGAP11	10	88752163	88769960	0	0.0944352
FAM25A	10	88780063	88784487	0	0.0944352
RNU6-529P	10	88800995	88801098	0	0.0944352
GLUD1	10	88810243	88854623	0	0.0944352
FAM35A	10	88853918	88951225	0	0.0944352
RN7SL733P	10	88913843	88914126	0	0.0944352
NUTM2A-AS1	10	88963632	89102369	0	0.0944352
NUTM2A	10	88985205	88996665	0	0.0944352
LINC00863	10	89102493	89117639	0	0.0944352
NUTM2D	10	89117425	89130452	0	0.0944352
NPAP1P3	10	89136653	89138238	0	0.0944352
CTSLP1	10	89146442	89149960	0	0.0944352
KLLN	10	89618918	89623194	0	0.000854491
LIPF	10	90424198	90438571	0	0.0944352
LIPK	10	90484301	90512543	0	0.0944352
ANKRD22	10	90581889	90611575	0	0.00436898
IFIT1	10	91152303	91163745	0	0.000854491
SLC16A12	10	91190051	91316398	0	0.000854491
PANK1	10	91342745	91405215	0	0.000854491
KIF20B	10	91461367	91534700	0	0.000854491
HECTD2	10	93170096	93274586	0	0.00436898
TNKS2-AS1	10	93542596	93558048	0	0.00436898
CPEB3	10	93806449	94050844	0	0.00106173
SDHCP2	10	93878421	93878921	0	0.00106173
EIF4A1P8	10	93896632	93898127	0	0.00106173
NHP2P1	10	93976089	93976550	0	0.00106173
MARCH5	10	94050920	94113721	0	0.00106173
MARK2P9	10	94178424	94180632	0	0.00106173
IDE	10	94211441	94333833	0	0.00106173
KIF11	10	94353043	94415150	0	0.00106173
RN7SL644P	10	94418801	94419055	0	0.00106173
EIF2S2P3	10	94428502	94429500	0	0.00106173
HHEX	10	94447945	94455403	0	0.00106173
FFAR4	10	95326422	95364237	0	0.00106173
RBP4	10	95351444	95361501	0	0.00106173
PDE6C	10	95372345	95425767	0	0.00106173
FRA10AC1	10	95427640	95462329	0	0.00106173
TBC1D12	10	96162261	96295687	0	0.00436898
CYP2C18	10	96443251	96495947	0	0.00436898
CYP2C19	10	96447911	96613017	0	0.00436898
CYP2C9	10	96698415	96749147	0	0.00436898
PDLIM1	10	96997329	97050781	0	0.00436898
TLL2	10	98124363	98273675	0	0.00436898
SLIT1	10	98757795	98945677	0	0.00436898
ARHGAP19	10	98978996	99052413	0	0.00436898
RRP12	10	99116115	99161127	0	0.00436898
EXOSC1	10	99195899	99205774	0	0.00436898
PI4K2A	10	99344131	99436191	0	0.0250001
ABCC2	10	101542489	101611949	0	0.0250001
PKD2L1	10	102047903	102090243	0	0.0250001
WNT8B	10	102222798	102243501	0	0.0250001
LZTS2	10	102756375	102767593	0	0.0250001
C10orf76	10	103605356	103815950	0	0.0250001
PPRC1	10	103892787	103910082	0	0.0250001
GBF1	10	104005289	104142656	0	0.0250001
CNNM2	10	104678050	104849978	0	0.00436898
CALHM3	10	105232561	105238997	0	0.00436898
SH3PXD2A	10	105348285	105615301	0	0.00436898
CCDC147	10	106113522	106214848	0	0.00106173
XPNPEP1	10	111624524	111683311	0	0.00106173
ADD3	10	111756126	111895323	0	0.00106173
MXI1	10	111967363	112047123	0	0.00106173
DUSP5	10	112257596	112271302	0	0.00106173
RBM20	10	112404155	112599227	0	0.00106173
NHLRC2	10	115614420	115676953	0	0.00106173
AFAP1L2	10	116054583	116164515	0	0.00436898
ABLIM1	10	116190872	116444762	0	0.00436898
FAM160B1	10	116581503	116659591	0	0.00436898
GFRA1	10	117816444	118032979	0	0.0250001
PNLIPRP2	10	118380465	118404654	0	0.0250001
SLC18A2	10	119000604	119038941	0	0.0944352
PDZD8	10	119040000	119134978	0	0.0944352
RAB11FIP2	10	119764427	119806114	0	0.0944352
GRK5	10	120967101	121215131	0	0.0250001
BAG3	10	121410882	121437331	0	0.0944352
BTBD16	10	124030821	124097677	0	0.0944352
RNU6-728P	10	124105205	124105308	0	0.0944352
PLEKHA1	10	124134212	124191867	0	0.0944352
MIR3941	10	124176481	124176583	0	0.0944352
ARMS2	10	124214169	124216868	0	0.0944352
HTRA1	10	124221041	124274424	0	0.0944352
DMBT1	10	124320181	124403252	0	0.0944352
C10orf120	10	124457225	124459338	0	0.0944352
GPR26	10	125425871	125454123	0	0.0944352
CPXM2	10	125465723	125699783	0	0.0944352
LHPP	10	126150403	126306457	0	0.0944352
FAM53B	10	126307861	126432838	0	0.0944352
CTBP2	10	126676421	126849739	0	0.0944352
MRPS21P6	10	126855246	126855506	0	0.0944352
EDRF1	10	127408084	127452712	0	0.0944352
EBF3	10	131633547	131762105	0	0.00436898
BNIP3	10	133781578	133795435	0	0.00436898
JAKMIP3	10	133918175	133998313	0	0.00436898
INPP5A	10	134351324	134596979	0	0.00106173
ECHS1	10	135175984	135187193	0	0.00106173
PELI3	11	66234216	66244808	1	0.0599186
DPP3	11	66247484	66277130	1	0.0599186
BBS1	11	66278077	66301098	1	0.0599186
ZDHHC24	11	66288108	66313709	1	0.0599186
ACTN3	11	66313866	66330800	1	0.0599186
RBM4	11	66384097	66434153	1	0.0155733
RBM14-RBM4	11	66384097	66413940	1	0.0155733
RBM4B	11	66432469	66445392	1	0.0155733
FTLP6	11	66538717	66539138	1	0.0155733
LRFN4	11	66624118	66627946	1	0.0155733
ZNF705E	11	71525091	71532594	1	0.00015296
RNF121	11	71639747	71708643	1	0.00015296
FOLR2	11	71927645	71932994	1	0.00789914
ARAP1	11	72396114	72504644	1	0
ARAP1-AS2	11	72411519	72416652	1	0
FCHSD2	11	72547790	72853306	1	0
ARHGEF17	11	73019334	73080136	1	0
RELT	11	73087309	73108519	1	0
RAB6A	11	73386683	73472182	1	0.00015296
NDUFC2-KCTD14	11	77728017	77790911	1	0
NDUFC2	11	77779350	77791265	1	0
ALG8	11	77811982	77850706	1	0
RNU6-126P	11	77844466	77844568	1	0
KCTD21	11	77882295	77899868	1	0
USP35	11	77899858	77925757	1	0
GAB2	11	77926343	78129394	1	0
NARS2	11	78147007	78285919	1	0
MIR708	11	79113066	79113153	1	0.00015296
MIR5579	11	79133213	79133270	1	0.00015296
RNU6-544P	11	80239004	80239110	1	0.0155733
SNRPGP16	11	92670607	92670832	0	0.114452
MTNR1B	11	92702886	92718232	0	0.114452
HEPHL1	11	93754527	93846917	0	0.0268498
RNU4ATAC16P	12	890299	890424	1	0.0126199
RAD52	12	1021243	1099219	1	0.0126199
ERC1	12	1099675	1605099	1	0.0126199
RN7SL852P	12	1119501	1119792	1	0.0126199
LINC00942	12	1609691	1616484	1	0.0126199
WNT5B	12	1639057	1756409	1	0.0126199
FBXL14	12	1675159	1703331	1	0.0126199
MIR3649	12	1769481	1769546	1	0.0126199
ADIPOR2	12	1797740	1897844	1	0.0126199
RPS4XP14	12	1866397	1867177	1	0.0126199
CACNA2D4	12	1901123	2028002	1	0.0126199
LRTM2	12	1929433	1945918	1	0.0126199
LINC00940	12	2038368	2045740	1	0.0126199
DCP1B	12	2055220	2113701	1	0.0126199
CACNA1C-IT1	12	2127379	2129698	1	0.0126199
CACNA1C-IT2	12	2157518	2158629	1	0.0126199
CACNA1C-AS4	12	2329703	2332645	1	0.0126199
CACNA1C-IT3	12	2378942	2398103	1	0.0126199
CACNA1C-AS3	12	2712516	2716606	1	0.102342
CACNA1C-AS2	12	2777666	2781386	1	0.102342
CBX3P4	12	2896097	2903461	1	0.102342
FKBP4	12	2904119	2914576	1	0.102342
ITFG2	12	2921788	2968957	1	0.102342
NRIP2	12	2934514	2944710	1	0.102342
FOXM1	12	2966847	2986206	1	0.102342
RHNO1	12	2985424	2998626	1	0.102342
TULP3	12	2986389	3050306	1	0.102342
RNU7-166P	12	3038131	3038191	1	0.102342
RNU6-1315P	12	3063406	3063504	1	0.102342
TEAD4	12	3068496	3149839	1	0.102342
TSPAN9	12	3186521	3395730	1	0.102342
TSPAN9-IT1	12	3258963	3260642	1	0.102342
EFCAB4B	12	3715799	3873985	1	0.0126199
RNU6-174P	12	3835388	3835493	1	0.0126199
PARP11	12	3900213	3982608	1	0.0126199
HSPA8P5	12	4206617	4208685	1	0.0126199
CCND2-AS1	12	4357931	4385350	1	0.0126199
CCND2-AS2	12	4361901	4384231	1	0.0126199
CCND2	12	4382938	4414516	1	0.0126199
C12orf5	12	4430371	4462338	1	0.0126199
FGF23	12	4477393	4488894	1	0.0126199
FGF6	12	4537321	4554780	1	0.0126199
C12orf4	12	4596894	4647674	1	0.0126199
RAD51AP1	12	4647950	4669214	1	0.0126199
AKAP3	12	4724674	4758213	1	0.0519721
NDUFA9	12	4758261	4798454	1	0.0519721
KCNA1	12	5019071	5040527	1	0.0519721
KCNA5	12	5153085	5155949	1	0.0519721
NTF3	12	5541278	5630702	1	0.0519721
RN7SL69P	12	6204867	6205136	1	0.0126199
CD9	12	6308881	6347425	1	0.0126199
PLEKHG6	12	6419602	6437672	1	0.0126199
TNFRSF1A	12	6437923	6451280	1	0.0126199
RN7SL391P	12	6453720	6453999	1	0.0126199
SCNN1A	12	6456009	6486896	1	0.0126199
LTBR	12	6484211	6500733	1	0.0126199
CD27-AS1	12	6548167	6560733	1	0.0126199
CD27	12	6554033	6560884	1	0.0126199
TAPBPL	12	6560856	6575683	1	0.0126199
VAMP1	12	6571403	6580153	1	0.0126199
MRPL51	12	6601150	6603007	1	0.0126199
NCAPD2	12	6602522	6641121	1	0.0126199
SCARNA10	12	6619388	6619717	1	0.0126199
GAPDH	12	6643093	6647537	1	0.0126199
IFFO1	12	6647541	6665239	1	0.0126199
NOP2	12	6666029	6677857	1	0.0126199
CHD4	12	6679249	6716642	1	0.0126199
SCARNA11	12	6690640	6690775	1	0.0126199
LPAR5	12	6728001	6745613	1	0.0126199
ACRBP	12	6747241	6756626	1	0.0126199
ING4	12	6759446	6772314	1	0.0126199
ZNF384	12	6775643	6798738	1	0.0126199
PIANP	12	6802958	6809966	1	0.0126199
RNU6-781P	12	6818618	6818718	1	0.0126199
COPS7A	12	6832907	6841041	1	0.0126199
MLF2	12	6857170	6876641	1	0.0126199
PTMS	12	6874682	6880116	1	0.0126199
LAG3	12	6881678	6887621	1	0.0126199
RN7SL380P	12	6893020	6893327	1	0.0126199
CD4	12	6896024	6929974	1	0.0126199
GPR162	12	6930711	6939136	1	0.0126199
LEPREL2	12	6937572	6949018	1	0.0126199
GNB3	12	6949118	6956557	1	0.0126199
CDCA3	12	6953957	6961230	1	0.0126199
USP5	12	6961292	6975796	1	0.0126199
TPI1	12	6976283	6980112	1	0.0126199
SPSB2	12	6980099	6998522	1	0.0126199
RPL13P5	12	6982553	6993905	1	0.0126199
LRRC23	12	6982733	7023407	1	0.0126199
DSTNP2	12	6993846	6994950	1	0.0126199
ENO2	12	7022909	7032861	1	0.0126199
ATN1	12	7033626	7051484	1	0.0126199
C12orf57	12	7052141	7055166	1	0.0126199
RNU7-1	12	7052979	7053041	1	0.0126199
PTPN6	12	7055631	7070479	1	0.0126199
EMG1	12	7072408	7105520	1	0.0126199
MIR200C	12	7072862	7072929	1	0.0126199
MIR141	12	7073260	7073354	1	0.0126199
PHB2	12	7074490	7079988	1	0.0126199
SCARNA12	12	7076500	7076769	1	0.0126199
LPCAT3	12	7085348	7125814	1	0.0126199
C1S	12	7096351	7178336	1	0.0126199
C1RL-AS1	12	7260648	7275097	1	0.0126199
RNU6-485P	12	7271381	7271487	1	0.0126199
RBP5	12	7276280	7281538	1	0.0126199
CLSTN3	12	7282294	7311541	1	0.0126199
ACSM4	12	7456880	7481320	1	0.102342
CD163L1	12	7499281	7632493	1	0.102342
CD163	12	7623409	7656489	1	0.102342
GAPDHP31	12	7718965	7719978	1	0.102342
NIFKP3	12	7756946	7757810	1	0.0519721
FOXJ2	12	8185299	8208099	1	0.102342
C3AR1	12	8210898	8219067	1	0.102342
NECAP1	12	8234807	8250367	1	0.102342
M6PR	12	9092959	9102551	1	0.102342
HNRNPA1P34	12	9180128	9181685	1	0.102342
LINC00612	12	9208182	9217666	1	0.102342
A2M-AS1	12	9217773	9220651	1	0.102342
A2M	12	9220260	9268825	1	0.102342
PZP	12	9301436	9360966	1	0.0519721
TPT1P12	12	9308477	9308968	1	0.0519721
RNU7-189P	12	9362159	9362217	1	0.0519721
PTMAP4	12	9392582	9392927	1	0.0519721
LINC00987	12	9392599	9395635	1	0.0519721
DDX12P	12	9570309	9600825	1	0.102342
KLRB1	12	9747147	9760482	1	0.102342
RNU6-700P	12	9776718	9776824	1	0.102342
GOT2P3	12	9794398	9795603	1	0.102342
CLEC2D	12	9817565	9848413	1	0.102342
CLECL1	12	9868456	9885895	1	0.102342
CD69	12	9905082	9913497	1	0.102342
KLRF1	12	9980077	9997606	1	0.102342
CLEC2B	12	10005583	10022735	1	0.102342
KLRF2	12	10034088	10048432	1	0.102342
CLEC2A	12	10051272	10084980	1	0.102342
CLEC12A	12	10103915	10148293	1	0.102342
CLEC1B	12	10138241	10166023	1	0.102342
CLEC12B	12	10163226	10171218	1	0.102342
CLEC9A	12	10183276	10218565	1	0.102342
CLEC1A	12	10222153	10264226	1	0.102342
RN7SKP161	12	10236785	10237089	1	0.102342
HNRNPABP1	12	10264337	10265070	1	0.102342
CLEC7A	12	10269376	10282857	1	0.102342
OLR1	12	10310902	10324737	1	0.102342
TMEM52B	12	10323141	10344400	1	0.102342
GABARAPL1	12	10365057	10375727	1	0.102342
TAS2R7	12	10954131	10955226	1	0.102342
TAS2R8	12	10958650	10959892	1	0.102342
TAS2R9	12	10961693	10962767	1	0.102342
TAS2R10	12	10977916	10978957	1	0.102342
PRH1	12	11033610	11036854	1	0.0519721
TAS2R13	12	11060525	11062161	1	0.0519721
PRH2	12	11081835	11084940	1	0.0519721
TAS2R15	12	11117024	11117951	1	0.0519721
TAS2R50	12	11138512	11139511	1	0.0519721
TAS2R20	12	11149094	11150474	1	0.0519721
RNU6-251P	12	15824641	15824744	1	0.102342
STRAP	12	16035325	16056412	1	0.102342
DERA	12	16064106	16190220	1	0.102342
SLC15A5	12	16341419	16430619	1	0.102342
EEF1A1P16	12	17143604	17145017	1	0.102342
RNU6-837P	12	17224332	17224439	1	0.102342
RPL7P6	12	19241974	19242825	1	0.102342
RN7SL459P	12	19329225	19329523	1	0.102342
RN7SL67P	12	19456414	19456710	1	0.102342
RNU6-254P	12	19598883	19598989	1	0.102342
EEF1A1P4	12	19609178	19610582	1	0.102342
SLCO1C1	12	20848289	20906320	1	0.102342
SLCO1B1	12	21284136	21392180	1	0.102342
IAPP	12	21507893	21532912	1	0.0519721
PYROXD1	12	21590549	21623300	1	0.0519721
TCEB1P31	12	21600479	21601248	1	0.0519721
RECQL	12	21621845	21654603	1	0.0519721
C12orf39	12	21679241	21690311	1	0.102342
MIR920	12	24365355	24365429	1	0.102342
BCAT1	12	24964295	25102393	1	0.102342
C12orf77	12	25146358	25150453	1	0.102342
LRMP	12	25173936	25261268	1	0.102342
CASC1	12	25261354	25348096	1	0.102342
LYRM5	12	25348150	25362579	1	0.102342
RNU4-67P	12	25557222	25557362	1	0.102342
TUBB4BP1	12	25593809	25593986	1	0.102342
RN7SKP262	12	25932221	25932503	1	0.102342
RASSF8-AS1	12	26092262	26112698	1	0.0519721
RASSF8	12	26111962	26232825	1	0.0519721
BHLHE41	12	26272959	26278060	1	0.0519721
RNA5SP354	12	26526531	26526666	1	0.0519721
ASUN	12	27058114	27091259	1	0.0126199
FGFR1OP2	12	27091316	27119583	1	0.0126199
TM7SF3	12	27126128	27167367	1	0.0126199
MED21	12	27175479	27219276	1	0.0126199
C12orf71	12	27233991	27235447	1	0.0126199
STK38L	12	27396901	27478892	1	0.0126199
ARNTL2	12	27485787	27576241	1	0.0126199
SMCO2	12	27619743	27655118	1	0.0126199
REP15	12	27849428	27850566	1	0.0519721
MRPS35	12	27863706	27909228	1	0.0519721
MANSC4	12	27915671	27924209	1	0.0519721
KLHL42	12	27932953	27955973	1	0.0519721
RN7SKP15	12	27959015	27959323	1	0.0519721
RNU4-54P	12	28472268	28472396	1	0.0519721
RNA5SP355	12	28658327	28658461	1	0.0519721
FAR2	12	29302036	29493913	1	0.0126199
ERGIC2	12	29490285	29534122	1	0.0126199
OVCH1-AS1	12	29542227	29640421	1	0.0126199
OVCH1	12	29565407	29650619	1	0.0126199
RNA5SP356	12	30459364	30459457	1	0.0519721
IPO8	12	30781922	30848920	1	0.0519721
CAPRIN2	12	30862486	30907885	1	0.0519721
LINC00941	12	30947977	30955645	1	0.0519721
TSPAN11	12	31079362	31149534	1	0.0519721
DDX11-AS1	12	31173697	31226781	1	0.0519721
DDX11	12	31226779	31257725	1	0.0519721
FAM60A	12	31433518	31479992	1	0.0126199
RNU6-318P	12	31519222	31519300	1	0.0126199
DENND5B	12	31535157	31744031	1	0.0126199
RNU6-618P	12	31549324	31549435	1	0.0126199
DENND5B-AS1	12	31742857	31768600	1	0.0126199
RNU5F-4P	12	31747027	31747140	1	0.0126199
RPL31P50	12	31750048	31750343	1	0.0126199
AK4P3	12	31768702	31769373	1	0.0126199
METTL20	12	31800094	31826048	1	0.0126199
H3F3C	12	31944123	31945175	1	0.0519721
RNU6-1069P	12	31955892	31956024	1	0.0519721
KIAA1551	12	32112304	32146039	1	0.0519721
RNU6-494P	12	32630316	32630405	1	0.102342
TPTE2P5	13	41396432	41495890	0	0.148035
ELF1	13	41506056	41635576	0	0.148035
WBP4	13	41635410	41658137	0	0.148035
OR7E36P	13	42005425	42006446	0	0.0272599
RGCC	13	42031695	42045018	0	0.0272599
COG3	13	46039060	46110765	0	0.00954506
AKR1B1P4	13	46261683	46262604	0	0.0272599
SPERT	13	46276446	46288694	0	0.0272599
KIAA0226L	13	46916139	47012325	0	0.148035
PPP1R2P4	13	46917102	47012325	0	0.148035
ESD	13	47345391	47371367	0	0.0272599
LINC00441	13	48870649	48877797	0	0.00954506
RCBTB1	13	50106082	50159719	0	0.0272599
CTAGE10P	13	50464727	50467134	0	0.0272599
LINC00371	13	51656984	51746524	0	0.0272599
SERPINE3	13	51909909	51938871	0	0.148035
INTS6	13	51928213	52028400	0	0.148035
LINC00379	13	91779867	91783661	1	0.055322
PPIAP23	13	91924335	91924831	1	0.055322
MIR17HG	13	92000074	92006833	1	0.055322
GPC6-AS2	13	94470677	94488397	1	0.055322
RNA5SP35	13	94677724	94677852	1	0.055322
GPC6-AS1	13	94806447	94840245	1	0.055322
DCT	13	95089558	95131936	1	0.055322
TGDS	13	95226308	95248511	1	0.055322
GPR180	13	95254157	95286899	1	0.055322
RNA5SP36	13	95303651	95303783	1	0.055322
RN7SL585P	13	95351479	95351756	1	0.055322
LINC00391	13	95351948	95355116	1	0.055322
SOX21	13	95361886	95364389	1	0.055322
SOX21-AS1	13	95364970	95368500	1	0.055322
BRD7P5	13	95409705	95411526	1	0.055322
RPL21P112	13	95412807	95413269	1	0.055322
LINC00557	13	95612295	95613573	1	0.055322
RNU6-62P	13	95671489	95671590	1	0.055322
RNY3P8	13	95963084	95963209	1	0.055322
RNY4P27	13	95988360	95988455	1	0.055322
MEMO1P5	13	96046303	96046708	1	0.055322
OXGR1	13	97637973	97646984	1	0.055322
RNA5SP37	13	98015226	98015355	1	0.055322
RAP2A	13	98086476	98121382	1	0.055322
PSMA6P4	13	98127996	98128713	1	0.055322
RPL7AP61	13	98553907	98554542	1	0.023215
IPO5	13	98605912	98676551	1	0.023215
FTLP8	13	98639204	98639470	1	0.023215
FARP1-AS1	13	99087659	99088094	1	0.055322
STK24-AS1	13	99229498	99231084	1	0.023215
NUS1P4	13	99262546	99263130	1	0.023215
CYCSP35	13	99281940	99282243	1	0.023215
CALM2P4	13	99293068	99293493	1	0.023215
RN7SL60P	13	99324234	99324529	1	0.023215
SLC15A1	13	99336055	99404908	1	0.023215
DOCK9-AS1	13	99484338	99486883	1	0.055322
RPL7L1P12	13	99601973	99602701	1	0.055322
RNU6-83P	13	99677488	99677599	1	0.055322
DOCK9-AS2	13	99740073	99740879	1	0.055322
RPS6P23	13	99825847	99826744	1	0.055322
GAPDHP22	13	99842833	99843245	1	0.055322
UBAC2-AS1	13	99848631	99852964	1	0.055322
H2AFZP3	13	99867626	99868012	1	0.023215
GPR18	13	99906968	99913998	1	0.023215
GPR183	13	99946784	99959659	1	0.023215
MIR623	13	100008385	100008482	1	0.023215
HMGB3P4	13	100024427	100024940	1	0.023215
CCR12P	13	100060035	100061316	1	0.023215
LINC00449	13	100151981	100153306	1	0.023215
TM9SF2	13	100153671	100216260	1	0.023215
RNY3P6	13	100188573	100188650	1	0.023215
LINC01039	13	100229366	100232622	1	0.023215
CFL1P8	13	100234960	100235434	1	0.023215
CLYBL	13	100258919	100549387	1	0.023215
MIR4306	13	100295313	100295403	1	0.023215
CLYBL-AS2	13	100342335	100343225	1	0.023215
CLYBL-AS1	13	100378501	100379745	1	0.023215
ZIC5	13	100615218	100624163	1	0.023215
ZIC2	13	100634026	100639018	1	0.023215
LINC00554	13	100647153	100650163	1	0.023215
NDUFA12P1	13	100680023	100680428	1	0.023215
ASNSP3	13	100714550	100715855	1	0.023215
PCCA	13	100741269	101182686	1	0.023215
RPL15P18	13	100802735	100803346	1	0.023215
PCCA-AS1	13	101116694	101133411	1	0.023215
GGACT	13	101183810	101241782	1	0.023215
RPS26P47	13	101192089	101192528	1	0.023215
TMTC4	13	101256181	101327347	1	0.023215
COX5BP6	13	101276129	101276683	1	0.023215
ARF4P3	13	101408805	101409313	1	0.055322
LINC00411	13	101593116	101596618	1	0.055322
NALCN	13	101706130	102068843	1	0.055322
FGF14	13	102372134	103054124	1	0.023215
RNU1-24P	13	102431234	102431398	1	0.023215
HMGB3P7	13	102454228	102454838	1	0.023215
MIR2681	13	102619992	102620096	1	0.023215
LIPT1P1	13	102654475	102655660	1	0.023215
RNY1P2	13	102669303	102669419	1	0.023215
MIR4705	13	102698284	102698354	1	0.023215
RPL39P29	13	102915396	102915552	1	0.023215
FGF14-IT1	13	102944677	103046869	1	0.023215
FGF14-AS1	13	103019889	103026016	1	0.023215
FGF14-AS2	13	103046980	103048053	1	0.023215
LINC00555	13	103241722	103242163	1	0.023215
METTL21C	13	103338094	103346854	1	0.055322
CCDC168	13	103381801	103389159	1	0.055322
LINC00283	13	103395340	103397574	1	0.055322
TEX30	13	103418340	103426161	1	0.055322
KDELC1	13	103436631	103451357	1	0.055322
BIVM	13	103451399	103493885	1	0.055322
BIVM-ERCC5	13	103459704	103524748	1	0.055322
RNY5P8	13	103472343	103472419	1	0.055322
ERCC5	13	103497194	103528345	1	0.055322
METTL21EP	13	103532449	103548383	1	0.055322
SLC10A2	13	103696350	103719196	1	0.055322
RPL7P45	13	105466678	105467420	1	0.055322
DAOA-AS1	13	106111404	106158030	1	0.055322
DAOA	13	106118216	106143383	1	0.055322
LINC00343	13	106356629	106416789	1	0.055322
RNA5SP38	13	106807721	106807839	1	0.055322
ARGLU1	13	107194021	107220512	1	0.055322
LINC00551	13	107270158	107283707	1	0.055322
LINC00443	13	107306264	107324511	1	0.055322
ATP5G1P5	13	107315785	107316195	1	0.055322
LINC00354	13	112554299	112555490	1	0.055322
SOX1	13	112721913	112726020	1	0.055322
LINC00404	13	112760409	112761196	1	0.055322
LINC00403	13	112761433	112762329	1	0.055322
LINC01070	13	112851664	112855314	1	0.055322
LINC01043	13	112967781	112976072	1	0.055322
LINC01044	13	112976881	112985539	1	0.055322
SPACA7	13	113030633	113089003	1	0.055322
RNU6-297P	14	48810429	48810535	1	0.146549
SOS2	14	50583847	50698276	1	0.146549
MAP4K5	14	50885219	51027844	1	0.146549
ATL1	14	50999227	51099786	1	0.146549
NIN	14	51186481	51297839	1	0.146549
PYGL	14	51324609	51411454	1	0.146549
ABHD12B	14	51338878	51371688	1	0.146549
TRIM9	14	51441980	51562779	1	0.146549
ACTN1	14	69340860	69446157	0	0.0230056
GALNT16	14	69725994	69821183	0	0.00326164
SLC8A3	14	70510934	70655787	0	0.00326164
RGS6	14	72399156	73030654	0	0.0230056
PSEN1	14	73603126	73690399	0	0.0777523
NUMB	14	73741815	73930348	0	0.0777523
LTBP2	14	74964873	75079306	0	0.0230056
NEK9	14	75548822	75594047	0	0.0777523
IFT43	14	76368479	76550928	0	0.0777523
STON2	14	81727000	81902809	0	0.0777523
LINC00911	14	85860223	85886418	0	0.0777523
FLRT2	14	85996488	86095034	0	0.0777523
GALC	14	88304164	88460009	0	0.0777523
FAM35CP	14	88418871	88421547	0	0.0777523
RNU6-835P	14	88462689	88462792	0	0.0777523
GPR65	14	88471468	88478419	0	0.0777523
LINC01146	14	88490894	88563276	0	0.0777523
KCNK10	14	88649113	88793251	0	0.0777523
SPATA7	14	88851268	88936694	0	0.0777523
PTPN21	14	88932122	89021077	0	0.0777523
RNU4-22P	14	88979842	88980007	0	0.0777523
ZC3H14	14	89029253	89079853	0	0.0777523
EML5	14	89078775	89259096	0	0.0777523
RNU4-92P	14	89286641	89286776	0	0.0777523
TTC8	14	89290497	89344335	0	0.0777523
MPPE1P1	14	89576492	89577567	0	0.0777523
FOXN3	14	89591215	90085493	0	0.0777523
CAP2P1	14	89756549	89757938	0	0.0777523
FOXN3-AS1	14	89883698	89886137	0	0.0777523
FOXN3-AS2	14	90042560	90043821	0	0.0777523
RN7SKP107	14	90088262	90088551	0	0.0777523
RN7SKP255	14	90178855	90179167	0	0.0777523
CHORDC2P	14	90203309	90204735	0	0.0777523
EFCAB11	14	90261013	90421121	0	0.0777523
RAB42P1	14	90358132	90358788	0	0.0777523
TDP1	14	90421283	90511106	0	0.0777523
KCNK13	14	90528109	90652201	0	0.0777523
PSMC1	14	90722839	90738968	0	0.0777523
NRDE2	14	90742580	90798481	0	0.0777523
RPS6KA5	14	91336799	91526980	0	0.0777523
C14orf159	14	91526677	91691976	0	0.0777523
RNU7-30P	14	91557421	91557482	0	0.0777523
SNORA11B	14	91592769	91592897	0	0.0777523
RN7SL506P	14	91614372	91614663	0	0.0777523
GPR68	14	91698876	91720269	0	0.0777523
CCDC88C	14	91737667	91884188	0	0.0777523
OTUD7A	15	31775329	32162992	0	0.0248585
FMN1	15	33057747	33486897	0	0.00568364
RYR3	15	33603163	34158303	0	0.00568364
AVEN	15	34158428	34331377	0	0.00568364
CHRM5	15	34260921	34357291	0	0.00568364
KATNBL1	15	34432875	34502297	0	0.00568364
SLC12A6	15	34525460	34630261	0	0.00568364
AQR	15	35147732	35262040	0	0.00568364
MIR3942	15	35664457	35664565	0	0.00568364
C15orf41	15	36871812	37102449	0	0.00568364
MEIS2	15	37181406	37393504	0	0.00568364
TMCO5A	15	38214140	38259925	0	0.0248585
SPRED1	15	38544527	38649450	0	0.0248585
BUB1B	15	40453224	40513337	0	0.00568364
PHGR1	15	40643234	40648635	0	0.00568364
C15orf57	15	40820882	40857256	0	0.00568364
CASC5	15	40886218	40956540	0	0.00568364
OIP5	15	41601466	41624819	0	0.11982
RTF1	15	41700606	41775761	0	0.11982
MGA	15	41913422	42062141	0	0.11982
RN7SL347P	15	44726452	44726705	0	0.0248585
EIF3J-AS1	15	44819455	44829121	0	0.11982
EIF3J	15	44829255	44855227	0	0.11982
PATL2	15	44957930	45003514	0	0.11982
B2M	15	45003675	45011075	0	0.11982
TRIM69	15	45021186	45060027	0	0.11982
DPPA5P2	15	45858974	45859272	0	0.11982
BLOC1S6	15	45879321	45908197	0	0.11982
SQRDL	15	45923346	45983492	0	0.11982
RN7SKP101	15	47012391	47012710	0	0.0248585
DNM1P42	15	83200404	83202890	1	0.0897174
RPS17L	15	83205504	83209315	1	0.0897174
CPEB1	15	83211951	83317612	1	0.0897174
AP3B2	15	83328033	83378666	1	0.0897174
SEC11A	15	85212775	85259947	1	0.0897174
ALPK3	15	85359911	85416713	1	0.0897174
SLC28A1	15	85427885	85518876	1	0.0897174
RNU6-339P	15	85481647	85481753	1	0.0897174
RNU6-796P	15	85482848	85482954	1	0.0897174
NIFKP8	15	85724441	85725314	1	0.0897174
CSPG4P12	15	85734669	85757136	1	0.0897174
RN7SL428P	15	85753262	85753544	1	0.0897174
RNU6-1280P	15	86194753	86194859	1	0.0203365
MIR1276	15	86313727	86313809	1	0.0203365
RNU6-231P	15	86365086	86365188	1	0.0897174
MIR548AP	15	86368866	86368961	1	0.0897174
ACAN	15	89346674	89418585	1	0.0897174
C15orf32	15	93014884	93044347	1	0.0203365
HMGN1P38	15	93254977	93256105	1	0.00262395
ASB9P1	15	93338877	93339669	1	0.00262395
RN7SL599P	15	93399733	93400024	1	0.00262395
MIR3175	15	93447629	93447705	1	0.00262395
RGMA	15	93586636	93632433	1	0.00262395
SPATA8-AS1	15	97315235	97326542	1	0.000811859
LINC00923	15	98285448	98417780	1	0.00262395
ARRDC4	15	98462784	98517068	1	0.00262395
FAM169B	15	98980391	99057611	1	0.000811859
PGPEP1L	15	99511459	99551024	1	0.00262395
RNA5SP402	15	100614286	100614395	1	0.00262395
ITFG1	16	47188298	47498060	0	6.25e-05
PHKB	16	47495034	47735434	0	6.25e-05
SPECC1	17	19912657	20222339	0	0
RNU6-258P	17	20029701	20029801	0	0
OLA1P2	17	20678955	20680218	0	0
ABHD17AP6	17	20717933	20747570	0	0
CCDC144NL	17	20739760	20799453	0	0
RNASEH1P1	17	20805252	20805993	0	0.00176739
DHRS7B	17	21026677	21096578	0	0.00176739
ZPBP2	17	38024417	38034149	1	0.00932762
GSDMA	17	38119226	38134019	1	0.00932762
PHB	17	47481414	47492246	1	4.56e-05
FAM117A	17	47787694	47866542	1	0.00104483
KAT7	17	47865917	47906458	1	0.00104483
TAC4	17	47915671	47925379	1	0.00104483
PDK2	17	48172101	48189516	1	0.000348804
PPP1R9B	17	48211104	48227991	1	0.000348804
SUMO2P7	17	48313206	48313490	1	4.56e-05
TMEM92	17	48348767	48358844	1	4.56e-05
MRPL27	17	48445218	48450575	1	0
EME1	17	48450581	48458844	1	0
LRRC59	17	48452420	48474914	1	0
ACSF2	17	48503519	48552206	1	0
CACNA1G	17	48638429	48704835	1	0
ABCC3	17	48712138	48769613	1	0
ANKRD40	17	48770551	48785285	1	0
LUC7L3	17	48796905	48833574	1	0
LINC00483	17	48838390	48844918	1	0
WFIKKN2	17	48912011	48919709	1	0
RPL5P33	17	48925311	48926631	1	0
TOB1	17	48939584	48945339	1	0
TOB1-AS1	17	48944040	48987098	1	0
SPAG9	17	49039535	49198226	1	0
NME1	17	49230897	49239789	1	0
NME1-NME2	17	49230920	49249108	1	0
NME2	17	49230951	49249105	1	0
UTP18	17	49337889	49375297	1	0.00104483
RPL7P48	17	49579849	49580594	1	0.000348804
RN7SL699P	17	49672867	49673118	1	0.000348804
C17orf112	17	51062880	51065012	1	0.0318095
RPS2P48	17	51834350	51835231	1	0.0318095
KIF2B	17	51900239	51902573	1	0.0318095
ARL2BPP8	17	52831526	52832010	1	0.00932762
RN7SKP14	17	52848310	52848638	1	0.00932762
COX11	17	53029263	53046146	1	0.0318095
RNU6-1158P	17	54948531	54948637	1	0
TRIM25	17	54965270	54991399	1	0
MIR3614	17	54968631	54968716	1	0
COIL	17	55015548	55038415	1	0
SCPEP1	17	55055466	55084129	1	0
MSI2	17	55333212	55762046	1	0
RN7SKP94	17	55866810	55867093	1	4.56e-05
VEZF1	17	56048910	56065620	1	0.000348804
38231	17	56597611	56618179	1	0
GDPD1	17	57297828	57353328	1	0
SNRPGP17	17	57358491	57358704	1	0
YPEL2	17	57409050	57479090	1	0
DHX40	17	57642886	57685706	1	0
CLTC	17	57697219	57773671	1	0
PTRH2	17	57751997	57784987	1	0
VMP1	17	57784553	57919616	1	0
USP32	17	58256455	58499831	1	0
C17orf64	17	58469790	58508782	1	0
APPBP2	17	58520520	58603580	1	0
PPM1D	17	58677544	58741849	1	0
BCAS3	17	58754814	59470199	1	0
INTS2	17	59942731	60005377	1	0
POLG2	17	62473902	62493154	1	0
PLEKHM1P	17	62775377	62833272	1	0.00104483
RN7SL409P	17	62813308	62813597	1	0.00104483
RNU7-115P	17	62821883	62821937	1	0.00104483
GNA13	17	63006833	63052957	1	0.00104483
RGS9	17	63133549	63223821	1	4.56e-05
ABCA8	17	66863433	66951533	1	0.00369456
ABCA9-AS1	17	67000855	67014464	1	0.00369456
CPSF4L	17	71244588	71258491	1	0.000348804
CDC42EP4	17	71279763	71308314	1	0.000348804
ARMC7	17	73106047	73126360	1	0.135213
GRB2	17	73314157	73401790	1	0.0318095
ACOX1	17	73937588	73975515	1	0.0318095
RNF157	17	74138534	74236454	1	0.0318095
UBE2O	17	74385532	74449288	1	0.0318095
RHBDF2	17	74466973	74497872	1	0.0318095
JMJD6	17	74708919	74722866	1	0.0318095
METTL23	17	74722912	74730018	1	0.0318095
SRSF2	17	74730197	74733456	1	0.0318095
MIR636	17	74732532	74732630	1	0.0318095
RNU6-97P	17	74748994	74749097	1	0.0318095
LINC00868	17	74846258	74857918	1	0.00932762
40057	17	75276651	75496678	1	0.00104483
ENDOV	17	78388965	78411886	1	0.135213
SLC25A1P5	19	28296331	28297113	1	0.0577451
LINC00906	19	29456038	29461781	1	0.0577451
RNA5SP470	19	29492577	29492682	1	0.0577451
PLEKHF1	19	30155963	30166364	1	0.0577451
C19orf12	19	30191721	30206364	1	0.0577451
CCNE1	19	30302805	30315215	1	0.0577451
TGM3	20	2276647	2321724	0	0.109508
TGM6	20	2361554	2413399	0	0.109508
SNRPB	20	2442280	2451499	0	0.109508
SNORD119	20	2443608	2443683	0	0.109508
ZNF343	20	2462463	2505348	0	0.109508
NOP56	20	2632791	2639039	0	0.109508
MIR1292	20	2633423	2633488	0	0.109508
SNORD110	20	2634858	2634932	0	0.109508
SNORA51	20	2635713	2635844	0	0.109508
SNORD86	20	2636743	2636828	0	0.109508
SNORD56	20	2637270	2637340	0	0.109508
SNORD57	20	2637585	2637656	0	0.109508
IDH3B	20	2639041	2644865	0	0.109508
SF3A3P1	20	3470176	3471652	0	0.109508
GFRA4	20	3639939	3644046	0	0.109508
ADAM33	20	3648612	3662893	0	0.109508
SIGLEC1	20	3667617	3687775	0	0.109508
HSPA12B	20	3713314	3733758	0	0.109508
C20orf27	20	3734155	3749034	0	0.109508
SPEF1	20	3758151	3762095	0	0.109508
CENPB	20	3764498	3767337	0	0.109508
CDC25B	20	3767578	3786762	0	0.109508
STAU1	20	47729878	47804904	1	0.0619684
SNORD12C	20	47895477	47895565	1	0.0108846
SNORD12B	20	47896856	47896946	1	0.0108846
SNORD12	20	47897220	47897309	1	0.0108846
PTGIS	20	48120411	48184683	1	0.00252389
B4GALT5	20	48249482	48330415	1	0.00252389
RN7SL197P	20	48338486	48338782	1	0.00252389
SNRPFP1	20	48346128	48346379	1	0.00252389
RNU6-919P	20	48411348	48411451	1	0.00252389
SLC9A8	20	48429250	48508779	1	0.00252389
RNF114	20	48552948	48570429	1	0.0108846
KRT18P4	20	48573282	48574569	1	0.0108846
RNU6-147P	20	48588643	48588749	1	0.0108846
SNAI1	20	48599536	48605423	1	0.0108846
TMEM189-UBE2V1	20	48697661	48770174	1	0.00252389
TMEM189	20	48697663	48770335	1	0.00252389
FAM65C	20	49202645	49308065	1	0.000566021
BCAS4	20	49411431	49493714	1	6.14e-05
ADNP	20	49505585	49547958	1	0.000566021
KCNG1	20	49620193	49639666	1	0.000566021
ATP9A	20	50213053	50385173	1	0.00252389
TSHZ2	20	51588946	52111869	1	6.14e-05
ZNF217	20	52183604	52226446	1	0
CYP24A1	20	52769988	52790512	1	6.14e-05
PFDN4	20	52824386	52844591	1	6.14e-05
RPL12P4	20	53691155	53691685	1	0.00252389
CASS4	20	54987168	55034396	1	0.00252389
RPL39P	20	55034484	55034639	1	0.00252389
SLCO4A1	20	61273797	61317137	1	0.00252389
NTSR1	20	61340189	61394123	1	0.00252389
NF1P3	21	15373248	15377600	0	0.00559781
ANKRD20A18P	21	15436646	15441408	0	0.00559781
RNA5SP488	21	15443192	15443307	0	0.00559781
LIPI	21	15481134	15583166	0	0.00559781
ERLEC1P1	21	15515902	15516479	0	0.00559781
RBM11	21	15588451	15600693	0	0.00559781
HSPA13	21	15743436	15755805	0	0.0194419
RNU6-426P	21	17407733	17407829	0	0.0194419
VDAC2P1	21	17466735	17467692	0	0.0194419
RPS26P5	21	17493630	17493964	0	0.0194419
MIR99A	21	17911409	17911489	0	0.0194419
MIRLET7C	21	17912143	17912236	0	0.0194419
RNU1-98P	21	18091317	18091476	0	0.00559781
NEK4P1	21	18582787	18583665	0	0.00559781
RNU6-113P	21	18803865	18803965	0	0.00559781
C21orf37	21	18811208	18821503	0	0.00559781
RNU7-168P	21	18824999	18825052	0	0.00559781
RPL39P40	21	18872997	18873142	0	0.00559781
RN7SL163P	21	18878771	18879044	0	0.00559781
CXADR	21	18884700	18965897	0	0.00559781
BTF3L4P1	21	18890841	18891311	0	0.00559781
BTG3	21	18965971	18985265	0	0.00559781
C21orf91-OT1	21	19135632	19164840	0	0.0194419
C21orf91	21	19161284	19191703	0	0.0194419
CHODL-AS1	21	19207333	19257925	0	0.0194419
RPL37P3	21	19266510	19266802	0	0.0194419
IL17RA	22	17565844	17596583	0	0.100884
CECR6	22	17597189	17602257	0	0.100884
CECR5	22	17618401	17646177	0	0.100884
CECR5-AS1	22	17640274	17646335	0	0.100884
CECR1	22	17660194	17702879	0	0.100884
FAM32B	22	17694618	17695045	0	0.100884
CLCP1	22	17903436	17903823	0	0.100884
DNAJA1P6	22	17997708	17998061	0	0.0340348
SLC25A18	22	18043139	18073760	0	0.0340348
ATP6V1E1	22	18074902	18111584	0	0.0340348
BCL2L13	22	18111621	18213388	0	0.0340348
BID	22	18216906	18257536	0	0.0340348
MIR3198-1	22	18246946	18247025	0	0.0340348
LINC00528	22	18260088	18262247	0	0.0340348
MICAL3	22	18270415	18507325	0	0.100884
MIR648	22	18463634	18463727	0	0.100884
RHEBP3	22	18501980	18502966	0	0.100884
GUCD1	22	24936406	24951903	0	0.100884
SNRPD3	22	24951471	25005947	0	0.100884
GGT1	22	24979718	25024972	0	0.100884
FAM211B	22	24981588	24989175	0	0.100884
BCRP3	22	25028882	25046799	0	0.100884
POM121L10P	22	25041133	25055114	0	0.100884
ARL5AP4	22	25082135	25082646	0	0.100884
CRIP1P4	22	25108259	25108489	0	0.100884
PIWIL3	22	25115001	25170687	0	0.100884
SGSM1	22	25202236	25323545	0	0.100884
TMEM211	22	25331077	25342662	0	0.100884
KIAA1671	22	25348697	25593415	0	0.100884
CRYBB3	22	25595817	25603330	0	0.100884
CRYBB2	22	25615489	25627836	0	0.100884
IGLL3P	22	25714223	25716047	0	0.100884
LRP5L	22	25747385	25801344	0	0.100884
IGLVIVOR22-1	22	25833273	25833790	0	0.100884
CRYBB2P1	22	25844072	25916821	0	0.100884
ADRBK2	22	25960816	26125261	0	0.100884
RNA5SP494	22	26111008	26111136	0	0.100884
MYO18B	22	26138111	26427007	0	0.100884
RN7SKP169	22	26359949	26360239	0	0.100884
SEZ6L	22	26565440	26779562	0	0.100884
RNA5SP495	22	26786633	26786742	0	0.100884
ASPHD2	22	26825239	26840981	0	0.100884
HPS4	22	26839389	26879803	0	0.100884
SRRD	22	26879843	26890624	0	0.100884
TFIP11	22	26887191	26908471	0	0.100884
TPST2	22	26921458	26992681	0	0.100884
MIR548J	22	26951178	26951289	0	0.100884
HMGB1P10	22	26956492	26957054	0	0.100884
CRYBB1	22	26995242	27014052	0	0.100884
CRYBA4	22	27017928	27026636	0	0.100884
ISCA2P1	22	27040853	27041300	0	0.100884
MIAT	22	27042392	27072438	0	0.100884
TTC28-AS1	22	28315364	28404569	0	0.100884
MIR3199-1	22	28316513	28316600	0	0.100884
MIR3199-2	22	28316513	28316600	0	0.100884
TTC28	22	28374004	29075853	0	0.100884
RN7SL757P	22	28452143	28452441	0	0.100884
RN7SL162P	22	29038969	29039258	0	0.100884
CNN2P1	22	30442265	30443182	0	0.100884
HORMAD2	22	30476163	30573064	0	0.100884
LIF	22	30636436	30642840	0	0.100884
OSM	22	30658818	30662829	0	0.100884
GATSL3	22	30681106	30685616	0	0.100884
TBC1D10A	22	30687979	30723035	0	0.100884
SF3A1	22	30727977	30752936	0	0.100884
CCDC157	22	30752624	30774647	0	0.100884
RNF215	22	30773835	30817760	0	0.100884
SEC14L2	22	30792846	30821305	0	0.100884
RNU6-564P	22	30817034	30817137	0	0.100884
MTFP1	22	30821518	30825045	0	0.100884
SEC14L3	22	30843946	30868036	0	0.100884
SDC4P	22	30877298	30877898	0	0.100884
SEC14L4	22	30884900	30901698	0	0.100884
SEC14L6	22	30918786	30942669	0	0.100884
SIRPAP1	22	30938523	30940292	0	0.100884
GAL3ST1	22	30950622	30970574	0	0.100884
PES1	22	30972612	31003070	0	0.100884
TCN2	22	31002825	31023265	0	0.100884
SLC35E4	22	31031639	31065003	0	0.100884
DUSP18	22	31048038	31063877	0	0.100884
MIR3200	22	31127544	31127628	0	0.100884
PRR14L	22	32072242	32146126	0	0.100884
DEPDC5	22	32149944	32303012	0	0.100884
RN7SL20P	22	32153188	32153482	0	0.100884
RNU6-201P	22	32233224	32233284	0	0.100884
C22orf24	22	32329507	32341504	0	0.100884
YWHAH	22	32340447	32353590	0	0.100884
RN7SL305P	22	32377132	32377414	0	0.100884
SLC5A1	22	32439019	32509016	0	0.100884
AP1B1P1	22	32517964	32529456	0	0.100884
AP1B1P2	22	32530015	32530120	0	0.100884
C22orf42	22	32544993	32555309	0	0.100884
RFPL2	22	32586422	32600718	0	0.100884
IGLCOR22-1	22	32595906	32596221	0	0.100884
SLC5A4	22	32614465	32651328	0	0.100884
CPSF1P1	22	32665368	32669097	0	0.100884
RFPL3	22	32750872	32757148	0	0.100884
IGLCOR22-2	22	32752663	32752975	0	0.100884
RFPL3S	22	32755893	32778039	0	0.100884
IGLVIVOR22-2	22	32772669	32773122	0	0.100884
RTCB	22	32783569	32808242	0	0.100884
BPIFC	22	32809834	32860471	0	0.100884
FBXO7	22	32870663	32894818	0	0.100884
SYN3	22	32908539	33454358	0	0.100884
RNA5SP497	22	33031088	33031184	0	0.100884
TIMP3	22	33197687	33259030	0	0.100884
LARGE	22	33558212	34318829	0	0.100884
MIR4764	22	33832568	33832655	0	0.100884
LARGE-IT1	22	34119818	34120898	0	0.100884
LARGE-AS1	22	34121000	34146830	0	0.100884
