# Supplementary material for: Molecular characterization of early breast cancer onset to understand disease phenotypes in African patients
Source: Med Oncol. 2022 Nov 9;40(1):13. doi: 10.1007/s12032-022-01877-8 (PMC9646617; doi:10.1007/s12032-022-01877-8)
Supplement: Supplementary file 3 — Supplementary file3 (XLSX 137 kb) [file 12032_2022_1877_MOESM3_ESM.xlsx]

## Sheet: Tabelle1
Symbol	logFC	logCPM	F	PValue	FDR
ABCA10	-1.66102	6.46422	2754.52	3.59803e-171	5.35854e-168
ABCA13	-1.05253	5.63817	188.299	8.66695e-35	4.19626e-34
ABCA4	-1.11301	6.2984	1271.66	9.6221e-100	2.96078e-98
ABCC12	-1.79598	6.14284	584.997	1.47929e-77	2.16842e-76
ABCC13	-1.01473	5.48822	91.9591	1.48896e-19	4.66156e-19
ABCC2	-1.34958	6.27886	1483.86	5.02922e-130	6.40173e-128
ABHD1	-1.04944	6.16155	1451.32	1.95232e-80	3.16078e-79
ABHD12B	-1.46276	5.90659	459.893	2.08894e-66	2.21271e-65
ABHD14A	1.21914	5.83208	485.244	8.41154e-69	9.46887e-68
ABL1	1.27652	6.14868	909.281	1.02524e-100	3.27659e-99
ABP1	-1.16011	6.20714	883.702	4.06245e-99	1.22226e-97
ACADL	-1.41508	5.92064	485.23	8.43654e-69	9.48983e-68
ACAP2	1.52146	6.00421	592.292	3.68367e-78	5.5026e-77
ACBD3	1.11179	6.19533	2346.62	2.5755e-102	8.63894e-101
ACCN1	-2.20097	6.21543	1315.26	1.69033e-122	1.47217e-120
ACE2	-1.48699	6.0706	655.058	3.5925e-83	6.33173e-82
ACHE	-1.20862	6.30263	2519.61	9.35297e-116	6.03003e-114
ACP2	1.08496	6.12367	589.597	6.14856e-78	9.13877e-77
ACPP	-1.55391	6.65459	6076.12	3.81483e-228	5.68142e-224
ACSL6	-1.07504	6.05078	785.779	1.10073e-76	1.57022e-75
ACTA1	-1.73052	6.60197	2329.75	1.16127e-159	7.51945e-157
ACTC1	-2.07276	6.07498	1304.35	5.50602e-122	4.71271e-120
ACTG2	1.3193	5.80406	346.796	9.44325e-55	7.41764e-54
ACTL8	-1.39807	6.05052	384.263	8.32554e-59	7.22987e-58
ACTN2	-1.23003	6.00638	508.529	6.22677e-71	7.50286e-70
ADAM15	1.25363	6.2549	1415.09	4.84189e-127	5.34151e-125
ADAM32	-1.08367	6.0941	808.235	1.33104e-80	2.16411e-79
ADAM9	2.38136	5.90337	583.525	1.96079e-77	2.85735e-76
ADAMTS8	-1.10029	6.20475	1273.4	1.25507e-90	2.70502e-89
ADCYAP1	-1.28977	6.15431	721.37	3.86896e-88	7.87165e-87
ADH1C	-1.0306	5.95978	294.744	9.72981e-49	6.57767e-48
ADIPOR2	1.16385	6.21392	746.926	5.67526e-90	1.20918e-88
ADRA2B	-1.22991	6.28027	2325.42	3.17575e-117	2.17956e-115
ADRB1	-1.40621	6.10591	984.212	3.22585e-105	1.23821e-103
AFP	-1.97375	6.05862	657.822	2.19742e-83	3.91461e-82
AGAP1	2.20975	5.75429	399.385	2.19093e-60	1.98115e-59
AGAP3	1.15247	6.12014	2145.5	6.37368e-103	2.18214e-101
AGAP4	3.3056	5.44286	992.863	9.92601e-106	3.89021e-104
AGFG1	2.98477	5.80099	1554.98	5.23389e-133	7.642e-131
AGGF1	1.8604	5.88844	600.098	8.4214e-79	1.28241e-77
AGR2	1.08673	6.20977	220.305	2.99072e-39	1.59645e-38
AGR3	1.64583	5.76175	257.149	4.32331e-44	2.62436e-43
AGXT	-3.15845	5.84864	1385.6	9.74098e-126	1.0005e-123
AICDA	-2.8215	6.00989	1785.82	6.27791e-142	1.55828e-139
AIM1L	-1.05867	6.14235	907.056	1.95254e-80	3.16078e-79
AIP	1.96569	5.86091	791.249	4.6416e-93	1.099e-91
AKR1B10	-1.33738	5.99112	415.011	5.50681e-62	5.18413e-61
AKR1B15	-1.34002	5.81225	329.63	8.07009e-53	6.00039e-52
AKR1D1	-2.79523	6.13057	1562.63	2.61928e-133	3.9403e-131
ALDH1A2	-1.01035	6.26835	1121.48	6.47609e-82	1.0985e-80
ALDH1A3	1.02897	5.96918	575.452	2.05176e-73	2.67808e-72
ALDH3A1	-1.9549	6.19692	1534.42	3.78813e-132	5.17583e-130
ALDOA	1.45329	6.42171	883.018	4.48701e-99	1.34728e-97
ALG11	-1.0287	6.23767	2916.95	1.52418e-82	2.65493e-81
ALG6	1.26871	5.90433	631.275	2.57789e-81	4.27533e-80
ALOX15	-1.20972	6.23454	684.343	2.10191e-85	3.9475e-84
ALOXE3	-1.48338	6.25813	1543.78	1.55422e-132	2.18367e-130
ALPL	1.08323	5.87874	408.928	2.27285e-61	2.11692e-60
AMBP	-1.03188	5.99155	340.796	4.44079e-54	3.41615e-53
AMMECR1	1.06086	5.96585	655.303	1.55788e-77	2.27688e-76
AMPD2	1.50048	5.93299	551.606	9.87078e-75	1.33763e-73
ANAPC1	2.03792	5.80106	883.842	3.9123e-99	1.17947e-97
ANAPC7	1.19706	6.0909	266.377	2.94493e-45	1.84824e-44
ANK1	-1.24133	6.39283	1769.77	2.30691e-130	2.96179e-128
ANKLE1	-1.12664	6.06864	1566.49	1.45526e-84	2.68232e-83
ANKRD1	-1.80842	6.01982	979.54	6.05269e-105	2.27633e-103
ANKRD17	2.11134	5.98762	982.844	3.87788e-105	1.48466e-103
ANO10	1.05178	6.08927	1001.44	1.61927e-84	2.98094e-83
AP1G1	2.21529	5.95927	742.641	1.14405e-89	2.41679e-88
APOC2	2.18884	5.442	440.709	1.49855e-64	1.49684e-63
APOE	1.38702	6.2071	1279.72	8.15447e-121	6.63632e-119
AQP7	-1.15696	6.21175	598.639	1.10863e-78	1.68135e-77
AQP9	-1.08404	6.40191	1205.82	2.37356e-103	8.27855e-102
ARFGAP2	1.30306	6.13911	706.15	5.01492e-87	9.86621e-86
ARHGAP36	-1.36627	5.51456	188.101	9.2541e-35	4.47762e-34
ARHGAP39	1.17768	5.95827	457.676	3.3795e-66	3.55445e-65
ARMC10	1.38739	5.99134	826.484	1.98936e-95	5.21612e-94
ARMCX2	1.15828	6.03297	530.251	7.16929e-73	9.19658e-72
ARSB	1.55506	5.81425	329.511	8.37217e-53	6.21879e-52
ARSE	-1.11644	6.40542	1892.58	3.22174e-109	1.49942e-107
ART4	-1.5467	5.55081	415.955	4.38588e-62	4.13672e-61
ASAP1	1.19028	6.08672	725.763	1.85926e-88	3.81931e-87
ASB8	1.28678	5.98959	513.837	2.07288e-71	2.53252e-70
ASCL1	-1.73106	5.99773	441.76	1.19169e-64	1.19113e-63
ASNA1	1.47204	6.05341	905.227	1.82768e-100	5.77911e-99
ASTN1	-1.62147	6.32292	1454.56	9.09949e-129	1.11081e-126
ASXL1	1.39252	6.07191	1261.78	5.8146e-120	4.53386e-118
ATM	1.00499	6.1017	498.037	5.61398e-70	6.56788e-69
ATN1	1.75579	6.12889	611.88	9.28592e-80	1.46499e-78
ATOX1	1.31341	6.0416	571.173	2.12341e-76	3.00607e-75
ATP1A3	-1.07193	6.28612	1048.03	2.26542e-92	5.24036e-91
ATP1A4	-1.54994	6.34977	1149.77	2.46454e-114	1.45077e-112
ATP1B3	1.5631	6.04819	1161.49	5.9601e-115	3.65283e-113
ATP2A1	-1.56342	6.25649	2876.31	3.44478e-173	5.70035e-170
ATP2B2	-1.66194	6.26011	1680.27	5.71155e-138	1.05015e-135
ATP2C1	1.24682	6.19398	1680.02	1.3054e-126	1.38867e-124
ATP6AP2	1.24747	6.24892	1910.56	1.59558e-132	2.22084e-130
ATP6V1B2	1.00485	6.22361	1865.35	1.64018e-86	3.17648e-85
ATP6V1G1	1.99736	6.02961	711.676	1.97005e-87	3.91722e-86
ATP6V1H	1.77302	5.97562	820.501	5.04145e-95	1.29452e-93
ATP8A2	-1.29241	6.18383	1450.93	3.51145e-118	2.53864e-116
AVPI1	2.37319	5.53579	555.558	4.46762e-75	6.10986e-74
AZGP1	1.51694	6.32216	1455.47	8.30506e-129	1.02221e-126
B3GAT1	-1.44739	6.35447	1315.43	1.66054e-122	1.45473e-120
B4GALNT2	-1.61375	5.87391	506.673	9.10095e-71	1.08606e-69
BAD	1.09194	6.05701	897.654	2.64126e-88	5.40333e-87
BAG5	1.31407	6.07565	384.962	7.02563e-59	6.10816e-58
BAI1	-1.00525	6.1544	910.765	4.79617e-74	6.37193e-73
BAT2	1.10733	6.3542	676.429	8.31198e-85	1.5416e-83
BBOX1	-1.04859	6.30521	476.245	5.8789e-68	6.45206e-67
BBS1	1.14961	6.04933	757.312	1.03386e-90	2.23149e-89
BCAN	-1.26875	6.16682	1182.71	7.09042e-113	3.86804e-111
BCAR4	-2.65547	5.49989	850.42	5.37922e-97	1.49186e-95
BCL10	1.21601	5.95025	732.525	5.96613e-89	1.24097e-87
BCL2L2	1.26684	6.03884	529.589	8.20097e-73	1.05019e-71
BCL3	1.17631	6.09831	1230.82	4.9692e-105	1.88311e-103
BCL7B	1.00647	6.11604	1087.58	1.64991e-79	2.5596e-78
BEX1	-1.28529	6.28747	505.848	1.09079e-70	1.2965e-69
BHLHE22	-1.0193	6.32397	2298.2	5.26915e-87	1.03391e-85
BLK	-1.50157	6.13982	800.6	1.0892e-93	2.63764e-92
BLMH	1.4805	5.95407	799.827	1.20949e-93	2.92417e-92
BMP3	-2.23529	5.92363	1141.5	6.51297e-114	3.73068e-112
BNC1	-1.11152	5.83213	368.549	3.9242e-57	3.25589e-56
BNIP3L	2.19386	5.95922	875.406	1.36191e-98	4.0485e-97
BPI	-2.13565	6.18404	975.152	1.09516e-104	4.04722e-103
BRSK2	-1.54942	6.2315	922.825	1.50542e-101	4.92752e-100
BTLA	-1.00195	6.1083	850.072	6.71671e-71	8.0671e-70
C10orf10	1.31943	6.04844	843.189	1.58885e-96	4.34976e-95
C10orf46	1.00301	6.20395	287.295	7.71424e-48	5.12436e-47
C10orf82	-1.0606	6.09712	239.795	7.55388e-42	4.30704e-41
C11orf66	-1.09197	6.22667	2952.29	5.18667e-91	1.13763e-89
C12orf51	1.03207	6.15105	1523.71	8.64709e-86	1.64262e-84
C12orf53	-1.25455	6.11702	1606.52	2.90165e-106	1.1775e-104
C12orf60	-1.06304	6.32263	4524.27	1.0501e-93	2.5471e-92
C13orf37	1.341	5.89246	370.025	2.73909e-57	2.2815e-56
C14orf2	1.60007	5.96664	471.493	1.64726e-67	1.78549e-66
C16orf63	1.17971	6.06153	1385.98	1.95539e-102	6.57372e-101
C16orf7	1.9515	5.67956	494.107	1.27556e-69	1.47836e-68
C17orf56	1.53646	5.79027	430.182	1.6408e-63	1.60239e-62
C18orf56	-1.12093	6.23717	2076.6	3.75177e-96	1.00676e-94
C19orf36	-1.19712	6.31494	3102.72	5.85385e-115	3.60254e-113
C19orf63	1.07679	6.25633	3879.88	3.22903e-101	1.04317e-99
C1orf103	1.26372	5.94718	920.713	1.99158e-101	6.47613e-100
C1orf21	1.58909	6.041	447.08	3.60423e-65	3.66902e-64
C1orf226	1.06329	6.01353	587.935	8.34373e-78	1.23522e-76
C1orf95	-1.20503	6.3123	837.939	3.56067e-96	9.57203e-95
C2	1.93427	5.8455	624.646	8.77712e-81	1.43488e-79
C20orf196	1.06296	5.61043	122.439	1.04509e-24	3.84499e-24
C20orf199	1.3727	6.08804	1783.39	1.46397e-138	2.8688e-136
C20orf26	-1.38011	6.2497	1352.63	3.13658e-124	3.03332e-122
C21orf15	-1.43307	6.20521	971.228	1.86428e-104	6.80508e-103
C21orf2	2.73205	5.61224	616.898	3.61696e-80	5.79218e-79
C22orf30	1.28698	6.06527	430.365	1.58598e-63	1.54987e-62
C2orf29	2.13149	5.87582	756.184	1.25946e-90	2.71056e-89
C2orf55	1.25599	5.88153	606.982	2.28758e-79	3.53779e-78
C3orf21	1.13096	5.93032	308.848	2.05759e-50	1.44478e-49
C4orf3	2.99172	5.86535	1148.54	2.85782e-114	1.67565e-112
C4orf40	-2.75822	5.38451	481.987	1.69063e-68	1.88321e-67
C4orf41	1.29169	6.03023	767.077	2.14417e-91	4.76615e-90
C4orf7	-1.02592	6.19047	211.613	4.60096e-38	2.40175e-37
C5orf13	1.64184	6.00715	755.051	1.51319e-90	3.24726e-89
C5orf20	-1.03768	6.08075	620.151	8.44076e-74	1.11443e-72
C5orf41	1.41047	5.83052	449.041	2.30476e-65	2.36234e-64
C6	-1.44676	6.20057	620.337	1.93943e-80	3.14639e-79
C6orf124	1.00855	5.31083	96.341	2.57114e-20	8.23306e-20
C6orf129	1.58558	5.78724	436.019	4.33544e-64	4.28736e-63
C6orf130	1.49295	5.85727	547.246	2.32366e-74	3.11769e-73
C6orf145	1.10235	5.97802	733.278	3.57613e-84	6.51889e-83
C6orf15	-1.87476	6.04771	924.251	1.23161e-101	4.05806e-100
C6orf153	1.31333	6.0033	573.963	1.23624e-76	1.75848e-75
C6orf176	-1.47893	5.8996	571.202	2.08826e-76	2.95914e-75
C6orf211	1.02855	6.19171	1483	4.19332e-88	8.51993e-87
C6orf223	-1.02209	5.80183	287.036	8.25556e-48	5.4815e-47
C6orf62	1.01437	6.31144	556.91	3.45806e-75	4.74225e-74
C6orf89	1.24213	6.18701	1867.16	5.16004e-125	5.12323e-123
C7orf41	1.59305	5.91871	239.453	8.37427e-42	4.77116e-41
C8orf34	-1.02071	5.61929	389.027	1.93572e-48	1.30388e-47
C8orf83	1.10378	6.0417	403.803	7.6729e-61	7.04516e-60
C9orf122	-1.13733	6.23137	703.757	7.5279e-87	1.4713e-85
C9orf72	1.51964	5.73497	408.038	2.80261e-61	2.59896e-60
C9orf91	1.10258	6.10291	647.157	1.47495e-82	2.57218e-81
CA14	-1.50569	6.3078	2919.75	1.50241e-169	2.03413e-166
CA3	-1.32376	6.32313	834.335	6.1379e-96	1.62944e-94
CABC1	1.09059	6.10766	821.611	7.40842e-92	1.68191e-90
CACNA1G	-1.40641	6.2408	1443.09	2.85998e-128	3.38045e-126
CACNA1I	-1.00718	6.19245	875.302	1.25819e-76	1.788e-75
CACNB3	1.16857	6.02502	416.075	4.29725e-62	4.05827e-61
CACNG1	-1.49368	6.16673	700.112	1.39998e-86	2.72191e-85
CACNG6	-1.78126	5.68179	385.419	6.24482e-59	5.43566e-58
CAD	3.45155	5.74086	1130.51	2.51135e-113	1.42211e-111
CADM2	-1.2111	6.00112	470.144	2.20929e-67	2.386e-66
CALM2	1.15649	6.40495	545.186	3.54191e-74	4.72667e-73
CALML3	-1.07486	6.42827	506.314	9.89738e-71	1.17827e-69
CALR	1.19694	6.45274	1438.64	4.47314e-128	5.24554e-126
CAMK1	1.21523	5.80086	616.754	3.71487e-80	5.93621e-79
CAMK2D	1.23243	6.00543	484.658	9.62249e-69	1.08075e-67
CAMK4	-1.07028	6.14281	1933.83	4.81229e-82	8.24735e-81
CAMP	-1.63679	6.29635	1260.66	6.74731e-120	5.23373e-118
CAMSAP1	1.19846	6.04799	547.543	2.21321e-74	2.97217e-73
CAPN2	1.10122	6.30721	612.252	8.66644e-80	1.37167e-78
CAPSL	-1.31622	5.94405	458.903	2.58153e-66	2.72672e-65
CARTPT	-2.17227	5.51769	324.395	3.20271e-52	2.33813e-51
CASKIN1	-1.02961	6.29138	1354.7	2.58374e-86	4.97796e-85
CASP14	-1.44666	5.78483	203.218	6.71047e-37	3.41205e-36
CASP8	1.16338	5.98757	801.984	8.64499e-94	2.11065e-92
CASQ1	-1.24764	6.18486	1031.13	6.54139e-108	2.82379e-106
CBS	2.13385	5.62626	464.042	8.31332e-67	8.87529e-66
CCDC114	1.14749	5.35453	172.439	1.77193e-32	8.11479e-32
CCDC129	-1.39484	5.71561	333.766	2.73537e-53	2.06163e-52
CCDC144A	-1.1594	6.13443	971.01	6.90674e-94	1.6946e-92
CCDC159	1.99577	5.62696	419.011	2.15414e-62	2.05257e-61
CCDC61	4.20408	5.35851	1596.06	1.12894e-134	1.84762e-132
CCDC65	-1.15997	6.1396	1446.72	2.28717e-94	5.69612e-93
CCDC88C	1.03292	6.14185	2416.25	2.79285e-85	5.22537e-84
CCL11	-1.29824	6.38882	2088.13	1.69766e-140	3.77361e-138
CCL13	-1.39234	6.30354	1453.8	9.81295e-129	1.18817e-126
CCL20	-1.37201	6.17202	1151.09	2.10663e-114	1.24996e-112
CCNA1	-1.32826	6.03656	1097.05	9.58327e-110	4.60399e-108
CCNB3	-1.01912	6.23417	1229.37	6.09254e-81	9.99297e-80
CCNK	1.61958	5.96904	558.494	2.5315e-75	3.48443e-74
CCT4	2.27488	6.01489	870.31	2.87471e-98	8.3783e-97
CCT6A	1.68454	6.14977	1006.98	1.54944e-106	6.39221e-105
CD14	1.48131	6.0122	519.049	7.07385e-72	8.78656e-71
CD151	1.16884	6.31757	4650.51	4.73658e-124	4.55109e-122
CD164	1.13523	6.38147	2937.96	1.32947e-123	1.23749e-121
CD177	-1.51442	6.30469	1090.17	3.57564e-111	1.8237e-109
CD40LG	-1.38427	6.4183	2135.68	8.76547e-154	4.2111e-151
CD72	-1.10025	6.62878	5214.16	8.81491e-127	9.58251e-125
CD74	1.12724	6.53196	1122.71	6.48051e-113	3.56141e-111
CD8B	-1.04682	6.48522	2195.32	1.11337e-103	3.93858e-102
CDC37	1.1569	6.21927	3579.3	2.09482e-112	1.11422e-110
CDCA7	1.01125	5.71143	244.921	1.61232e-42	9.3798e-42
CDH10	-3.13494	5.72288	1275.18	1.31299e-120	1.05131e-118
CDH19	-2.44091	5.99023	779.256	3.12007e-92	7.17086e-91
CDH6	1.39524	5.50929	220.664	2.66595e-39	1.42615e-38
CDH7	-2.19115	6.09784	918.682	2.70146e-101	8.74627e-100
CDR1	-1.41229	6.14285	1580.47	4.51319e-133	6.65494e-131
CECR5	2.34835	5.7411	622.567	1.28617e-80	2.09344e-79
CEL	-1.14502	6.30556	1584.58	1.73283e-105	6.75575e-104
CELF5	-1.17626	6.12013	640.806	4.62775e-82	7.94021e-81
CETN2	1.168	6.13947	2336.79	3.23284e-107	1.3678e-105
CFL2	1.52441	5.79339	226.352	4.57696e-40	2.4987e-39
CFP	-1.18664	6.33862	2977.95	2.32304e-115	1.45365e-113
CFTR	-1.46818	5.76499	272.375	5.24785e-46	3.35434e-45
CGA	-1.27586	5.91874	194.246	1.23051e-35	6.0904e-35
CHCHD10	1.56077	5.81868	599.277	9.71676e-79	1.47816e-77
CHEK1	1.96361	5.6453	481.718	1.79108e-68	1.99213e-67
CHGA	-2.16579	5.9474	641.619	3.9963e-82	6.88057e-81
CHGB	-1.29708	5.87587	274.461	2.8919e-46	1.85803e-45
CHMP4A	1.43264	5.99867	978.897	6.47654e-105	2.4296e-103
CHRDL2	-1.34682	6.02184	812.248	1.76331e-94	4.42849e-93
CHRNA9	-2.35268	6.04505	1122.31	6.80066e-113	3.72361e-111
CHRNB2	-1.06239	6.1196	883.599	1.88549e-79	2.92203e-78
CHST4	-1.76546	5.92223	820.013	5.34555e-95	1.37025e-93
CHST6	-1.13749	6.44539	1796.57	1.57555e-116	1.04753e-114
CHURC1	2.01672	5.89778	698.212	1.93616e-86	3.74484e-85
CIDEA	-1.58927	6.30479	625.204	7.92314e-81	1.2967e-79
CKM	-2.12818	6.01204	1754.56	8.63541e-141	1.97857e-138
CKMT2	-1.60318	6.35663	2488.03	3.77334e-164	3.74642e-161
CLDN10	-2.13056	6.09287	1328.99	3.86758e-123	3.46987e-121
CLDN11	-1.02462	6.61202	3070.82	3.90434e-110	1.89405e-108
CLDN6	-1.81572	5.5931	685.558	1.68073e-85	3.17252e-84
CLDN9	-1.18842	6.211	1901.11	2.26749e-104	8.21649e-103
CLEC3A	-1.06264	6.24523	132.752	2.24675e-26	8.71378e-26
CLTA	1.09206	6.21828	1076.16	8.66726e-101	2.78193e-99
CLTC	1.07772	6.44463	3621.66	7.89541e-118	5.57281e-116
CNGA1	-1.46325	6.2986	1437.34	5.09851e-128	5.93219e-126
CNN2	1.1268	6.23137	517.351	1.00344e-71	1.23609e-70
CNNM1	-1.2933	6.15215	1097.83	1.35567e-111	6.98615e-110
CNOT6L	1.06247	6.12264	972.555	1.55766e-88	3.22197e-87
CNR1	-1.61172	6.60782	2473.38	9.58754e-164	8.9242e-161
CNST	1.10867	6.06716	2017.14	1.25792e-91	2.82994e-90
CNTN1	-1.31712	6.65682	1623.25	9.58133e-136	1.62153e-133
CNTN3	-1.23514	6.43816	1750.66	5.78657e-134	8.88448e-132
CNTROB	1.02428	6.05893	455.578	5.42435e-66	5.66911e-65
COCH	-1.29979	6.49061	1418.05	3.58085e-127	4.00974e-125
COL11A2	-1.28264	6.19366	1303.14	1.42091e-117	9.93505e-116
COL4A1	1.21474	6.34345	1066.19	7.27841e-110	3.50801e-108
COL4A4	-1.12536	6.46507	2172.82	4.03599e-116	2.61339e-114
COL4A6	-1.22627	6.50482	1379.37	1.90773e-125	1.91971e-123
COL6A3	2.89628	6.10072	1410.64	7.62121e-127	8.34579e-125
COL9A1	-2.50792	6.06181	979.641	5.97066e-105	2.25117e-103
COL9A3	-1.08259	6.48021	944.485	7.30161e-103	2.48855e-101
COMMD6	1.93852	5.89687	820.026	5.4223e-95	1.38753e-93
COMMD9	2.14205	5.81068	1020.51	2.56196e-107	1.08704e-105
COX4NB	1.13818	5.96434	849.317	2.4091e-88	4.94197e-87
CPA6	-1.93609	6.13558	1155.13	1.2989e-114	7.76888e-113
CPEB3	2.27761	5.53371	688.898	9.44151e-86	1.78896e-84
CPLX2	-3.0471	6.12742	1277.02	1.09829e-120	8.88957e-119
CPSF1	1.16565	6.16403	1090.52	5.5315e-109	2.54261e-107
CPT1A	1.46453	6.07315	416.021	4.35127e-62	4.10668e-61
CR1	-1.001	6.25231	780.706	1.57497e-79	2.44588e-78
CR2	-1.43652	6.14378	562.971	1.05096e-75	1.46143e-74
CREB5	2.29409	5.43029	317.498	2.00196e-51	1.4293e-50
CREBBP	1.6436	6.08556	967.127	3.25632e-104	1.17141e-102
CRHR1	-1.58506	6.19784	1023.43	1.78399e-107	7.6129e-106
CRIP2	1.117	6.24572	613.839	6.45351e-80	1.02684e-78
CRISPLD2	1.2116	6.10518	1339.24	1.30835e-111	6.76572e-110
CROT	1.08082	5.98879	954.257	7.53859e-82	1.27437e-80
CRTAC1	-1.03412	6.1905	738.434	3.27874e-80	5.26755e-79
CRYM	-1.48837	6.28501	779.878	2.82706e-92	6.50748e-91
CSAG1	-2.57597	5.74747	820.747	4.77777e-95	1.23106e-93
CSAG3	1.33676	4.64432	53.0795	2.02505e-12	4.91429e-12
CSF2RA	2.5803	5.44926	470.729	1.92812e-67	2.08689e-66
CSMD3	-2.77035	5.86517	957.944	1.1422e-103	4.03098e-102
CSN2	-4.44742	5.88053	2363.92	1.14173e-160	8.09708e-158
CSN3	-3.14368	5.88359	949.354	3.724e-103	1.2898e-101
CSNK1G1	1.02157	6.0697	866.053	1.01157e-78	1.53728e-77
CSNK1G3	2.32306	5.77775	985.71	2.58772e-105	9.95839e-104
CSRP3	-3.98536	5.28784	809.563	2.66909e-94	6.62513e-93
CST4	-1.20548	6.14253	446.822	3.81857e-65	3.88191e-64
CST5	-1.81129	5.92557	408.927	2.29054e-61	2.13206e-60
CST9	-1.20861	6.03905	201.293	1.24771e-36	6.32047e-36
CSTA	1.86585	5.54261	307.469	2.97369e-50	2.07726e-49
CSTB	3.03881	5.88114	1155.96	1.17674e-114	7.09522e-113
CTBP2	1.07598	6.21225	1069.02	1.55348e-97	4.37352e-96
CTH	-1.00611	6.5152	5899.33	7.7722e-99	2.31967e-97
CTLA4	-1.2351	6.44199	2119.1	2.3119e-134	3.70228e-132
CTNNBIP1	1.38771	6.00109	460.656	1.76555e-66	1.87548e-65
CTNND2	1.92663	5.51903	325.945	2.12739e-52	1.56152e-51
CTPS	1.10108	6.03527	497.155	6.76155e-70	7.88566e-69
CTSC	1.64305	6.01601	732.823	5.76173e-89	1.20013e-87
CTSG	-1.20505	6.25582	858.557	1.6295e-97	4.57028e-96
CUBN	-1.03981	6.34219	4923.78	1.72566e-91	3.84733e-90
CUL5	1.12521	6.05479	733.614	4.98296e-89	1.04083e-87
CUX2	-1.3524	6.02443	656.775	2.62407e-83	4.65796e-82
CXADRP3	-1.21529	5.91595	306.541	3.84519e-50	2.67725e-49
CXCL10	1.12721	5.98431	271.948	5.93023e-46	3.78401e-45
CXCL2	-1.24362	6.29426	1426.36	7.18395e-121	5.87861e-119
CXCL5	-1.77936	6.13063	975.786	1.00517e-104	3.72387e-103
CXCR5	-1.19074	6.28015	1508.97	9.56288e-111	4.77919e-109
CXorf57	-1.11294	6.27326	1762.67	9.69505e-98	2.75026e-96
CXorf61	-2.55477	5.65785	455.078	6.06073e-66	6.32533e-65
CYC1	1.62403	6.0757	438.681	2.38944e-64	2.37398e-63
CYLD	2.35792	5.83819	684.851	1.92492e-85	3.62425e-84
CYP11A1	-1.20358	6.14508	1236.68	3.84791e-101	1.24041e-99
CYP24A1	-1.86626	6.14191	944.43	7.35764e-103	2.50176e-101
CYP26A1	-1.16389	6.21776	685.621	1.6848e-85	3.17617e-84
CYP2A7	-1.51221	5.7987	244.373	1.90675e-42	1.10667e-41
CYP2J2	1.22639	5.73883	262.531	8.94104e-45	5.54136e-44
CYP4F12	-1.07469	5.88547	387.257	4.00026e-59	3.49418e-58
CYTL1	-1.13485	6.18807	2179.8	1.90068e-94	4.76547e-93
DAD1	1.24489	6.19178	3223.1	5.09929e-126	5.31075e-124
DAPK3	1.17889	6.06802	588.445	7.65799e-78	1.13709e-76
DAPL1	-1.52148	5.9465	562.094	1.24805e-75	1.73065e-74
DAPP1	1.07626	5.85251	439.051	2.1797e-64	2.16849e-63
DCD	-2.09957	6.06834	430.601	1.50281e-63	1.46955e-62
DCTD	1.59732	6.01812	550.779	1.16307e-74	1.57326e-73
DCTN5	1.0049	6.19293	3259.48	2.12972e-84	3.90134e-83
DDC	-2.06747	5.892	619.932	2.08975e-80	3.37923e-79
DDIT4L	-1.01387	6.30232	1722.42	1.06498e-84	1.97028e-83
DDX18	1.07865	6.18278	818.294	7.07095e-95	1.794e-93
DDX24	1.82279	6.06119	811.394	2.04386e-94	5.11582e-93
DDX3Y	-4.16947	5.71147	1831.07	1.39959e-143	3.86001e-141
DENND5B	1.31704	5.79349	174.728	8.15865e-33	3.7735e-32
DGKD	1.02974	6.1079	1638.01	1.83463e-82	3.18824e-81
DHDH	-1.179	6.07525	1179.56	4.14613e-92	9.49975e-91
DHRS4L2	3.45009	5.53559	1159.83	7.26121e-115	4.43202e-113
DHRS9	-1.02333	6.25286	1263.02	8.88817e-83	1.55183e-81
DHX15	1.31696	6.18041	997.699	5.30932e-106	2.11422e-104
DHX34	1.06284	6.02011	821.841	2.0839e-81	3.47153e-80
DHX38	1.05741	6.11206	1849.86	5.53147e-87	1.08395e-85
DIO3	-1.37178	6.21407	1143.95	4.95599e-114	2.86084e-112
DIP2B	1.40496	6.0612	759.343	7.55713e-91	1.64304e-89
DIP2C	1.13523	6.04508	468.548	3.12883e-67	3.36688e-66
DLG3	1.61796	6.03414	775.491	5.67554e-92	1.2984e-90
DLG4	1.15833	5.83581	287.488	7.27489e-48	4.83467e-47
DLK1	-1.07574	5.38839	93.2786	8.7575e-20	2.75974e-19
DLX3	1.13139	5.54792	198.102	3.49483e-36	1.75248e-35
DMBT1	-1.64533	5.86204	586.071	1.19106e-77	1.74935e-76
DMC1	-1.02347	6.07209	1103.22	1.69852e-71	2.08026e-70
DMRT2	-1.19065	6.06173	1065.21	1.13275e-92	2.64008e-91
DNAH11	-1.61773	6.20798	843.28	1.59337e-96	4.35414e-95
DNAI1	-1.27037	6.13563	758.959	8.04093e-91	1.74568e-89
DNAJB1	1.02238	6.29843	2672.02	6.18272e-95	1.574e-93
DNAJC14	2.41314	5.84695	606.059	2.75094e-79	4.23679e-78
DNAJC3	1.29391	6.14871	898.675	4.67144e-100	1.44941e-98
DNAJC4	5.22684	5.54971	3747.8	6.40875e-193	2.38614e-189
DNAJC5	1.31751	6.14709	856.743	2.13277e-97	5.9482e-96
DNASE1L3	-1.44485	6.22331	1335.88	1.85429e-123	1.71528e-121
DNER	-1.35573	5.94641	508.476	6.24547e-71	7.5193e-70
DNPEP	1.40346	6.0807	690.298	7.52044e-86	1.43042e-84
DOC2B	-1.29664	6.19371	1143.87	5.00276e-114	2.87669e-112
DPYD	1.52432	5.81699	353.559	1.69691e-55	1.35726e-54
DPYSL2	1.64013	6.00746	1115.14	1.60023e-112	8.54203e-111
DPYSL5	-2.30844	6.04611	869.891	3.05726e-98	8.85831e-97
DRD2	-1.72804	6.27184	1495.03	1.68884e-130	2.18712e-128
DRG1	3.70534	5.70308	1815.51	5.07483e-143	1.34963e-140
DRP2	-1.0239	6.19802	1572.25	2.80251e-79	4.31176e-78
DSCAML1	-1.3549	6.07833	1081.35	1.05403e-110	5.21516e-109
DSG1	-1.96159	6.36746	1088.11	4.62184e-111	2.34126e-109
DSG2	1.14108	6.22986	492.838	1.68453e-69	1.94478e-68
DUOXA1	-1.14361	6.0841	675.08	1.03818e-84	1.92308e-83
DUSP5	1.35043	6.02295	611.745	9.52345e-80	1.49929e-78
DUSP9	-1.59284	6.22555	840.397	2.4583e-96	6.65662e-95
DYDC2	-1.42136	6.14974	1063.68	1.00088e-109	4.79295e-108
DYNC1I1	-1.10353	6.29948	2312.17	2.52938e-98	7.44467e-97
DYNLRB2	-1.207	6.27573	1278.21	5.17433e-113	2.85412e-111
DYRK2	2.75566	5.70642	1048.73	6.60533e-109	3.02687e-107
EDN3	-1.82396	6.17976	654.681	3.84178e-83	6.76307e-82
EFHA2	-1.15855	6.33533	2551.38	2.69049e-110	1.30946e-108
EFHC2	-1.15951	6.26697	1233.8	1.44417e-104	5.32376e-103
EFHD2	1.21628	6.07711	745.112	7.63385e-90	1.61953e-88
EHD2	2.60339	5.85709	760.772	6.00094e-91	1.31044e-89
EHD3	1.46186	5.80134	447.995	2.9126e-65	2.97105e-64
EHMT2	1.10137	6.1802	2268.74	2.72352e-99	8.27782e-98
EIF2AK2	2.41876	5.72434	604.587	3.6243e-79	5.56461e-78
EIF2C4	2.9576	5.57039	901.295	3.15183e-100	9.86139e-99
EIF3CL	4.15707	5.94679	1690.04	2.40886e-138	4.54117e-136
EIF3G	1.03233	6.22825	1484.1	2.21153e-91	4.90853e-90
EIF3H	1.73139	6.16854	922.195	1.64513e-101	5.36124e-100
EIF3K	1.3124	6.18034	474.876	7.90542e-68	8.65702e-67
EIF4G2	1.33639	6.39993	2076.48	6.71433e-152	2.77768e-149
ELAVL2	-1.18573	6.36837	1347.92	5.67374e-118	4.04302e-116
ELMO1	1.01568	5.95189	390.167	1.98057e-59	1.74125e-58
EMB	1.59853	5.89469	526.823	1.43997e-72	1.82514e-71
EMID2	-1.04503	5.83791	494.826	5.0574e-61	4.67245e-60
EMP1	1.65524	6.0904	726.802	1.56405e-88	3.2307e-87
EMX2	-1.22385	6.29246	2164.16	2.32358e-117	1.60954e-115
EN1	-1.0834	6.56718	1358.62	1.46666e-117	1.0207e-115
EPDR1	1.18383	5.80107	208.008	1.44697e-37	7.45408e-37
EPHA8	-1.75336	6.11119	835.672	5.01405e-96	1.34065e-94
EPHX2	1.82669	5.80149	757.86	9.46049e-91	2.04492e-89
EPO	-1.99498	6.02507	1022.76	1.94769e-107	8.28768e-106
EPT1	1.27354	6.09101	1380.7	5.30909e-121	4.36841e-119
ERBB4	1.32836	5.83639	296.149	6.6022e-49	4.47346e-48
ERCC1	1.56495	5.96051	834.55	5.84541e-96	1.55735e-94
EREG	-1.34198	5.97424	491.639	2.17273e-69	2.49487e-68
ERLEC1	1.35526	6.11095	1006.29	1.69775e-106	6.98469e-105
ERVFRDE1	-2.11637	6.00087	1846.64	3.89143e-144	1.09349e-141
ESRP2	1.03323	6.13985	1003.11	3.45268e-85	6.44371e-84
ESYT1	1.47439	6.14558	842.192	1.87652e-96	5.10914e-95
ETAA1	3.40993	5.5496	1235.29	1.14119e-118	8.5837e-117
EWSR1	1.01197	6.3169	1119.69	1.68398e-94	4.24357e-93
EXOSC6	1.01766	5.91776	597.736	7.18975e-69	8.11189e-68
EYA1	-1.44074	6.06586	786.337	1.01804e-92	2.37644e-91
EYA4	-1.64791	6.10474	972.68	1.53104e-104	5.63005e-103
FABP4	1.02395	5.86893	112.528	4.54461e-23	1.58768e-22
FABP6	-1.87444	5.93853	590.089	5.59939e-78	8.34751e-77
FAM102B	1.92141	5.89772	1557.75	4.03209e-133	6.00499e-131
FAM107B	1.20144	6.14629	774.529	6.61533e-92	1.50415e-90
FAM114A1	1.48499	5.93687	525.13	2.03427e-72	2.56532e-71
FAM134C	1.16598	6.17661	1034.33	4.31972e-108	1.88661e-106
FAM135B	-1.36717	6.16362	619.65	2.20155e-80	3.55614e-79
FAM167A	1.15703	5.64602	164.196	2.99873e-31	1.33673e-30
FAM168B	1.08169	6.22165	1018.4	2.88155e-99	8.72254e-98
FAM174A	1.15852	5.9172	517.879	8.91214e-72	1.10057e-70
FAM177B	-1.67166	5.98751	774.772	6.36367e-92	1.45359e-90
FAM181B	-1.45497	5.95924	762.233	4.67142e-91	1.02764e-89
FAM184B	-1.09347	6.09206	457.273	3.72668e-66	3.91683e-65
FAM189A1	-1.08489	6.03084	466.416	4.94146e-67	5.29828e-66
FAM190A	2.83933	5.22229	456.568	4.31855e-66	4.53569e-65
FAM19A3	-1.54892	6.0694	1299.57	9.04326e-122	7.65234e-120
FAM20A	1.3065	5.75093	487.872	4.79783e-69	5.44205e-68
FAM21B	1.62578	5.87895	586.387	1.13412e-77	1.66902e-76
FAM36A	1.01342	6.13389	782.308	9.86083e-82	1.65753e-80
FAM3D	-1.1229	5.90171	357.598	6.0754e-56	4.9121e-55
FAM54B	1.01588	6.09517	1315.74	1.51766e-79	2.35935e-78
FAM57B	-1.21803	6.21477	1417.35	2.6147e-109	1.22455e-107
FAM5B	-1.2314	6.2728	511.347	3.47238e-71	4.20782e-70
FAM63A	1.13133	6.06776	1102.73	3.25152e-95	8.42172e-94
FANCB	-1.10348	6.36317	3080.63	1.90892e-103	6.67359e-102
FAS	1.27241	5.82544	505.017	1.28523e-70	1.52395e-69
FBN1	1.17309	6.27445	1278.3	1.22786e-120	9.88458e-119
FBN3	-1.10685	5.82993	296.895	5.34895e-49	3.62924e-48
FBXL7	1.32009	5.93598	640.49	4.83891e-82	8.27586e-81
FBXO43	-1.03552	6.21202	2657.19	8.13406e-82	1.37347e-80
FBXW4	1.74576	5.95809	867.757	4.1845e-98	1.20077e-96
FCGR3A	1.0386	6.16686	643.52	2.8367e-82	4.90104e-81
FCGR3B	-1.45173	6.2584	1509.27	4.24153e-131	5.59018e-129
FCRLA	-1.19529	6.22297	1045.55	1.83843e-106	7.5219e-105
FEN1	2.22566	5.81469	516.924	1.0958e-71	1.34873e-70
FGB	-1.65323	5.7527	305.506	5.09339e-50	3.5364e-49
FGD1	1.43722	5.86616	367.907	4.63251e-57	3.83928e-56
FGD4	1.07796	5.89265	460.402	1.85126e-66	1.96513e-65
FGG	-2.40536	5.99544	791.383	4.6026e-93	1.0915e-91
FGL1	-2.20458	5.87822	859.705	1.35142e-97	3.81186e-96
FGR	1.1175	5.77325	442.389	1.0257e-64	1.0266e-63
FIGF	-1.40829	6.16283	1001.66	3.13771e-106	1.26984e-104
FKBP4	1.36164	6.29235	626.866	5.84169e-81	9.60268e-80
FKBP5	1.36387	6.07551	1334.19	2.1658e-123	1.99107e-121
FKBP9	1.78163	6.07284	801.982	8.78383e-94	2.14104e-92
FLNA	1.17926	6.42313	944.484	7.30207e-103	2.48855e-101
FMO4	-1.10448	6.7247	5505.38	1.77241e-137	3.14244e-135
FN1	1.0612	6.62751	3999.63	4.52715e-132	6.12936e-130
FNDC1	1.03629	6.11568	1740.86	5.46913e-84	9.89694e-83
FOXA3	-2.00667	6.21562	1329.02	3.85592e-123	3.46987e-121
FOXC2	-1.24344	6.1332	1217.94	4.97474e-106	1.98629e-104
FOXJ1	-1.21444	6.25332	588.431	7.67825e-78	1.13897e-76
FOXM1	1.29371	6.0103	948.258	4.25295e-103	1.46618e-101
FOXN3	1.7341	5.94533	774.636	6.50322e-92	1.48092e-90
FUBP3	1.4484	6.01773	730.879	7.94908e-89	1.64883e-87
FUS	1.6667	6.16405	880.862	6.14134e-99	1.8403e-97
FUT6	-1.18421	6.06988	436.159	4.23402e-64	4.18985e-63
FXYD1	-1.20178	6.23267	912.245	6.72576e-101	2.16343e-99
FZD9	-1.47075	6.23166	1232.43	1.6155e-118	1.197e-116
GAA	3.79155	5.81649	1821.2	3.16597e-143	8.57288e-141
GAB1	2.85565	5.70409	1036	3.40807e-108	1.50073e-106
GABBR2	-2.16927	6.21395	840.927	2.26966e-96	6.15702e-95
GABRB3	2.74176	5.05938	353.492	1.71544e-55	1.37134e-54
GABRP	3.89881	5.42929	810.914	2.16634e-94	5.40425e-93
GAD1	-1.55756	6.18921	977.638	7.82501e-105	2.92809e-103
GAL	-1.0227	6.0145	437.837	2.86996e-64	2.84569e-63
GATA3	2.5341	6.03248	820.693	4.89519e-95	1.25914e-93
GATA4	-1.72431	5.69675	360.427	2.98156e-56	2.42779e-55
GATAD1	1.1147	6.0738	1213.81	4.50189e-93	1.06933e-91
GCDH	5.2001	5.51189	3679.12	1.35043e-191	4.02238e-188
GCM1	-1.5808	6.09709	1050.36	5.46968e-109	2.52198e-107
GCNT4	-1.01358	6.22558	1446.37	1.33009e-79	2.08078e-78
GDF5	-1.31999	6.13594	831.178	9.90439e-96	2.62e-94
GDPD2	-1.89058	5.97363	844.911	1.24736e-96	3.43381e-95
GFM1	1.07709	6.15474	1551.76	2.9335e-93	7.03521e-92
GIPR	-1.45787	6.26778	1291.17	2.31727e-121	1.92799e-119
GJB6	-1.47866	5.71944	391.463	1.44927e-59	1.27792e-58
GLDC	-1.04663	6.23457	537.788	1.56158e-73	2.04544e-72
GLG1	1.29908	6.22249	1945.5	7.98133e-140	1.69809e-137
GLRA3	-1.81172	5.99043	471.884	1.51303e-67	1.64358e-66
GLT25D2	-1.04128	6.2824	2284.76	1.91677e-87	3.81637e-86
GLTSCR2	1.90408	6.08063	479.059	3.20276e-68	3.54374e-67
GMIP	3.40047	5.59082	1044.16	1.18927e-108	5.36723e-107
GNG3	-1.65357	6.16825	2219.82	2.11105e-156	1.25759e-153
GNL3L	2.32542	5.79181	532.688	4.37365e-73	5.64443e-72
GNLY	-1.02254	6.46554	2042.02	7.07341e-98	2.01423e-96
GOT2	1.33701	6.15578	1662.93	2.594e-137	4.54499e-135
GP1BA	-1.22402	6.20576	1329.92	1.90592e-109	9.01105e-108
GPD2	1.50411	6.05615	695.911	2.86977e-86	5.51478e-85
GPIHBP1	1.16087	5.4645	98.4772	1.09909e-20	3.56384e-20
GPR109B	-1.06154	6.22877	1718.36	1.08961e-86	2.12403e-85
GPR110	-1.0104	5.84537	259.094	2.43575e-44	1.48854e-43
GPR172B	-1.07578	6.19893	1013.96	1.17216e-86	2.28196e-85
GPR26	-1.1024	5.82475	248.575	5.41878e-43	3.20246e-42
GPR37L1	-1.10711	6.03505	689.847	9.59048e-80	1.50825e-78
GPR4	1.59722	5.68214	351.732	2.68145e-55	2.13327e-54
GPR55	-1.20528	6.12325	1232.9	1.35748e-99	4.15132e-98
GPR75	-1.22352	6.33591	4092.03	1.81943e-121	1.52229e-119
GPR87	-1.07942	6.07237	610.252	1.25726e-78	1.90288e-77
GPR88	-1.6896	6.11971	1363.86	9.62847e-125	9.49647e-123
GPRC5A	1.80935	6.04659	1189.1	2.36205e-116	1.54969e-114
GPX2	-1.38365	6.30466	943.391	8.49655e-103	2.88244e-101
GRB14	1.26297	5.43048	137.014	4.70021e-27	1.85776e-26
GREB1	1.25362	5.99966	351.149	3.12884e-55	2.48654e-54
GREM1	4.16515	5.57603	1449.21	1.50952e-128	1.79851e-126
GRHL1	1.12384	6.03962	712.577	1.66875e-87	3.33593e-86
GRIA3	-1.55601	6.37488	2005.03	1.45574e-149	5.55907e-147
GRIA4	-1.17525	5.83645	223.064	1.26693e-39	6.85124e-39
GRIK1	-1.37145	5.34446	224.669	7.67598e-40	4.17068e-39
GRIN1	-1.33255	6.40346	2100.15	1.05785e-148	3.84257e-146
GRIN2A	-1.12316	6.16984	895.524	2.2769e-91	5.04612e-90
GRIN2C	-1.31188	6.31331	1986.67	1.12566e-134	1.84762e-132
GRINA	1.58131	6.21697	998.989	4.47213e-106	1.80009e-104
GRM4	-1.19746	6.50608	1423.02	2.1629e-127	2.44031e-125
GRN	1.42533	6.27336	2364.89	1.11193e-160	8.09708e-158
GRPR	-1.10724	6.46498	629.424	3.65868e-81	6.04758e-80
GRWD1	1.10587	6.07675	1187.42	6.43619e-92	1.4679e-90
GSN	1.94845	6.1467	724.092	2.45587e-88	5.03098e-87
GSTA1	-1.66997	6.13492	503.299	1.85879e-70	2.19358e-69
GSTA2	-2.32861	5.88026	858.031	1.76167e-97	4.93167e-96
GTF2I	1.02365	6.25292	1928.68	9.64027e-92	2.17534e-90
GTF3A	1.08687	6.21397	2627.15	1.528e-99	4.66322e-98
GUK1	1.17523	6.22705	1301.92	1.71102e-116	1.13254e-114
GYS1	1.17515	6.1098	1001.12	7.78221e-106	3.06615e-104
GZMH	-1.20656	6.42937	2114.15	1.10237e-127	1.26289e-125
GZMM	-1.28018	6.35028	2274.83	5.72464e-133	8.27739e-131
H19	1.04922	6.20918	2415.96	8.8144e-93	2.06729e-91
HABP2	-1.70201	6.10101	975.903	9.89305e-105	3.68343e-103
HADHA	1.86863	6.1058	656.185	2.93917e-83	5.21108e-82
HAMP	-1.12334	6.20204	1461.31	8.14465e-94	1.99176e-92
HAO2	-2.74545	6.04005	1810.86	7.71378e-143	1.98071e-140
HAUS3	1.05054	5.95903	682.502	1.08917e-75	1.51315e-74
HBA1	-1.45392	6.05505	415.042	5.46744e-62	5.15032e-61
HCFC1	1.17904	6.18249	981.515	4.63761e-105	1.76194e-103
HDC	-1.2049	6.29226	1468.44	3.54469e-114	2.05413e-112
HEXA	1.17201	6.17559	982.248	4.20168e-105	1.6004e-103
HINT3	1.18515	6.07209	1098.78	3.17349e-104	1.14438e-102
HIST1H2AE	-1.03118	6.55458	1411.36	1.53062e-106	6.33208e-105
HIST1H2BH	-1.34602	6.3326	1878.46	5.64752e-143	1.47559e-140
HIST1H3D	-1.21931	6.52137	1590.56	1.93333e-134	3.12968e-132
HIST2H2BF	1.06969	5.6468	558.794	7.20885e-60	6.40964e-59
HIVEP3	2.04324	5.7335	488.809	3.96597e-69	4.50879e-68
HLA-B	1.21108	6.47758	2016.31	6.16469e-150	2.48137e-147
HLA-L	-1.00514	6.34728	2729	1.95507e-86	3.77651e-85
HMGA1	1.84876	5.99122	891.995	1.22225e-99	3.74545e-98
HMP19	-2.05047	6.18043	1502.53	8.14759e-131	1.0644e-128
HNF1A	-1.0683	6.2311	4610.29	7.67051e-88	1.55424e-86
HNF4G	-1.33214	6.46486	1406.8	1.12765e-126	1.2082e-124
HNRNPH1	2.03119	6.06218	640.558	4.84004e-82	8.27586e-81
HNRNPH2	1.02387	6.2708	1978.01	4.13461e-93	9.83655e-92
HNRNPH3	1.10129	6.20635	3124.78	2.06358e-101	6.69562e-100
HNRNPK	1.44811	6.33716	3463.08	3.20763e-187	7.96186e-184
HNRNPU	1.25279	6.38569	3029.18	4.14811e-149	1.54445e-146
HNRPDL	1.03072	6.28848	5176.95	1.2192e-95	3.21372e-94
HORMAD1	-2.03602	6.01884	568.133	3.83468e-76	5.38773e-75
HOXB13	-1.63231	6.29755	401.612	1.28995e-60	1.17142e-59
HOXB2	1.04491	5.96274	666.365	3.66661e-75	5.02362e-74
HP	-1.10138	6.10378	517.549	9.63431e-72	1.18778e-70
HPD	-2.123	5.85454	1041.97	1.57567e-108	7.04699e-107
HPN	1.01291	6.02142	670.868	1.94353e-74	2.61472e-73
HS3ST2	-1.02162	6.32203	2209.99	3.16395e-87	6.25773e-86
HSD11B1	-1.03295	6.39947	2255.61	1.29753e-94	3.28083e-93
HSD17B14	2.48667	5.47855	906.714	1.45208e-100	4.63078e-99
HSD3B2	-2.53067	6.07454	1201.69	5.47113e-117	3.68695e-115
HSP90AB1	1.4124	6.44661	4991.18	2.9294e-195	1.45425e-191
HTR1D	-1.27378	6.17685	1029	8.62669e-108	3.71322e-106
HTR3A	-2.0313	5.87754	844.358	1.33307e-96	3.65626e-95
IFFO2	1.11058	6.00524	319.212	1.2742e-51	9.1454e-51
IGDCC3	-1.21496	6.05529	397.88	3.13632e-60	2.81381e-59
IGF2BP3	-1.25421	6.26261	1642.48	1.3954e-119	1.07677e-117
IGFBP3	1.17803	6.20257	422.189	1.03981e-62	9.96514e-62
IGSF3	1.25776	6.12324	1175.9	1.0849e-115	6.93449e-114
IKZF3	-1.01882	6.25025	838.915	5.94593e-82	1.01319e-80
IL10RB	1.13503	6.03807	725.682	1.85787e-88	3.81931e-87
IL12RB1	-1.04885	6.44141	2791.55	1.62149e-100	5.13804e-99
IL12RB2	-1.25556	6.40003	1320.73	9.38089e-123	8.36584e-121
IL1RL2	-1.07284	6.08546	579.482	4.21468e-77	6.10003e-76
IL22RA2	-1.67804	6.01726	733.762	4.93337e-89	1.03192e-87
IL24	-1.53935	6.1311	1380.17	1.71125e-125	1.73371e-123
ILK	1.20807	6.17591	1278.24	1.21808e-117	8.55701e-116
ILVBL	1.30778	6.05233	258.226	3.15283e-44	1.91967e-43
INA	-1.80395	5.9242	923.286	1.38547e-101	4.55493e-100
INCENP	5.44332	5.48439	4258.98	3.9715e-202	2.95738e-198
INE1	-1.04829	6.22273	4246.57	2.35267e-84	4.29919e-83
INO80C	1.31541	5.78294	511.036	3.66817e-71	4.44147e-70
INSM1	-1.51584	6.13756	577.881	5.80086e-77	8.36324e-76
INTS12	1.17585	5.96911	523.59	2.75941e-72	3.468e-71
IP6K3	-1.69658	5.72713	487.619	5.06447e-69	5.7314e-68
IQCB1	1.23576	5.93327	929.278	2.69084e-100	8.45458e-99
IRS4	-2.70643	5.71484	1051.72	4.50466e-109	2.08996e-107
IRX3	1.11947	6.12739	766.637	2.3362e-91	5.16217e-90
IRX4	-1.45254	6.36966	971.602	1.77194e-104	6.48391e-103
ITGB6	1.15095	6.03691	628.431	4.33396e-81	7.14791e-80
ITGBL1	1.37895	5.95587	597.065	1.47822e-78	2.23504e-77
ITIH2	-2.30226	6.06153	1130.46	2.52669e-113	1.42538e-111
ITM2B	1.27689	6.32941	2918.61	1.14431e-147	3.96331e-145
IVL	-2.54346	6.26488	1140.83	7.21382e-114	4.1163e-112
JARID2	1.46723	5.9601	1657.64	4.16471e-137	7.21221e-135
JSRP1	-1.3066	6.03365	442.715	9.60853e-65	9.62987e-64
JUN	1.38586	6.18793	1807.76	9.67854e-143	2.44309e-140
JUNB	1.65627	6.06661	1253.57	1.4899e-119	1.14377e-117
JUND	1.73348	6.05526	1088.41	4.452e-111	2.26292e-109
JUP	2.20777	6.12422	577.182	6.63674e-77	9.55909e-76
KBTBD10	-1.01408	6.26168	2861.63	5.09795e-82	8.69688e-81
KCMF1	2.2231	5.87353	611.831	9.37205e-80	1.47702e-78
KCNJ16	-1.59708	5.90885	511.965	3.05498e-71	3.70806e-70
KCNK17	-1.30588	6.06523	862.486	8.95374e-98	2.54481e-96
KCNQ3	-1.0178	6.10593	1219.11	8.87185e-73	1.13415e-71
KCTD1	1.12653	6.02911	553.004	7.40583e-75	1.00726e-73
KCTD15	1.94146	5.83533	864.258	6.89109e-98	1.96607e-96
KERA	-1.54412	6.35141	1709.85	4.23793e-139	8.64595e-137
KIAA0125	-1.16713	6.16969	737.887	2.49814e-89	5.2475e-88
KIAA0319	-1.54495	6.23311	1291	2.36126e-121	1.95368e-119
KIAA0319L	1.20554	6.19283	1057.26	2.26423e-109	1.06376e-107
KIAA1267	1.07149	6.11875	835.172	1.14316e-89	2.41679e-88
KIAA1984	-1.03546	6.09001	1290.62	4.44364e-74	5.90885e-73
KIF13B	1.46541	6.02902	946.606	5.34431e-103	1.83817e-101
KIF17	-1.03914	6.26923	4314.19	3.29734e-86	6.32825e-85
KIF19	-1.44125	6.14606	1302.11	6.86522e-122	5.8425e-120
KIF1A	-1.39096	6.44744	495.489	9.61085e-70	1.11649e-68
KIF3A	1.01488	5.98496	1079.14	1.75487e-72	2.21861e-71
KIRREL2	-1.88547	5.98214	868.388	3.81332e-98	1.09849e-96
KLHDC8A	-1.08749	6.17349	2464.46	1.53646e-86	2.9795e-85
KLHL1	-3.47342	5.96334	1236.39	1.03112e-118	7.79518e-117
KLHL14	-1.27083	6.09342	1058.12	1.39927e-106	5.82106e-105
KLK12	-1.726	5.67593	303.068	9.84409e-50	6.7937e-49
KLK13	-2.06772	6.17981	1050.82	5.15918e-109	2.3862e-107
KLK14	-1.58262	6.03525	773.336	8.00116e-92	1.81372e-90
KLK2	-2.20433	6.1018	1305.39	4.92037e-122	4.23578e-120
KLK3	-2.32139	5.87507	609.915	1.33885e-79	2.09228e-78
KLK6	-1.15418	6.3445	399.526	2.11836e-60	1.91669e-59
KLK7	-1.13513	6.27751	380.452	2.10706e-58	1.81076e-57
KLK8	-1.61577	6.21548	601.646	6.29431e-79	9.61448e-78
KLRB1	-1.16219	6.41528	2010.77	3.37647e-118	2.45296e-116
KLRD1	-1.14951	6.34121	2173.17	2.70513e-109	1.26293e-107
KNDC1	-1.22612	6.10783	398.407	2.76568e-60	2.48878e-59
KPNA2	2.02636	6.00794	523.799	2.67053e-72	3.35913e-71
KPNA4	1.08491	6.1934	285.079	1.43478e-47	9.48857e-47
KRBA2	1.0906	5.58024	164.774	2.45552e-31	1.09754e-30
KRT1	1.40489	4.62295	71.6169	6.59143e-16	1.82567e-15
KRT13	-1.38993	5.72588	178.072	2.63536e-33	1.23656e-32
KRT14	1.85465	5.73782	332.675	3.65755e-53	2.74833e-52
KRT20	-3.40663	5.87804	1398.19	2.72741e-126	2.86052e-124
KRT6A	-1.13255	6.13192	238.626	1.07548e-41	6.11105e-41
KRT75	-2.0798	6.0805	772.653	8.92125e-92	2.01615e-90
KRT83	-1.9385	5.91332	791.047	4.77893e-93	1.12793e-91
KRT86	2.72588	5.15062	411.806	1.1564e-61	1.08316e-60
KRTCAP2	1.22168	6.17396	538.893	1.25008e-73	1.64319e-72
LACRT	-1.65799	5.07254	132.935	2.09779e-26	8.14879e-26
LALBA	-3.4874	5.8341	1015.27	5.1971e-107	2.19265e-105
LAMC1	1.29064	6.23658	417.501	3.08308e-62	2.92647e-61
LBP	-1.28696	6.49319	617.095	3.52947e-80	5.65817e-79
LCT	-2.32599	6.22161	1186.02	3.38607e-116	2.20213e-114
LDHA	1.60556	6.293	1344.87	7.12572e-124	6.75945e-122
LEFTY2	-1.34752	6.00189	526.837	1.43595e-72	1.8216e-71
LGALS2	-1.1018	6.16785	765.83	3.61811e-88	7.38144e-87
LGALS7	-1.87521	6.15496	1111.34	2.60335e-112	1.37737e-110
LHFPL4	-1.86573	5.6031	557.371	3.12401e-75	4.29206e-74
LILRA4	-1.14569	6.24036	1513	3.35154e-100	1.04643e-98
LILRB3	1.15509	5.53618	217.661	6.81666e-39	3.61798e-38
LIN28A	-3.05506	5.8033	1168.52	2.59115e-115	1.61464e-113
LIN7A	-1.14427	6.36752	1081.88	1.03328e-110	5.12956e-109
LMCD1	1.12091	6.07105	884.491	7.8125e-94	1.91368e-92
LMOD2	-1.98019	5.20818	289.978	3.63219e-48	2.4312e-47
LMTK3	2.36956	5.5148	493.972	1.31247e-69	1.51995e-68
LOC145783	1.09021	5.49078	99.3489	7.77944e-21	2.53299e-20
LOC152225	-1.46775	5.76922	452.293	1.11588e-65	1.15009e-64
LOC153328	-1.20408	5.88826	412.977	8.79092e-62	8.23934e-61
LOC283174	-1.05427	6.46041	1206.39	5.59714e-103	1.9207e-101
LOC285593	-1.45012	6.19842	1885.3	1.68577e-145	5.02122e-143
LOC286467	-1.19092	6.03606	829.047	9.27144e-91	2.00697e-89
LOC338799	2.02296	5.6374	713.043	1.5427e-87	3.0881e-86
LOC400696	-1.00948	5.86237	427.269	1.39253e-58	1.20087e-57
LOC441869	4.14675	5.27734	1423.72	1.96301e-127	2.23169e-125
LOC643719	-1.14818	5.85891	980.418	2.33846e-73	3.03898e-72
LOC647979	1.2157	6.36258	11347.8	2.05755e-138	3.97962e-136
LOC728264	2.48942	5.46146	528.258	1.06432e-72	1.35594e-71
LOC728643	-1.01989	6.53281	9679.61	1.08321e-102	3.64984e-101
LPAR1	1.55571	5.78376	367.203	5.51904e-57	4.55374e-56
LPAR3	-1.37348	6.12874	612.205	8.7422e-80	1.38214e-78
LRCH4	1.10435	6.07496	914.413	1.51961e-91	3.39814e-90
LRP1B	-1.29248	6.19061	498.211	5.41264e-70	6.3373e-69
LRP5	1.83605	5.96659	726.451	1.65809e-88	3.4202e-87
LRRC10B	1.1216	5.42576	117.868	5.89152e-24	2.11428e-23
LRRC15	1.09182	6.16896	666.41	4.81153e-84	8.73879e-83
LRRC47	1.11131	6.11293	1848.75	1.42166e-95	3.74077e-94
LRRIQ1	-1.18657	5.96616	450.855	1.53719e-65	1.57776e-64
LRTM2	-1.03528	5.73381	195.885	7.18744e-36	3.57643e-35
LSAMP	-1.301	6.29374	1408.41	9.56846e-127	1.03263e-124
LSM12	2.65076	5.78795	1080.46	1.17907e-110	5.81453e-109
LST-3TM12	-3.47588	5.66604	1163.52	4.68413e-115	2.89463e-113
LTA	-1.24891	6.22572	595.255	2.10094e-78	3.16374e-77
LTA4H	1.17714	6.14976	1888.26	1.03412e-109	4.93626e-108
LTBP3	1.05293	6.22932	946.78	6.16782e-95	1.5729e-93
LUM	1.19887	6.3715	1140.79	7.24744e-114	4.1197e-112
LY6D	-1.08502	5.77743	184.91	2.66594e-34	1.27665e-33
LY6H	-1.66237	6.31457	2184.09	2.72112e-155	1.39744e-152
LY9	-1.05715	6.39459	1341.09	3.04852e-98	8.85022e-97
MACC1	1.31312	5.88868	303.211	9.51555e-50	6.57611e-49
MAEL	-1.79596	5.82097	735.156	3.86256e-89	8.10212e-88
MAF	2.81901	5.68097	709.972	2.62655e-87	5.20867e-86
MAF1	1.05799	6.22474	519.298	6.72164e-72	8.35604e-71
MAFB	2.61704	5.80461	895.984	6.87762e-100	2.12507e-98
MAGEA1	-1.03231	5.25563	63.0724	2.54465e-14	6.63588e-14
MAGEA12	-3.08934	6.05093	1147.46	3.25372e-114	1.89288e-112
MAGEA2	-3.25988	5.91482	995.108	7.49897e-106	2.96239e-104
MAGEA3	-2.66526	5.96211	646.176	1.75903e-82	3.06042e-81
MAGEA4	-3.03637	5.88233	995.817	6.82258e-106	2.70957e-104
MAGEA6	-2.42077	5.90092	507.027	8.52845e-71	1.01938e-69
MAGEA9B	-2.8407	5.76032	893.456	9.72655e-100	2.98675e-98
MAGEC1	-2.57764	5.90494	969.934	2.2227e-104	8.07381e-103
MAGEC2	-2.88623	5.99881	895.124	7.78432e-100	2.40025e-98
MAL	-1.18621	6.12032	598.696	1.09674e-78	1.66502e-77
MAP1B	1.13582	6.08751	508.662	6.06766e-71	7.31706e-70
MAP4	1.03908	6.3534	1448.8	2.75068e-102	9.20583e-101
MAPK4	-1.46176	6.23506	639.015	6.39768e-82	1.08644e-80
MARCO	-1.05244	6.26713	513.482	2.23091e-71	2.72335e-70
MARK2	1.18393	6.15344	2013.67	3.13181e-111	1.60835e-109
MAST1	-1.21717	6.20524	1220.34	2.47639e-108	1.09765e-106
MAT1A	-1.18197	6.16379	769.902	1.38461e-91	3.10558e-90
MAVS	1.20593	6.1833	781.274	2.26602e-92	5.24036e-91
MAZ	1.05859	6.334	1722.27	2.54406e-104	9.1963e-103
MBD2	1.2524	6.12165	576.96	6.92711e-77	9.96767e-76
MBTPS1	1.22273	6.22586	1671.24	2.60388e-125	2.60265e-123
MCCD1	-1.82442	5.56582	340.327	4.98366e-54	3.83178e-53
METAP2	1.81708	5.98543	957.694	1.18197e-103	4.16148e-102
METRNL	1.05216	5.98324	631.59	1.8429e-77	2.69081e-76
MGAM	-1.45772	6.32756	1361.85	1.18935e-124	1.16533e-122
MGC2752	1.32636	5.94912	512.794	2.57255e-71	3.12759e-70
MIB1	1.36599	6.09029	858.576	1.62486e-97	4.56585e-96
MID1IP1	1.15472	6.01154	1061.04	2.04823e-94	5.11818e-93
MIER3	1.65317	5.87182	357.652	6.03049e-56	4.87844e-55
MINK1	1.26691	6.11216	338.583	7.86839e-54	6.00327e-53
MKL1	1.08723	6.09477	1446.91	2.30887e-90	4.93343e-89
MLC1	-1.53469	6.11547	1036.14	3.41603e-108	1.50073e-106
MMEL1	-1.03816	6.14243	747.641	1.11059e-77	1.63763e-76
MNX1	-1.11332	5.98841	323.374	4.21984e-52	3.06866e-51
MOCS3	1.85128	5.7141	671.879	1.8173e-84	3.33724e-83
MOGAT2	-1.19373	6.11738	635.15	1.28922e-81	2.16464e-80
MORN3	-1.06178	6.25828	2128.99	8.23693e-89	1.70616e-87
MOSPD3	3.50273	5.54973	1062.75	1.10272e-109	5.24688e-108
MPP7	1.00789	6.00738	162.362	5.67253e-31	2.51432e-30
MS4A8B	-1.71706	6.05472	540.906	8.34322e-74	1.10253e-72
MSLN	-1.06704	6.01738	290.148	3.48121e-48	2.33119e-47
MT1A	-1.40188	6.06328	769.699	1.43028e-91	3.20319e-90
MT1M	-1.10977	6.26346	1947.04	1.74597e-96	4.76239e-95
MTA1	1.50747	5.99386	896.495	6.27861e-100	1.94402e-98
MTA2	1.86577	6.00895	1111.33	2.60806e-112	1.37737e-110
MTERFD2	1.36472	5.85984	486.323	6.67837e-69	7.54064e-68
MTHFR	1.88251	5.83274	454.504	6.88269e-66	7.16811e-65
MTIF2	1.38191	5.98534	910.05	9.02632e-101	2.89095e-99
MTSS1L	1.36033	6.01412	1011.42	8.46199e-107	3.56001e-105
MUC13	-2.0454	6.096	922.741	1.52333e-101	4.9752e-100
MUC2	-1.83675	5.91369	434.446	6.24999e-64	6.14802e-63
MUC21	-1.56815	5.17302	178.811	2.05023e-33	9.63829e-33
MUC4	-1.55653	6.22171	1173.17	1.5297e-115	9.65334e-114
MUM1	2.25803	5.79236	1040.27	1.96364e-108	8.72971e-107
MYBPC2	-2.44526	6.05811	1588.05	2.4398e-134	3.86552e-132
MYCN	-1.32613	6.49554	2148.75	3.40955e-154	1.69261e-151
MYF6	-3.95869	6.01118	2348.01	3.41831e-160	2.31404e-157
MYH1	-2.76397	5.9535	1731.13	6.47123e-140	1.39675e-137
MYH2	-3.16457	5.91236	1760.5	5.19899e-141	1.20982e-138
MYH3	-1.19033	6.26801	2758.02	1.32848e-109	6.30096e-108
MYH7	-3.56349	6.08934	1851.37	2.73041e-144	7.82e-142
MYH9	1.00711	6.54336	2745.94	5.39917e-112	2.81153e-110
MYL1	-4.80139	5.88823	2664.23	7.03792e-169	8.73465e-166
MYL2	-3.63851	5.93763	2103.4	8.89923e-153	4.01625e-150
MYL6	1.60968	6.30381	906.189	1.59318e-100	5.0591e-99
MYO16	-1.42997	6.20155	1453.23	1.0386e-128	1.2474e-126
MYO18B	-1.31705	5.95994	657.738	2.20176e-83	3.91766e-82
MYO1F	2.43339	5.64625	534.687	2.89503e-73	3.74918e-72
MYPN	-2.20966	5.70268	595.02	2.1712e-78	3.26294e-77
MYT1	-1.13263	6.05935	231.242	1.01741e-40	5.65592e-40
N6AMT1	1.4993	5.78902	401.919	1.19075e-60	1.08399e-59
NAA15	1.34858	6.05392	555.051	4.99152e-75	6.82006e-74
NAAA	1.72706	5.8416	855.695	2.4507e-97	6.8221e-96
NAP1L3	-1.08018	6.54163	4466.21	1.26126e-114	7.57416e-113
NARS	1.1121	6.26278	547.926	2.05085e-74	2.75662e-73
NAT2	-1.85605	6.33576	1355.28	2.37338e-124	2.31024e-122
NAV1	1.36701	6.05409	1057.64	2.11483e-109	9.96712e-108
NBPF10	3.95355	5.62509	1202.99	4.60308e-117	3.13031e-115
NBPF15	1.366	5.78846	569.255	3.04851e-76	4.29531e-75
NCAN	-2.07895	5.60277	310.337	1.36895e-50	9.65333e-50
NCRNA00052	-1.27404	5.55104	129.209	8.31604e-26	3.17078e-25
NCRNA00086	-1.09933	6.37348	2110.23	1.33838e-103	4.70107e-102
NCRNA00181	3.56818	5.38142	1005.72	1.79534e-106	7.36585e-105
NCRNA00188	1.98252	6.09538	1629.75	5.3066e-136	9.08405e-134
NDRG3	1.49094	6.01671	845.628	1.12022e-96	3.08953e-95
NDST1	1.08164	6.27051	870.765	2.68888e-98	7.8675e-97
NDUFV1	2.67687	5.84981	715.891	9.69015e-88	1.95021e-86
NELL1	-2.60292	5.91809	746.524	6.06045e-90	1.2894e-88
NENF	2.3876	5.86504	886.304	2.78447e-99	8.44584e-98
NEURL4	1.2839	5.91625	407.697	3.05924e-61	2.83517e-60
NFE2	-1.1129	6.03922	729.976	9.22273e-81	1.50608e-79
NFX1	2.34554	5.84358	609.823	1.36205e-79	2.12632e-78
NFYB	1.18172	6.01868	1149.33	3.6584e-99	1.10516e-97
NIPAL1	-1.01339	6.05664	688.249	2.34744e-69	2.6934e-68
NKX2-2	-1.81526	5.81681	331.243	5.31783e-53	3.97383e-52
NKX2-5	-1.63902	5.66759	276.761	1.49579e-46	9.66876e-46
NKX3-2	-1.01384	6.06807	669.034	4.58454e-70	5.38467e-69
NLE1	2.04402	5.68897	446.108	4.48151e-65	4.5311e-64
NLRP5	-2.00485	5.75102	481.773	1.7699e-68	1.97003e-67
NLRP7	-1.32485	6.05494	753.129	2.03647e-90	4.35764e-89
NME1-NME2	1.13624	5.73224	233.61	4.91659e-41	2.75067e-40
NMU	-1.49294	5.99057	421.233	1.29707e-62	1.23988e-61
NNAT	-1.15209	6.20918	1435.08	1.13096e-98	3.36869e-97
NONO	1.47781	6.26518	2134.86	9.30294e-154	4.32965e-151
NOTCH3	1.11819	6.27788	1032.86	5.22473e-108	2.2752e-106
NOTCH4	1.02446	5.98071	490.389	2.80724e-69	3.21108e-68
NPAS1	-1.16869	6.22733	1591.23	1.08321e-102	3.64984e-101
NPC1L1	-1.30512	6.25526	1172.03	1.74988e-115	1.09962e-113
NPHP3	1.5008	5.78585	704.216	6.86755e-87	1.344e-85
NPM1	1.25349	6.35664	10333.1	7.75725e-146	2.35773e-143
NPR3	-1.01042	6.2838	1016.51	6.04604e-83	1.06059e-81
NPY	-3.34259	5.58944	1229.67	2.15791e-118	1.57538e-116
NPY2R	-1.61865	5.42286	190.637	4.00914e-35	1.95829e-34
NR2F2	1.66516	6.00305	690.792	6.9075e-86	1.31889e-84
NR3C1	1.13421	6.09602	804.478	5.86711e-94	1.4419e-92
NRAP	-2.30248	5.69441	744.276	8.62504e-90	1.82721e-88
NRAS	2.18561	5.88375	518.472	7.96528e-72	9.86092e-71
NRG1	-1.23159	6.33209	1222.71	4.8836e-118	3.4967e-116
NRK	2.18413	5.34502	247.19	8.18533e-43	4.80884e-42
NRL	-1.03602	6.34437	8964.69	4.74653e-91	1.04263e-89
NRTN	-1.01265	6.02867	531.458	1.09291e-67	1.19156e-66
NRXN1	-1.59728	6.25203	1265.3	4.02354e-120	3.15382e-118
NSMCE1	1.0734	6.13065	1412.45	7.52116e-91	1.64001e-89
NTNG1	-1.68783	6.30682	1010.74	9.43284e-107	3.95728e-105
NTRK3	-1.11041	6.36756	954.766	1.76687e-103	6.19152e-102
NUDT16P1	1.39716	5.50307	246.341	1.05459e-42	6.17556e-42
NUF2	1.5577	5.76092	401.584	1.28923e-60	1.17142e-59
NUP43	1.3322	6.00026	1035.85	3.47448e-108	1.52193e-106
NXPH1	-1.1477	5.82983	163.777	3.47401e-31	1.54535e-30
OBP2B	-1.48945	6.29837	461.765	1.3833e-66	1.47048e-65
ODF2	1.20703	6.10769	2065.03	4.66092e-111	2.35306e-109
OGDH	1.69332	6.06977	434.589	6.04975e-64	5.95893e-63
OGDHL	-1.69643	5.96788	808.217	3.28685e-94	8.10449e-93
OLFM4	-1.16498	6.40907	452.622	1.04584e-65	1.08015e-64
ONECUT2	3.16375	4.97648	365.822	7.73319e-57	6.36652e-56
OPA1	1.07215	6.18711	981.661	6.32615e-95	1.60777e-93
OPRK1	-2.40832	6.08746	990.651	1.36007e-105	5.31642e-104
ORC2L	1.0147	6.00104	952.973	1.9614e-73	2.56238e-72
OSBPL9	1.03371	6.17567	1996.23	8.65438e-88	1.74884e-86
OTX1	-1.25759	6.33397	1147.64	3.1843e-114	1.85976e-112
OVOL2	1.71427	5.72146	276.509	1.6142e-46	1.04161e-45
OXGR1	-1.34803	5.99878	520.585	5.15973e-72	6.44663e-71
P2RX2	-2.14539	6.0482	788.161	7.63769e-93	1.79697e-91
P2RX7	-1.00234	6.51666	2733.99	2.79147e-98	8.15165e-97
P2RY11	1.04321	5.64923	125.388	3.45415e-25	1.28768e-24
P2RY12	-1.07572	6.10322	1221.57	3.75033e-80	5.98646e-79
P2RY2	1.11406	5.77114	185.75	2.0219e-34	9.72303e-34
PABPN1	1.06841	6.22792	424.324	6.35124e-63	6.10645e-62
PADI3	-1.46356	5.90066	459.698	2.1775e-66	2.30486e-65
PAFAH1B3	1.33272	6.05109	383.755	9.42117e-59	8.16702e-58
PAH	-1.39958	6.02242	503.492	1.78506e-70	2.10824e-69
PAR5	-1.28529	6.21598	1290.29	3.70594e-120	2.92024e-118
PARP1	1.38783	6.24869	3451.02	2.72358e-161	2.13485e-158
PARP14	1.17265	6.19114	1806.58	1.11975e-112	6.04219e-111
PART1	-1.38363	6.38351	651.013	7.39255e-83	1.29222e-81
PAX1	-1.80244	6.11884	964.352	4.75354e-104	1.69771e-102
PAX2	-1.07149	6.00517	309.457	1.74525e-50	1.22836e-49
PAX7	-1.70038	5.9197	257.539	3.85543e-44	2.34363e-43
PCBP2	2.21832	6.12969	1342.85	8.83448e-124	8.32734e-122
PCDH1	2.58301	5.86339	839.21	2.93968e-96	7.91693e-95
PCDH10	-1.52195	6.17834	788.354	7.40915e-93	1.74596e-91
PCDH9	-1.00105	6.03049	859.49	2.08622e-66	2.21139e-65
PCDHA1	-1.14974	6.24043	575.645	8.9299e-77	1.27755e-75
PCMT1	1.38094	6.08876	1534.28	3.73163e-132	5.14585e-130
PCNXL3	1.98103	5.94449	1913.7	1.73763e-146	5.62575e-144
PCP4	-1.65681	6.00567	574.234	1.1732e-76	1.67201e-75
PCSK1N	-1.20074	6.19085	552.615	8.08098e-75	1.09708e-73
PCSK2	-2.60447	5.95582	926.626	8.81949e-102	2.91886e-100
PCSK9	-1.03338	5.98801	516.199	7.40615e-68	8.11625e-67
PCYOX1	1.76511	6.05611	610.181	1.27422e-79	1.99548e-78
PDCL	1.40679	5.90286	363.546	1.37351e-56	1.12952e-55
PDHX	1.16401	6.04118	991.781	3.11617e-98	9.01147e-97
PDLIM7	1.30169	6.02745	1129.05	2.93322e-113	1.64227e-111
PDPK1	1.07576	6.15798	1862.46	2.74227e-93	6.58719e-92
PDZK1P1	-1.00798	6.09598	840.789	6.00793e-71	7.2509e-70
PDZRN4	-1.41456	6.26397	1345.63	6.57691e-124	6.27884e-122
PEBP4	-1.56451	6.00659	595.678	1.93951e-78	2.9236e-77
PEX2	1.51878	5.99516	982.107	4.20135e-105	1.6004e-103
PEX5L	-1.69651	6.1548	1390.06	6.30096e-126	6.51669e-124
PFN2	1.1654	6.15801	960.145	8.44763e-104	3.00264e-102
PGC	-1.84043	5.98482	558.634	2.46255e-75	3.39267e-74
PGLYRP2	-1.01801	6.26382	322.798	4.91514e-52	3.56731e-51
PGM1	1.52517	6.01619	432.172	1.04954e-63	1.02902e-62
PGRMC1	1.69036	6.10402	542.872	5.62549e-74	7.46706e-73
PHEX	-1.02889	6.20102	1026.53	3.63796e-80	5.81956e-79
PHF21B	-1.71496	6.0363	709.824	2.69283e-87	5.33302e-86
PHGDH	1.05098	6.1016	588.084	8.20303e-78	1.2156e-76
PI3	-1.35514	6.05243	347.509	7.91607e-55	6.23118e-54
PI4KA	1.08903	6.19331	2040.13	2.97525e-98	8.65438e-97
PICALM	1.3697	6.18668	2132.38	1.08846e-149	4.26591e-147
PIK3C2B	1.13746	6.05765	1183.37	2.21833e-95	5.78591e-94
PIK3C2G	-1.069	6.24514	538.924	1.24235e-73	1.63447e-72
PIK3R2	1.31479	6.14368	2473.19	4.91688e-134	7.62782e-132
PIP4K2C	1.17584	6.13827	1514.99	1.85239e-108	8.25976e-107
PIP5K1A	1.03282	6.19564	325.867	2.18346e-52	1.60031e-51
PLA2G10	-1.07973	5.95943	400.359	1.725e-60	1.56173e-59
PLA2G2A	-1.09732	6.47915	596.925	1.53214e-78	2.31422e-77
PLA2G3	-1.5771	5.79533	390.373	1.88464e-59	1.65788e-58
PLAC1	-1.3968	6.31742	1863.36	1.02756e-144	3.00069e-142
PLAC2	1.02894	5.80696	145.703	2.02698e-28	8.27743e-28
PLAC8	-1.07189	6.27388	1308.22	1.83643e-91	4.08817e-90
PLAU	1.29602	6.09654	868.213	3.9129e-98	1.125e-96
PLEKHA7	1.0616	5.96457	600.602	1.49135e-77	2.18394e-76
PLOD3	1.38041	6.06939	655.059	3.5916e-83	6.33173e-82
PLXNA1	1.20624	6.10801	397.937	3.09377e-60	2.7773e-59
PM20D2	1.0447	5.82169	405.416	5.20196e-61	4.80005e-60
PNCK	-1.17378	6.13608	655.802	3.14655e-83	5.5655e-82
PNLDC1	-1.25949	5.48952	247.747	6.93346e-43	4.08627e-42
PNLIPRP3	-2.29964	5.23017	286.222	1.03672e-47	6.86826e-47
PNMA3	-1.43552	6.20375	1101.43	8.83588e-112	4.58511e-110
PNMA5	-2.14729	5.526	671.01	2.1163e-84	3.88153e-83
PNMT	-1.34567	6.24129	623.332	1.11747e-80	1.82084e-79
POLDIP2	1.00491	6.25449	528.112	1.10752e-72	1.40976e-71
POLR2C	1.29119	6.07626	2312.36	1.30143e-122	1.14687e-120
POLR3H	4.92133	5.63673	3097.09	2.21704e-179	4.12729e-176
PPARGC1A	-1.08031	6.25914	1191.31	1.17711e-91	2.65214e-90
PPOX	1.05815	5.9457	1233.63	7.19672e-76	1.00545e-74
PPP1R9B	1.20221	6.13934	1884.16	3.86713e-113	2.15705e-111
PPP4R4	-1.27904	6.14918	564.851	7.27481e-76	1.01541e-74
PRDM16	-1.07576	6.1677	1998.37	1.72942e-84	3.17979e-83
PRDM8	-1.02608	6.24128	3221.56	2.09347e-82	3.62535e-81
PRDX1	2.62511	6.06024	899.177	4.34669e-100	1.35147e-98
PRELID1	1.62295	6.04837	696.921	2.41438e-86	4.65768e-85
PRIMA1	1.03899	5.555	155.978	5.26524e-30	2.26437e-29
PRKRIR	1.02683	6.14158	235.475	2.79551e-41	1.57167e-40
PRLR	1.18724	6.25326	361.957	2.04446e-56	1.67482e-55
PROL1	-1.96079	5.90952	497.624	6.12474e-70	7.15979e-69
PRPF38B	1.62105	5.96722	687.312	1.2581e-85	2.38081e-84
PRSS21	-1.28854	6.15189	574.851	1.04115e-76	1.48809e-75
PRSS33	-2.55236	5.76236	528.81	9.60893e-73	1.22732e-71
PSCA	-1.00625	6.39584	633.049	1.88912e-81	3.1541e-80
PSD	-1.0532	6.42962	3435.79	2.51307e-100	7.91271e-99
PSMD11	1.01428	6.16369	1015.62	7.07163e-84	1.27503e-82
PSMD5	1.25659	6.08027	1733.45	5.4042e-117	3.6584e-115
PSTPIP1	1.56354	5.49788	334.247	2.41334e-53	1.82076e-52
PTBP1	1.31235	6.26718	2528.93	9.7543e-148	3.45883e-145
PTCH2	-1.15498	6.369	3440.35	1.10423e-112	6.00193e-111
PTCHD1	-1.10937	5.98745	369.95	2.79022e-57	2.32149e-56
PTGFR	-1.12046	6.41152	1276.08	1.88876e-110	9.22275e-109
PTH1R	-1.02711	6.20991	1287.13	1.71144e-80	2.77955e-79
PTPN13	1.20511	6.0002	587.669	8.77879e-78	1.29834e-76
PTPRC	1.2566	6.00408	322.873	4.8182e-52	3.50036e-51
PTPRZ1	-1.13845	6.04904	387.869	3.47364e-59	3.03597e-58
PTTG1IP	1.5363	6.23735	1342.13	9.53201e-124	8.92831e-122
PVALB	-1.34198	6.28845	476.634	5.4047e-68	5.94477e-67
PYCRL	1.04168	6.03796	912.02	1.48869e-79	2.31914e-78
PYDC1	-1.19043	5.94985	264.872	4.55147e-45	2.84572e-44
PYGM	-1.1031	6.06091	1619.99	6.0408e-81	9.91903e-80
PYHIN1	-1.0158	6.26421	1218.62	1.95055e-82	3.38179e-81
PYY	-2.28756	6.16052	965.674	3.96916e-104	1.42098e-102
RAB11A	2.47654	5.98359	783.925	1.48982e-92	3.46686e-91
RAB19	-1.02848	6.12784	902.625	1.73213e-75	2.39745e-74
RAB21	1.04253	6.11049	904.793	1.39313e-84	2.57099e-83
RAG1	-1.09829	6.29386	2264.78	4.67254e-97	1.29829e-95
RANBP3	1.80161	5.94946	1118.12	1.11033e-112	6.01317e-111
RAPGEF1	1.44574	6.07125	329.482	8.43638e-53	6.26336e-52
RASAL2	1.01435	6.08596	324.949	2.78221e-52	2.03514e-51
RASSF1	1.33232	5.95398	299.098	2.93252e-49	2.00431e-48
RASSF7	1.39457	5.91756	431.848	1.12997e-63	1.10642e-62
RBBP6	1.20226	6.134	2050.45	1.18185e-112	6.35425e-111
RBM47	1.39232	6.14224	686.944	1.34062e-85	2.53374e-84
RBM8A	1.0546	6.24115	2439.23	3.90101e-96	1.04492e-94
RDBP	1.8952	5.93859	456.284	4.63842e-66	4.86136e-65
RELN	-1.29191	6.28165	1082	9.92759e-111	4.94487e-109
REM1	-1.08991	6.27562	3219.83	2.36179e-94	5.87214e-93
RERE	1.15024	6.21517	751.952	2.50271e-90	5.33995e-89
RERGL	-1.38224	6.04491	618.898	2.5295e-80	4.07704e-79
RFX5	1.0815	6.14718	916.096	2.1273e-93	5.13483e-92
RGN	-1.16589	6.25459	1112.3	1.55503e-104	5.70421e-103
RGS9	-1.01516	6.15332	863.525	2.70796e-75	3.72388e-74
RHBDD3	1.32634	5.86686	297.248	4.87734e-49	3.3153e-48
RHCE	-1.08803	6.18334	1716.4	2.59516e-87	5.15329e-86
RIC8A	1.35811	6.12478	833.892	6.56414e-96	1.7395e-94
RIOK3	1.26054	6.08108	1069.31	4.80342e-110	2.32264e-108
RIPK4	1.40224	5.77139	604.101	3.92321e-79	6.01734e-78
RNASEL	1.46158	5.84277	794.674	2.7049e-93	6.51846e-92
RNF11	1.41688	6.11797	839.327	2.88844e-96	7.79303e-95
RNF13	1.05793	6.15205	745.814	6.80634e-90	1.44603e-88
RNF185	1.12951	6.09887	2313.11	2.13237e-97	5.9482e-96
RNF38	1.24789	6.04707	1042.71	1.43272e-108	6.44635e-107
RNF4	1.45872	6.05974	615.088	5.1184e-80	8.15276e-79
RNF44	1.50378	6.00489	585.373	1.37647e-77	2.01969e-76
ROBO2	-1.52574	6.54394	1044.79	1.11861e-108	5.06368e-107
ROM1	-1.08504	6.55455	7364.07	1.00726e-116	6.75725e-115
ROMO1	1.07371	6.06158	1047.95	7.02798e-86	1.34018e-84
ROPN1	-1.25719	5.94505	299.198	2.85362e-49	1.95129e-48
ROPN1B	-1.04668	5.91681	259.375	2.25281e-44	1.3807e-43
RP1	-1.91749	6.47084	1723.93	1.24445e-139	2.57412e-137
RPL32P3	2.42354	5.49082	632.895	1.91905e-81	3.2005e-80
RPL41	4.20908	5.98431	1938.37	2.55389e-147	8.64434e-145
RPL7L1	1.02545	6.12844	2708.08	3.34188e-83	5.90399e-82
RPP40	2.0808	5.55416	370.082	2.68285e-57	2.23591e-56
RPS16	1.40455	6.32094	2084.83	3.61777e-152	1.53941e-149
RPS4Y1	-4.33193	6.19192	2196.44	1.13454e-155	6.25806e-153
RRAD	-1.02155	6.21085	1380.13	8.93465e-80	1.41107e-78
RREB1	1.1933	6.08465	1177.37	1.1466e-106	4.78327e-105
RRM1	1.40229	6.1074	2445.64	2.13481e-146	6.6237e-144
RRP12	1.14311	6.08377	707.974	3.64981e-87	7.20911e-86
RRP9	1.12735	5.94128	1231.37	4.10343e-85	7.6486e-84
RSPH4A	-1.09781	6.10524	1630	3.09194e-83	5.47542e-82
RTBDN	-1.79538	5.94438	792.889	3.57805e-93	8.53972e-92
RTN4RL1	1.06775	5.95431	359.137	4.14174e-56	3.36697e-55
RUFY4	-1.13263	6.06881	780.304	2.26307e-85	4.24482e-84
RUNDC3A	-1.50849	6.30554	1913.11	1.88202e-146	5.96362e-144
RWDD2B	2.24186	5.70443	874.809	1.46091e-98	4.32551e-97
RYR3	-1.03744	6.0278	382.85	1.17399e-58	1.01476e-57
S100A6	1.1408	6.31853	2241.85	1.27146e-118	9.49367e-117
S100A7	-1.01151	6.05516	124.598	4.64938e-25	1.72806e-24
S100A7A	-1.45788	5.70785	209.243	9.76626e-38	5.05206e-37
S100G	-3.54695	6.15095	1509.4	4.18758e-131	5.56837e-129
SALL1	-1.32933	6.44099	1702.87	7.80368e-139	1.57054e-136
SALL2	2.78794	5.60423	623.723	1.02727e-80	1.67569e-79
SALL4	-1.15477	6.37318	2402.48	5.04549e-113	2.7934e-111
SAPS2	1.31674	6.04003	1447.63	2.39391e-123	2.18727e-121
SAR1A	1.14174	6.23387	3333.14	5.73833e-111	2.8872e-109
SBF1	1.02396	6.13752	1392.24	1.36186e-83	2.44364e-82
SBSN	-1.03174	5.61299	146.325	1.61889e-28	6.63644e-28
SC5DL	1.29827	6.02083	521.375	4.38755e-72	5.4957e-71
SCD	1.05855	6.40529	673.815	1.31209e-84	2.42444e-83
SCEL	-2.43819	5.96173	841.868	1.97004e-96	5.35397e-95
SCG3	-2.22965	5.99037	1246.64	3.24144e-119	2.463e-117
SCGB2A1	-1.23523	6.53832	618.327	2.81051e-80	4.52507e-79
SCGN	-1.94648	6.08799	638.176	7.44653e-82	1.26024e-80
SCN3B	-1.01692	6.0914	755.006	8.30567e-72	1.02738e-70
SCNN1A	1.29038	6.11063	651.034	7.36467e-83	1.28886e-81
SCP2	1.53752	6.13042	1234.51	1.27492e-118	9.49367e-117
SCRG1	-1.67683	6.21218	872.26	2.15895e-98	6.36698e-97
SCUBE1	-1.01388	6.42294	842.784	3.28587e-93	7.85496e-92
SEMA3D	1.21371	5.48118	166.626	1.29622e-31	5.81289e-31
SEMA5A	1.08551	6.01462	319.247	1.26238e-51	9.06932e-51
SENP6	1.29473	6.10565	1002.38	2.80624e-106	1.14189e-104
SEPHS2	1.1313	6.23839	583.79	1.86383e-77	2.71871e-76
SERF1A	1.29087	5.92497	611.316	1.01924e-79	1.60122e-78
SERP1	1.15039	6.3055	1394.86	3.02241e-119	2.30835e-117
SERPINB2	-1.87855	6.28803	980.175	5.55562e-105	2.1e-103
SERPINB3	-2.39028	5.43378	465.686	5.79813e-67	6.20788e-66
SERPINB7	-1.12427	5.84253	335.849	1.59014e-53	1.20519e-52
SEZ6	-2.56347	5.76981	1108.51	3.61219e-112	1.90093e-110
SEZ6L	-1.64425	6.23126	808.321	3.28597e-94	8.10449e-93
SFPQ	1.50927	6.20203	1925.51	7.04423e-147	2.33133e-144
SFRP4	1.84784	5.95544	1042.19	1.53295e-108	6.87659e-107
SFRS2IP	1.18961	6.1899	2273.87	1.26624e-115	8.02472e-114
SFTPA2	-1.19334	5.93776	332.989	3.36931e-53	2.5343e-52
SFTPD	-1.09557	6.13617	1470.82	4.64068e-85	8.63921e-84
SGCG	-1.60578	6.01222	948.288	4.23524e-103	1.46347e-101
SGSM3	1.1032	6.11693	488.867	3.91745e-69	4.46044e-68
SH3D19	1.15154	6.07926	643.047	3.08918e-82	5.3249e-81
SH3GL2	-1.05414	5.75197	229.682	1.6359e-40	9.03692e-40
SHISA5	1.33374	6.21609	1156.53	1.09996e-114	6.65924e-113
SHROOM2	1.0628	5.94919	368.456	4.01549e-57	3.32977e-56
SIAH1	1.51146	5.89133	456.504	4.41791e-66	4.63678e-65
SIGLEC15	-1.17978	6.10956	780.456	2.54021e-92	5.86533e-91
SIM1	-1.34044	5.93313	552.962	7.46456e-75	1.01432e-73
SIPA1L2	1.43743	5.9722	1208.48	2.44151e-117	1.6834e-115
SIRPA	1.24284	6.06547	823.804	2.99381e-95	7.76774e-94
SIRT1	1.38242	5.95311	340.286	5.0656e-54	3.89076e-53
SIRT4	-1.09235	6.27259	2442.7	1.69183e-94	4.25615e-93
SIRT7	1.37832	5.86146	551.352	1.02721e-74	1.39075e-73
SKIV2L	1.12527	6.10145	1790.51	6.42775e-97	1.77934e-95
SLC10A7	1.63899	5.69951	301.847	1.38107e-49	9.49595e-49
SLC12A1	-1.49321	5.98407	612.658	8.03556e-80	1.27584e-78
SLC12A2	1.10201	6.18107	983.792	1.80289e-99	5.4909e-98
SLC13A2	-1.10198	6.21813	398.002	3.04619e-60	2.7379e-59
SLC16A10	-1.10938	6.1431	1331.33	1.82425e-87	3.63702e-86
SLC16A7	-1.24882	6.33273	2379.8	1.43144e-125	1.46016e-123
SLC1A3	1.62232	5.74017	637.324	8.58267e-82	1.44759e-80
SLC1A4	1.24625	6.14091	401.607	1.29165e-60	1.17225e-59
SLC22A23	1.29005	5.99086	1106.27	4.75872e-112	2.49548e-110
SLC22A3	-1.19204	6.35788	1563.51	4.35432e-118	3.1328e-116
SLC23A1	-1.26423	6.21852	1152.21	1.84097e-114	1.0967e-112
SLC24A5	-1.19174	6.20914	1543.95	1.00007e-104	3.71423e-103
SLC25A10	1.91038	5.89518	382.519	1.27249e-58	1.09926e-57
SLC25A18	-1.08343	6.1819	1441.74	1.48328e-86	2.88012e-85
SLC25A25	1.29834	5.95263	631.002	2.70958e-81	4.48874e-80
SLC25A26	1.05632	5.91953	372.125	1.61861e-57	1.35808e-56
SLC25A27	2.31658	5.25997	341.859	3.35617e-54	2.5925e-53
SLC25A40	1.22135	5.76687	326.248	1.96362e-52	1.44345e-51
SLC26A1	1.94297	5.36245	229.592	1.68174e-40	9.28324e-40
SLC26A4	-1.21982	6.19082	1701.22	1.77322e-107	7.58867e-106
SLC26A7	-1.39858	6.19806	1297.54	1.15559e-121	9.72325e-120
SLC27A6	-1.25381	6.21178	617.546	3.24695e-80	5.22212e-79
SLC2A12	1.40976	5.57164	329.168	9.10983e-53	6.74988e-52
SLC2A14	-1.32384	6.3469	4078.36	1.53669e-140	3.46756e-138
SLC2A6	1.28829	5.64383	199.363	2.32203e-36	1.16831e-35
SLC30A2	-1.38648	6.19438	875.132	1.41746e-98	4.20524e-97
SLC35A4	1.01172	6.23557	3658.91	1.74827e-88	3.60124e-87
SLC35F3	-1.05393	6.20302	537.812	1.55407e-73	2.0374e-72
SLC38A2	1.12416	6.26576	1229.65	1.34302e-110	6.60118e-109
SLC38A4	-1.28032	6.11623	1046.08	9.28461e-109	4.22861e-107
SLC3A1	-1.61294	6.12371	2760.84	1.44347e-163	1.26457e-160
SLC40A1	1.06735	6.26868	1226.32	1.50765e-100	4.79775e-99
SLC44A5	3.3211	5.20282	556.283	3.87154e-75	5.29953e-74
SLC4A1AP	1.0671	6.04948	693.613	4.81845e-84	8.7407e-83
SLC4A2	1.54045	6.07732	986.375	2.41234e-105	9.30753e-104
SLC4A4	-1.06799	6.23261	1176.81	6.67526e-88	1.35442e-86
SLC6A11	-1.3766	6.08143	406.275	4.27752e-61	3.95684e-60
SLC6A15	-1.69469	5.81119	490.026	3.03229e-69	3.46319e-68
SLC6A16	-1.17556	6.15282	1397.45	1.16626e-97	3.3021e-96
SLC6A8	1.62351	5.94607	586.768	1.05442e-77	1.55634e-76
SLC7A1	1.81249	5.93604	489.033	3.7808e-69	4.31144e-68
SLC7A4	-1.30206	6.03306	362.888	1.61934e-56	1.32948e-55
SLC8A1	1.0402	5.81743	400.852	1.53414e-60	1.39147e-59
SLC8A2	-1.37636	6.03349	807.09	3.91337e-94	9.63336e-93
SLC9A2	-1.03251	6.27656	395.979	4.93918e-60	4.41002e-59
SLC9A5	-1.00307	6.24625	2488.84	1.94931e-79	3.01779e-78
SLCO4C1	-1.0436	5.98944	680.816	3.86616e-69	4.40541e-68
SLIT1	-1.48957	6.27587	1528.23	6.84022e-132	9.17761e-130
SLITRK5	-1.30852	6.18282	742.16	1.23788e-89	2.61129e-88
SLN	-2.32181	6.15794	2537.15	1.71667e-165	1.82617e-162
SMAD3	1.5762	5.97685	634.826	1.36749e-81	2.29348e-80
SMAD4	2.46572	5.84572	576.311	7.85146e-77	1.12651e-75
SMAD5	2.92826	5.78747	712.506	1.71277e-87	3.41934e-86
SMAD6	1.93143	5.47426	221.506	2.0504e-39	1.10023e-38
SMAD7	2.74611	5.7069	631.777	2.38142e-81	3.95831e-80
SMAD9	1.25517	5.2514	75.2258	1.44205e-16	4.08375e-16
SMARCD1	1.22324	6.09425	970.249	2.08946e-104	7.60838e-103
SMEK2	1.88178	6.01271	755.351	1.44155e-90	3.09798e-89
SMYD1	-1.57622	5.90677	455.639	5.35073e-66	5.59609e-65
SNAP25	-1.26818	6.20082	1177.2	9.52617e-116	6.11522e-114
SNORA8	1.58246	5.72151	263.356	7.06493e-45	4.39323e-44
SNTB2	1.03273	6.05805	949.8	1.39247e-79	2.17152e-78
SNX1	1.92479	6.02757	639.066	6.33905e-82	1.07771e-80
SNX19	1.13211	6.16685	949.92	3.44419e-103	1.19846e-101
SNX9	3.15097	5.81316	1038.35	2.56623e-108	1.13409e-106
SOD1	1.01613	6.32589	258.268	3.11395e-44	1.89677e-43
SOSTDC1	-1.13294	6.29038	549.016	1.65092e-74	2.22307e-73
SOX12	1.05564	6.11068	535.099	2.68567e-73	3.48412e-72
SOX2	-1.6136	5.91683	479.62	2.83788e-68	3.14235e-67
SPAG1	2.52422	5.61831	638.444	7.00614e-82	1.18706e-80
SPAG17	-1.30467	6.26445	682.873	2.71138e-85	5.07931e-84
SPAG6	-1.70282	6.1426	663.256	8.39278e-84	1.51141e-82
SPANXA2	-3.52393	5.36102	1193.62	1.36359e-116	9.10673e-115
SPARC	1.22014	6.52763	6205.11	7.60647e-159	4.72013e-156
SPARCL1	1.14529	6.27667	653.294	4.91956e-83	8.63997e-82
SPIB	-1.10754	6.21953	819.231	8.55923e-93	2.01061e-91
SPIN3	1.5127	5.79662	377.929	3.90604e-58	3.33559e-57
SPINK5	-1.60083	6.00049	715.261	1.07724e-87	2.16218e-86
SPINK8	-1.37833	5.94809	358.195	5.25965e-56	4.25949e-55
SPRR1A	-2.68647	5.98123	1009.69	1.08292e-106	4.53033e-105
SPRR3	-1.68287	5.4087	201.465	1.17706e-36	5.96664e-36
SPTY2D1	1.14884	6.0952	2057.88	3.09041e-100	9.68958e-99
SRMS	-1.066	6.31328	761.52	5.31883e-91	1.1649e-89
SSH2	1.01826	6.03172	784.599	7.94951e-76	1.10854e-74
ST13	1.05181	6.3231	2166.42	3.61873e-102	1.20838e-100
ST5	2.6431	5.78785	870.817	2.66854e-98	7.82335e-97
STARD10	1.42919	6.16349	930.994	4.7797e-102	1.59248e-100
STAT6	1.15641	6.21618	1569.77	4.90837e-112	2.56492e-110
STC2	1.16123	6.2457	1535.62	1.20305e-115	7.65686e-114
STEAP2	1.31225	5.92195	259.323	2.28761e-44	1.4003e-43
STIM2	3.10854	5.61338	735.068	3.91883e-89	8.2086e-88
STK38L	1.42333	6.02045	1129.82	2.67239e-113	1.50188e-111
STOX2	-1.14703	6.24033	1601.34	2.09184e-100	6.60037e-99
STRC	-1.15507	6.16198	1320.85	2.15401e-95	5.6379e-94
STS	2.09836	5.7374	943.209	8.55534e-103	2.89579e-101
STT3A	2.19966	6.01296	770.058	1.35057e-91	3.03379e-90
STX10	1.7894	5.74741	561.807	1.30604e-75	1.80938e-74
STX19	-1.50665	6.18855	1404.4	1.44211e-126	1.52322e-124
STXBP5	1.0236	5.9708	553.41	8.57991e-73	1.09777e-71
SUB1	1.62035	6.14869	658.692	1.88291e-83	3.36237e-82
SUCNR1	-1.41754	6.17581	1621.47	1.09541e-135	1.83302e-133
SULT1C2	-1.50114	6.18402	1330.58	3.26404e-123	2.96411e-121
SULT1C3	-2.75845	4.94446	227.095	3.62652e-40	1.98565e-39
SULT4A1	-1.50791	6.26218	870.94	2.62048e-98	7.69761e-97
SUN2	1.3336	6.1791	1814.55	1.20705e-141	2.94699e-139
SUPT6H	1.0936	6.25335	1959.63	5.77705e-104	2.05832e-102
SURF2	3.0638	5.51921	808.401	3.1943e-94	7.90245e-93
SURF4	2.02213	6.1054	1077.95	1.64977e-110	8.08226e-109
SUV39H2	2.52775	5.55849	600.467	7.76556e-79	1.18375e-77
SYCE2	-1.10824	6.199	2809.14	2.29259e-91	5.07334e-90
SYNGR2	1.40951	6.23506	2461.98	1.91056e-163	1.58078e-160
SYNPO2L	-1.51757	6.237	844.841	1.26057e-96	3.46377e-95
SYP	-1.01064	6.46198	2075.31	1.43601e-95	3.77186e-94
SYT4	-3.82105	6.00922	2100.51	1.13956e-152	4.9916e-150
SYT5	-1.91429	6.07842	1045.06	1.07997e-108	4.90364e-107
SYT8	2.14584	5.11975	199.123	2.50967e-36	1.2623e-35
SYTL3	1.43824	5.6806	258.146	3.2149e-44	1.95666e-43
TAPBP	1.00104	6.36196	2492.5	5.80879e-96	1.55036e-94
TAS1R3	-1.118	6.17287	1330.77	7.53412e-91	1.64043e-89
TATDN1	2.35197	5.69776	823.992	2.90907e-95	7.57427e-94
TBC1D2B	1.79314	5.94888	829.982	1.18749e-95	3.13568e-94
TBC1D3G	-1.69772	5.81724	334.158	2.48397e-53	1.8731e-52
TBX18	1.15866	5.60007	173.969	1.05313e-32	4.85281e-32
TBX19	1.22835	5.56076	248.962	4.83015e-43	2.85685e-42
TBX21	-1.06022	6.19224	1434.05	5.57688e-84	1.00797e-82
TCAM1P	-1.36802	5.87289	357.161	6.82539e-56	5.51549e-55
TCEAL4	1.10806	6.24758	2919.42	4.52909e-106	1.81322e-104
TCEAL7	-1.22826	6.40366	4687.1	4.44711e-129	5.51923e-127
TCF25	1.23836	6.14748	721.74	3.63672e-88	7.40926e-87
TCHH	-1.63144	6.41375	3444.99	6.90166e-187	1.46838e-183
TCL1A	-1.48903	6.09428	758.658	8.44155e-91	1.82999e-89
TDRD1	-1.50945	6.14213	546.701	2.61761e-74	3.50576e-73
TDRD12	-1.83451	5.86101	660.484	1.35271e-83	2.43014e-82
TDRD9	-1.12899	6.00125	578.007	5.59811e-77	8.07874e-76
TEX261	1.31985	6.1512	643.159	3.02751e-82	5.22465e-81
TFE3	3.16345	5.75996	1690.73	2.20011e-138	4.20081e-136
TGFA	1.10781	5.73994	243.419	2.52875e-42	1.46312e-41
TGFBR1	1.08337	6.154	723.373	2.76884e-88	5.65657e-87
TGM1	-1.33511	6.31335	2456.27	8.01586e-139	1.59174e-136
TGM3	-1.57751	6.15905	860.658	1.19353e-97	3.37292e-96
TGM5	-1.66435	6.16575	868.576	3.70916e-98	1.07055e-96
THAP4	1.28515	6.04909	995.193	7.27166e-106	2.88024e-104
THPO	-1.11679	6.26775	1004.08	6.61467e-98	1.89083e-96
THY1	1.84045	6.07102	1318.1	1.2453e-122	1.10394e-120
TIMELESS	1.1201	6.07993	716.102	9.22123e-88	1.85835e-86
TIMM44	1.1445	5.99086	173.708	1.15314e-32	5.31203e-32
TIPRL	2.84419	5.78484	801.137	1.00185e-93	2.43799e-92
TLE1	1.38403	5.95845	358.43	4.95717e-56	4.0189e-55
TLL2	-1.2141	6.2019	1876.62	1.45506e-107	6.245e-106
TLX1	-1.2913	5.70342	237.916	1.32823e-41	7.51857e-41
TM4SF19	-1.04346	6.04721	719.74	1.65407e-72	2.09474e-71
TM7SF4	-1.03243	6.01768	1005.23	1.96994e-69	2.26901e-68
TMEM132E	-1.21264	6.02806	960.024	4.69993e-93	1.11105e-91
TMEM161A	1.35503	5.92647	922.944	1.45385e-101	4.76921e-100
TMEM170A	1.26571	5.89814	604.53	3.61997e-79	5.5637e-78
TMEM182	1.66938	5.54917	333.708	2.77695e-53	2.09192e-52
TMEM199	1.39634	5.91309	834.434	5.94898e-96	1.58211e-94
TMEM213	-1.02272	5.7898	228.703	2.20998e-40	1.2154e-39
TMEM25	3.44814	5.67263	1189.19	2.286e-116	1.50644e-114
TMEM59	1.78828	6.16426	1566.11	1.889e-133	2.8707e-131
TMEM71	2.45324	5.18503	486.386	6.58928e-69	7.44568e-68
TMF1	1.77533	5.95739	518.772	7.48857e-72	9.29394e-71
TMPO	1.84007	5.9702	706.015	5.13129e-87	1.00818e-85
TMPRSS2	1.53243	5.74577	340.971	4.22401e-54	3.25275e-53
TMSB15A	-1.0144	6.20437	712.616	2.28884e-78	3.43626e-77
TMX2	1.27418	6.14725	589.807	5.90802e-78	8.79003e-77
TNF	-1.04391	6.35621	1688.4	3.60704e-93	8.59515e-92
TNFRSF9	-1.39114	6.30878	1584.91	3.26392e-134	5.1168e-132
TNNC1	-1.6442	6.11774	1416.99	3.8905e-127	4.32397e-125
TNNC2	-1.96419	6.17285	1742.01	2.61051e-140	5.71739e-138
TNNI1	-1.29752	6.39871	1829.57	1.79727e-141	4.24868e-139
TNNI2	-1.28115	6.14248	1207.01	1.55832e-112	8.34824e-111
TNNI3	-1.99016	6.18059	879.592	7.38989e-99	2.20999e-97
TNNI3K	-1.47854	6.30903	2210.34	4.25803e-156	2.43903e-153
TNNT1	1.47675	5.61166	271.744	6.26081e-46	3.99324e-45
TNNT3	-1.93264	6.3109	1221.07	5.89269e-118	4.17904e-116
TNR	-2.78847	6.17828	2185.48	2.46581e-155	1.31155e-152
TOP3B	1.08192	5.88838	686.19	2.30804e-75	3.1857e-74
TPH1	-1.77928	6.0077	924.818	1.13707e-101	3.75486e-100
TPM1	1.69062	6.16574	629.21	3.80494e-81	6.28237e-80
TPSD1	-1.05554	5.9338	255.748	6.5237e-44	3.93988e-43
TPST2	1.08087	6.00278	517.768	9.11781e-72	1.12503e-70
TRAP1	1.23113	6.15441	156.498	4.39514e-30	1.89455e-29
TRAPPC10	1.00812	6.15058	890.329	4.90248e-82	8.37302e-81
TRAPPC2L	1.50552	5.88201	424.91	5.54887e-63	5.34536e-62
TRDN	-2.64876	5.99204	1482.96	5.49332e-130	6.93322e-128
TRH	-1.36444	6.02211	401.738	1.25216e-60	1.13849e-59
TRIB3	1.10371	6.07138	286.34	1.00781e-47	6.68266e-47
TRIM55	-2.05144	5.91737	998.822	4.48432e-106	1.80014e-104
TRIM67	-1.34427	5.82013	906.367	2.73859e-93	6.58719e-92
TRNAU1AP	2.18679	5.65539	491.654	2.1457e-69	2.46574e-68
TROVE2	1.03732	6.15701	824.543	4.90747e-87	9.66759e-86
TRPM8	-2.06185	6.0715	1164.6	4.21272e-115	2.61417e-113
TSC1	3.60739	5.64279	1675.09	8.77654e-138	1.59401e-135
TSPAN15	1.99211	5.97403	446.289	4.30322e-65	4.35972e-64
TSPAN18	1.03074	5.96011	526.008	1.68332e-72	2.12996e-71
TSPAN31	2.60572	5.77948	787.053	9.09445e-93	2.12962e-91
TSPAN8	-1.42669	6.1947	463.585	9.27102e-67	9.86943e-66
TSSK3	-1.21392	6.36343	5476.78	1.82876e-122	1.58347e-120
TSSK6	-1.12939	6.3154	5374.3	9.14227e-104	3.24181e-102
TTC31	1.43101	5.90475	520.711	5.00459e-72	6.25805e-71
TTL	1.83341	5.86814	606.516	2.52546e-79	3.90162e-78
TTYH1	-1.07947	6.33495	613.493	6.8812e-80	1.09372e-78
TUBA1B	1.14548	6.45163	4674.52	6.54722e-133	9.37574e-131
TUBA3C	-2.18705	6.07484	930.572	5.07049e-102	1.6856e-100
TUBA3E	-1.27116	6.18939	565.33	6.62533e-76	9.26488e-75
TUBA4A	1.49961	5.93689	519.499	6.4492e-72	8.02405e-71
TUBB1	-1.14326	6.21708	2361.5	5.76005e-98	1.6497e-96
TUBGCP5	2.31297	5.67416	606.244	2.62624e-79	4.05312e-78
TXNIP	1.49006	6.27972	2571.88	1.9919e-166	2.28195e-163
TXNRD3IT1	1.40412	5.75189	272.819	4.62184e-46	2.95929e-45
TYRP1	-1.89958	6.16802	1083.39	8.33565e-111	4.1799e-109
UAP1	2.71593	5.87353	809.268	2.83818e-94	7.03312e-93
UBAC2	1.09263	6.14933	4144	2.20425e-95	5.75929e-94
UBE2E1	1.02679	6.16637	4403.23	4.98004e-86	9.5209e-85
UBE2L3	2.62403	5.87163	993.465	9.33772e-106	3.66931e-104
UBE2MP1	3.40827	5.32791	1436.48	5.41027e-128	6.24613e-126
UBE2N	1.38775	6.11207	458.133	3.08114e-66	3.24293e-65
UBE2V1	1.24175	6.21698	678.8	5.49999e-85	1.02261e-83
UBQLN1	1.54061	6.14475	402.858	9.59855e-61	8.78078e-60
UCP1	-1.23435	5.00739	68.533	2.44166e-15	6.64296e-15
UCP3	-1.13387	6.3353	5106.6	3.57985e-106	1.44484e-104
UGT1A6	-2.55665	5.94394	873.135	1.89925e-98	5.6122e-97
UGT2B15	-1.29884	6.26608	573.46	1.36279e-76	1.93479e-75
UGT2B28	-1.81732	5.7912	339.881	5.62458e-54	4.31344e-53
UGT2B4	-2.11994	6.03566	566.987	4.79447e-76	6.72354e-75
UGT3A2	-1.69144	6.07091	1007.57	1.43385e-106	5.94827e-105
UGT8	-1.17274	6.22873	603.896	4.12551e-79	6.32111e-78
ULBP2	-1.28928	6.30283	2079.02	1.38008e-129	1.72719e-127
ULBP3	-1.03082	6.01004	341.006	4.20658e-54	3.241e-53
UNC13A	-1.19235	6.25624	1715.06	6.83109e-109	3.12072e-107
UPK1A	-1.68903	6.00036	689.283	8.95662e-86	1.69925e-84
UPK3A	-1.50707	6.11475	1003.66	2.40663e-106	9.81973e-105
USH1C	-2.64021	6.16286	1669.74	1.45484e-137	2.61047e-135
UTRN	1.42651	6.09654	764.734	3.17072e-91	6.99578e-90
VAMP4	1.39739	5.88241	451.308	1.40125e-65	1.44121e-64
VAPA	1.00178	6.29309	946.823	5.89557e-91	1.28932e-89
VDAC2	1.54844	6.0303	1231.33	1.78769e-118	1.31153e-116
VGF	-1.28072	6.01449	772.674	8.75719e-92	1.98208e-90
VGLL1	-1.23644	6.14045	343.259	2.35437e-54	1.82623e-53
VIPR2	-1.10782	6.27746	658.303	2.01731e-83	3.59806e-82
VKORC1L1	1.49787	6.03665	987.845	1.94299e-105	7.51608e-104
VPS28	1.22383	6.17531	2533.29	1.86643e-120	1.48646e-118
VPS37C	1.02395	6.13427	802.881	2.27003e-83	4.03432e-82
VPS4A	1.14493	6.1494	1370.71	3.90636e-104	1.40187e-102
VRK2	1.33167	5.95158	616.505	3.88979e-80	6.20242e-79
VSTM2A	-1.5548	5.99679	277.762	1.13079e-46	7.32851e-46
VWA5B2	-1.58259	6.11907	1157.25	1.00894e-114	6.13313e-113
VWDE	-1.03128	6.08887	395.255	5.87412e-60	5.23539e-59
VWF	1.1636	6.22714	1542.14	2.34984e-114	1.38874e-112
WBP2	1.15715	6.22705	612.251	8.66678e-80	1.37167e-78
WDR1	1.47132	6.23431	1726.12	1.02953e-139	2.15954e-137
WDR17	-1.02493	6.11039	464.045	8.38059e-67	8.94069e-66
WDR26	1.07874	6.27575	1283.86	3.63781e-103	1.26289e-101
WDR31	1.23952	5.57622	240.492	6.09895e-42	3.48415e-41
WDR4	1.44831	5.73216	355.744	9.69957e-56	7.79578e-55
WDR72	-1.18109	5.92214	273.431	3.88098e-46	2.49028e-45
WDR89	1.56461	5.80701	439.709	1.88154e-64	1.87311e-63
WHAMML2	-1.05494	6.25792	3723.16	9.15173e-88	1.84684e-86
WIF1	-1.48945	6.01385	405.738	4.85602e-61	4.48918e-60
WIPF1	1.09055	6.11969	426.165	4.15693e-63	4.03055e-62
WISP3	-1.40893	5.95497	533.118	3.98486e-73	5.15161e-72
WNK3	-1.15066	6.13194	1217.54	1.87243e-92	4.34363e-91
WNT11	-1.12414	6.46924	2052.07	2.79829e-116	1.82785e-114
WNT6	-1.15884	5.96043	603.502	4.38964e-79	6.71891e-78
WNT9A	-1.03461	6.27403	1375.27	7.26147e-86	1.38293e-84
WSCD2	-1.29033	6.11293	1288.1	3.34182e-111	1.7103e-109
WT1	-1.46811	6.43603	899.895	3.92114e-100	1.22171e-98
WWP1	1.10513	6.23898	1141.6	8.20656e-105	3.06317e-103
XAGE1D	-3.03424	5.99206	930.321	5.25246e-102	1.7422e-100
XG	-1.14825	6.59048	3252.12	8.92211e-133	1.2655e-130
XIRP2	-3.5194	5.78806	1680.1	5.63102e-138	1.04828e-135
XK	-1.14602	6.39044	1756.61	4.70373e-113	2.61391e-111
YARS	1.02626	6.21597	1071.85	1.77942e-89	3.74835e-88
YIF1B	1.13213	6.03546	634.341	1.47503e-81	2.47105e-80
YIPF3	1.19314	6.21305	3802.66	1.78062e-118	1.31153e-116
YRDC	1.30843	5.88806	404.733	6.15867e-61	5.6723e-60
ZADH2	1.2556	6.02286	848.147	7.55566e-97	2.08769e-95
ZBED2	-1.27735	6.19002	988.33	1.8559e-105	7.19791e-104
ZBTB48	1.14901	5.90099	301.501	1.51817e-49	1.04242e-48
ZBTB7B	1.46675	6.10908	801.019	1.02054e-93	2.47944e-92
ZC3H12A	1.64171	5.76178	328.147	1.19802e-52	8.84148e-52
ZC3HAV1	1.29758	6.0828	1268.19	2.84887e-120	2.25682e-118
ZCRB1	1.25889	6.0394	329.393	8.63648e-53	6.40553e-52
ZDHHC6	2.86003	5.71785	768.921	1.61997e-91	3.61713e-90
ZFP36L1	1.5421	6.22692	1776.54	1.37468e-141	3.30211e-139
ZFP42	-2.96792	5.87155	1204.14	4.05804e-117	2.77231e-115
ZIC1	-1.38432	6.08193	386.557	4.77208e-59	4.16348e-58
ZIC2	-1.04607	5.95459	220.97	2.43117e-39	1.30102e-38
ZMAT4	-1.26282	5.96931	490.395	2.80361e-69	3.20939e-68
ZMYM3	1.03719	6.11768	579.985	3.86854e-77	5.60449e-76
ZNF207	1.49489	6.13919	793.811	3.14502e-93	7.53035e-92
ZNF280B	-1.21335	6.20826	1294.02	5.30092e-108	2.29496e-106
ZNF286B	3.3425	5.11847	667.258	4.09087e-84	7.44809e-83
ZNF295	1.60364	5.84621	369.02	3.51375e-57	2.91696e-56
ZNF43	1.25299	5.94928	320.486	9.07697e-52	6.55275e-51
ZNF445	1.24889	5.96974	1070.11	1.78805e-105	6.95285e-104
ZNF488	-1.02289	5.89995	438.986	6.61016e-62	6.20713e-61
ZNF529	1.09642	5.90788	235.208	3.03198e-41	1.70269e-40
ZNF606	1.03355	5.96065	843.416	1.66988e-73	2.18537e-72
ZNF774	1.15177	5.39869	211.504	4.74877e-38	2.47718e-37
ZNF782	2.28306	5.41909	454.964	6.16289e-66	6.42745e-65
ZNF880	1.08283	5.7163	288.193	5.97393e-48	3.97541e-47
ZPLD1	-1.37344	6.07115	822.84	3.49161e-95	9.02788e-94
ZRANB2	1.34697	6.06412	819.999	5.44443e-95	1.39081e-93
ZXDB	1.89053	5.79422	391.663	1.39105e-59	1.22803e-58
