# Supplementary material for: Molecular characterization of early breast cancer onset to understand disease phenotypes in African patients
Source: Med Oncol. 2022 Nov 9;40(1):13. doi: 10.1007/s12032-022-01877-8 (PMC9646617; doi:10.1007/s12032-022-01877-8)
Supplement: Supplementary file 4 — Supplementary file4 (XLSX 16 kb) [file 12032_2022_1877_MOESM4_ESM.xlsx]

## Sheet: Tabelle1
Symbol	Chr	Start	End	Abberation	q.value
PTGFR	1	78769568	79005434	0	0.0138282
PRPF38B	1	109234945	109244425	0	0.0138282
FAM19A3	1	113263041	113269857	0	0.000685573
ANO10	3	43396351	43733086	0	0
CNTN3	3	74311719	74570291	0	0
ZIC1	3	147111209	147228080	1	0.0790196
GPR87	3	151011891	151034740	1	0.0121376
P2RY12	3	151055168	151102600	1	0.0121376
SUCNR1	3	151591431	151602405	1	0.0121376
GFM1	3	158362067	158410364	1	0.000433806
PEX5L	3	179512746	179754841	1	0
ACAP2	3	194995465	195163807	1	0.000433806
PPARGC1A	4	23756664	23905712	0	0.00130969
CXCL5	4	74861359	74864496	1	0.0665604
CXCL2	4	74962752	74965010	1	0.0665604
EREG	4	75230860	75254468	1	0.0665604
NAAA	4	76831809	76862204	1	0.0665604
CXCL10	4	76942273	76944650	1	0.0665604
CDH6	5	31193857	31329253	1	0.000819552
SLC1A3	5	36606457	36688436	1	0.0260667
ARSB	5	78073032	78281910	0	6.53e-05
GLDC	9	6532464	6645650	1	0.0643245
SH3GL2	9	17579080	17797127	0	0.111067
ELAVL2	9	23690102	23826335	0	0.111067
CPEB3	10	93806449	94050844	0	0.00106173
TLL2	10	98124363	98273675	0	0.00436898
SLIT1	10	98757795	98945677	0	0.00436898
RRP12	10	99116115	99161127	0	0.00436898
ABCC2	10	101542489	101611949	0	0.0250001
DUSP5	10	112257596	112271302	0	0.00106173
DMBT1	10	124320181	124403252	0	0.0944352
GPR26	10	125425871	125454123	0	0.0944352
CTBP2	10	126676421	126849739	0	0.0944352
BBS1	11	66278077	66301098	1	0.0599186
ADIPOR2	12	1797740	1897844	1	0.0126199
LRTM2	12	1929433	1945918	1	0.0126199
FKBP4	12	2904119	2914576	1	0.102342
FOXM1	12	2966847	2986206	1	0.102342
SCNN1A	12	6456009	6486896	1	0.0126199
ATN1	12	7033626	7051484	1	0.0126199
KLRB1	12	9747147	9760482	1	0.102342
STK38L	12	27396901	27478892	1	0.0126199
DENND5B	12	31535157	31744031	1	0.0126199
OXGR1	13	97637973	97646984	1	0.055322
ZIC2	13	100634026	100639018	1	0.023215
ABHD12B	14	51338878	51371688	1	0.146549
FOXN3	14	89591215	90085493	0	0.0777523
CCDC88C	14	91737667	91884188	0	0.0777523
RYR3	15	33603163	34158303	0	0.00568364
PPP1R9B	17	48211104	48227991	1	0.000348804
CACNA1G	17	48638429	48704835	1	0
NME1-NME2	17	49230920	49249108	1	0
CLTC	17	57697219	57773671	1	0
RGS9	17	63133549	63223821	1	4.56e-05
TGM3	20	2276647	2321724	0	0.109508
CYP24A1	20	52769988	52790512	1	6.14e-05
CECR5	22	17618401	17646177	0	0.100884
SLC25A18	22	18043139	18073760	0	0.0340348
MYO18B	22	26138111	26427007	0	0.100884
SEZ6L	22	26565440	26779562	0	0.100884
TPST2	22	26921458	26992681	0	0.100884
