# Supplementary material for: Molecular characterization of early breast cancer onset to understand disease phenotypes in African patients
Source: Med Oncol. 2022 Nov 9;40(1):13. doi: 10.1007/s12032-022-01877-8 (PMC9646617; doi:10.1007/s12032-022-01877-8)
Supplement: Supplementary file 5 — Supplementary file5 (XLSX 52 kb) [file 12032_2022_1877_MOESM5_ESM.xlsx]

## Sheet: Tabelle1
Symbol	Chr	Start	End	Abberation	q.value	Log2FC
PTGFR	1	78769568	79005434	0	0.0138282	-1.12046
FAM19A3	1	113263041	113269857	0	0.000685573	-1.54892
CNTN3	3	74311719	74570291	0	0	-1.23514
PPARGC1A	4	23756664	23905712	0	0.00130969	-1.08031
SH3GL2	9	17579080	17797127	0	0.111067	-1.05414
ELAVL2	9	23690102	23826335	0	0.111067	-1.18573
TLL2	10	98124363	98273675	0	0.00436898	-1.2141
SLIT1	10	98757795	98945677	0	0.00436898	-1.48957
RRP12	10	99116115	99161127	0	0.00436898	1.14311
ABCC2	10	101542489	101611949	0	0.0250001	-1.34958
DMBT1	10	124320181	124403252	0	0.0944352	-1.64533
GPR26	10	125425871	125454123	0	0.0944352	-1.1024
RYR3	15	33603163	34158303	0	0.00568364	-1.03744
TGM3	20	2276647	2321724	0	0.109508	-1.57751
SLC25A18	22	18043139	18073760	0	0.0340348	-1.08343
MYO18B	22	26138111	26427007	0	0.100884	-1.31705
SEZ6L	22	26565440	26779562	0	0.100884	-1.64425
GFM1	3	158362067	158410364	1	0.000433806	1.07709
ACAP2	3	194995465	195163807	1	0.000433806	1.52146
NAAA	4	76831809	76862204	1	0.0665604	1.72706
CXCL10	4	76942273	76944650	1	0.0665604	1.12721
CDH6	5	31193857	31329253	1	0.000819552	1.39524
SLC1A3	5	36606457	36688436	1	0.0260667	1.62232
BBS1	11	66278077	66301098	1	0.0599186	1.14961
ADIPOR2	12	1797740	1897844	1	0.0126199	1.16385
FKBP4	12	2904119	2914576	1	0.102342	1.36164
FOXM1	12	2966847	2986206	1	0.102342	1.29371
SCNN1A	12	6456009	6486896	1	0.0126199	1.29038
ATN1	12	7033626	7051484	1	0.0126199	1.75579
STK38L	12	27396901	27478892	1	0.0126199	1.42333
DENND5B	12	31535157	31744031	1	0.0126199	1.31704
PPP1R9B	17	48211104	48227991	1	0.000348804	1.20221
NME1-NME2	17	49230920	49249108	1	0	1.13624
CLTC	17	57697219	57773671	1	0	1.07772

## Sheet: Tabelle2
Symbol	logFC
ABCA10	-1.66102
ABCA13	-1.05253
ABCA4	-1.11301
ABCC12	-1.79598
ABCC13	-1.01473
ABCC2	-1.34958
ABHD1	-1.04944
ABHD12B	-1.46276
ABHD14A	1.21914
ABL1	1.27652
ABP1	-1.16011
ACADL	-1.41508
ACAP2	1.52146
ACBD3	1.11179
ACCN1	-2.20097
ACE2	-1.48699
ACHE	-1.20862
ACP2	1.08496
ACPP	-1.55391
ACSL6	-1.07504
ACTA1	-1.73052
ACTC1	-2.07276
ACTG2	1.3193
ACTL8	-1.39807
ACTN2	-1.23003
ADAM15	1.25363
ADAM32	-1.08367
ADAM9	2.38136
ADAMTS8	-1.10029
ADCYAP1	-1.28977
ADH1C	-1.0306
ADIPOR2	1.16385
ADRA2B	-1.22991
ADRB1	-1.40621
AFP	-1.97375
AGAP1	2.20975
AGAP3	1.15247
AGAP4	3.3056
AGFG1	2.98477
AGGF1	1.8604
AGR2	1.08673
AGR3	1.64583
AGXT	-3.15845
AICDA	-2.8215
AIM1L	-1.05867
AIP	1.96569
AKR1B10	-1.33738
AKR1B15	-1.34002
AKR1D1	-2.79523
ALDH1A2	-1.01035
ALDH1A3	1.02897
ALDH3A1	-1.9549
ALDOA	1.45329
ALG11	-1.0287
ALG6	1.26871
ALOX15	-1.20972
ALOXE3	-1.48338
ALPL	1.08323
AMBP	-1.03188
AMMECR1	1.06086
AMPD2	1.50048
ANAPC1	2.03792
ANAPC7	1.19706
ANK1	-1.24133
ANKLE1	-1.12664
ANKRD1	-1.80842
ANKRD17	2.11134
ANO10	1.05178
AP1G1	2.21529
APOC2	2.18884
APOE	1.38702
AQP7	-1.15696
AQP9	-1.08404
ARFGAP2	1.30306
ARHGAP36	-1.36627
ARHGAP39	1.17768
ARMC10	1.38739
ARMCX2	1.15828
ARSB	1.55506
ARSE	-1.11644
ART4	-1.5467
ASAP1	1.19028
ASB8	1.28678
ASCL1	-1.73106
ASNA1	1.47204
ASTN1	-1.62147
ASXL1	1.39252
ATM	1.00499
ATN1	1.75579
ATOX1	1.31341
ATP1A3	-1.07193
ATP1A4	-1.54994
ATP1B3	1.5631
ATP2A1	-1.56342
ATP2B2	-1.66194
ATP2C1	1.24682
ATP6AP2	1.24747
ATP6V1B2	1.00485
ATP6V1G1	1.99736
ATP6V1H	1.77302
ATP8A2	-1.29241
AVPI1	2.37319
AZGP1	1.51694
B3GAT1	-1.44739
B4GALNT2	-1.61375
BAD	1.09194
BAG5	1.31407
BAI1	-1.00525
BAT2	1.10733
BBOX1	-1.04859
BBS1	1.14961
BCAN	-1.26875
BCAR4	-2.65547
BCL10	1.21601
BCL2L2	1.26684
BCL3	1.17631
BCL7B	1.00647
BEX1	-1.28529
BHLHE22	-1.0193
BLK	-1.50157
BLMH	1.4805
BMP3	-2.23529
BNC1	-1.11152
BNIP3L	2.19386
BPI	-2.13565
BRSK2	-1.54942
BTLA	-1.00195
C10orf10	1.31943
C10orf46	1.00301
C10orf82	-1.0606
C11orf66	-1.09197
C12orf51	1.03207
C12orf53	-1.25455
C12orf60	-1.06304
C13orf37	1.341
C14orf2	1.60007
C16orf63	1.17971
C16orf7	1.9515
C17orf56	1.53646
C18orf56	-1.12093
C19orf36	-1.19712
C19orf63	1.07679
C1orf103	1.26372
C1orf21	1.58909
C1orf226	1.06329
C1orf95	-1.20503
C2	1.93427
C20orf196	1.06296
C20orf199	1.3727
C20orf26	-1.38011
C21orf15	-1.43307
C21orf2	2.73205
C22orf30	1.28698
C2orf29	2.13149
C2orf55	1.25599
C3orf21	1.13096
C4orf3	2.99172
C4orf40	-2.75822
C4orf41	1.29169
C4orf7	-1.02592
C5orf13	1.64184
C5orf20	-1.03768
C5orf41	1.41047
C6	-1.44676
C6orf124	1.00855
C6orf129	1.58558
C6orf130	1.49295
C6orf145	1.10235
C6orf15	-1.87476
C6orf153	1.31333
C6orf176	-1.47893
C6orf211	1.02855
C6orf223	-1.02209
C6orf62	1.01437
C6orf89	1.24213
C7orf41	1.59305
C8orf34	-1.02071
C8orf83	1.10378
C9orf122	-1.13733
C9orf72	1.51964
C9orf91	1.10258
CA14	-1.50569
CA3	-1.32376
CABC1	1.09059
CACNA1G	-1.40641
CACNA1I	-1.00718
CACNB3	1.16857
CACNG1	-1.49368
CACNG6	-1.78126
CAD	3.45155
CADM2	-1.2111
CALM2	1.15649
CALML3	-1.07486
CALR	1.19694
CAMK1	1.21523
CAMK2D	1.23243
CAMK4	-1.07028
CAMP	-1.63679
CAMSAP1	1.19846
CAPN2	1.10122
CAPSL	-1.31622
CARTPT	-2.17227
CASKIN1	-1.02961
CASP14	-1.44666
CASP8	1.16338
CASQ1	-1.24764
CBS	2.13385
CCDC114	1.14749
CCDC129	-1.39484
CCDC144A	-1.1594
CCDC159	1.99577
CCDC61	4.20408
CCDC65	-1.15997
CCDC88C	1.03292
CCL11	-1.29824
CCL13	-1.39234
CCL20	-1.37201
CCNA1	-1.32826
CCNB3	-1.01912
CCNK	1.61958
CCT4	2.27488
CCT6A	1.68454
CD14	1.48131
CD151	1.16884
CD164	1.13523
CD177	-1.51442
CD40LG	-1.38427
CD72	-1.10025
CD74	1.12724
CD8B	-1.04682
CDC37	1.1569
CDCA7	1.01125
CDH10	-3.13494
CDH19	-2.44091
CDH6	1.39524
CDH7	-2.19115
CDR1	-1.41229
CECR5	2.34835
CEL	-1.14502
CELF5	-1.17626
CETN2	1.168
CFL2	1.52441
CFP	-1.18664
CFTR	-1.46818
CGA	-1.27586
CHCHD10	1.56077
CHEK1	1.96361
CHGA	-2.16579
CHGB	-1.29708
CHMP4A	1.43264
CHRDL2	-1.34682
CHRNA9	-2.35268
CHRNB2	-1.06239
CHST4	-1.76546
CHST6	-1.13749
CHURC1	2.01672
CIDEA	-1.58927
CKM	-2.12818
CKMT2	-1.60318
CLDN10	-2.13056
CLDN11	-1.02462
CLDN6	-1.81572
CLDN9	-1.18842
CLEC3A	-1.06264
CLTA	1.09206
CLTC	1.07772
CNGA1	-1.46325
CNN2	1.1268
CNNM1	-1.2933
CNOT6L	1.06247
CNR1	-1.61172
CNST	1.10867
CNTN1	-1.31712
CNTN3	-1.23514
CNTROB	1.02428
COCH	-1.29979
COL11A2	-1.28264
COL4A1	1.21474
COL4A4	-1.12536
COL4A6	-1.22627
COL6A3	2.89628
COL9A1	-2.50792
COL9A3	-1.08259
COMMD6	1.93852
COMMD9	2.14205
COX4NB	1.13818
CPA6	-1.93609
CPEB3	2.27761
CPLX2	-3.0471
CPSF1	1.16565
CPT1A	1.46453
CR1	-1.001
CR2	-1.43652
CREB5	2.29409
CREBBP	1.6436
CRHR1	-1.58506
CRIP2	1.117
CRISPLD2	1.2116
CROT	1.08082
CRTAC1	-1.03412
CRYM	-1.48837
CSAG1	-2.57597
CSAG3	1.33676
CSF2RA	2.5803
CSMD3	-2.77035
CSN2	-4.44742
CSN3	-3.14368
CSNK1G1	1.02157
CSNK1G3	2.32306
CSRP3	-3.98536
CST4	-1.20548
CST5	-1.81129
CST9	-1.20861
CSTA	1.86585
CSTB	3.03881
CTBP2	1.07598
CTH	-1.00611
CTLA4	-1.2351
CTNNBIP1	1.38771
CTNND2	1.92663
CTPS	1.10108
CTSC	1.64305
CTSG	-1.20505
CUBN	-1.03981
CUL5	1.12521
CUX2	-1.3524
CXADRP3	-1.21529
CXCL10	1.12721
CXCL2	-1.24362
CXCL5	-1.77936
CXCR5	-1.19074
CXorf57	-1.11294
CXorf61	-2.55477
CYC1	1.62403
CYLD	2.35792
CYP11A1	-1.20358
CYP24A1	-1.86626
CYP26A1	-1.16389
CYP2A7	-1.51221
CYP2J2	1.22639
CYP4F12	-1.07469
CYTL1	-1.13485
DAD1	1.24489
DAPK3	1.17889
DAPL1	-1.52148
DAPP1	1.07626
DCD	-2.09957
DCTD	1.59732
DCTN5	1.0049
DDC	-2.06747
DDIT4L	-1.01387
DDX18	1.07865
DDX24	1.82279
DDX3Y	-4.16947
DENND5B	1.31704
DGKD	1.02974
DHDH	-1.179
DHRS4L2	3.45009
DHRS9	-1.02333
DHX15	1.31696
DHX34	1.06284
DHX38	1.05741
DIO3	-1.37178
DIP2B	1.40496
DIP2C	1.13523
DLG3	1.61796
DLG4	1.15833
DLK1	-1.07574
DLX3	1.13139
DMBT1	-1.64533
DMC1	-1.02347
DMRT2	-1.19065
DNAH11	-1.61773
DNAI1	-1.27037
DNAJB1	1.02238
DNAJC14	2.41314
DNAJC3	1.29391
DNAJC4	5.22684
DNAJC5	1.31751
DNASE1L3	-1.44485
DNER	-1.35573
DNPEP	1.40346
DOC2B	-1.29664
DPYD	1.52432
DPYSL2	1.64013
DPYSL5	-2.30844
DRD2	-1.72804
DRG1	3.70534
DRP2	-1.0239
DSCAML1	-1.3549
DSG1	-1.96159
DSG2	1.14108
DUOXA1	-1.14361
DUSP5	1.35043
DUSP9	-1.59284
DYDC2	-1.42136
DYNC1I1	-1.10353
DYNLRB2	-1.207
DYRK2	2.75566
EDN3	-1.82396
EFHA2	-1.15855
EFHC2	-1.15951
EFHD2	1.21628
EHD2	2.60339
EHD3	1.46186
EHMT2	1.10137
EIF2AK2	2.41876
EIF2C4	2.9576
EIF3CL	4.15707
EIF3G	1.03233
EIF3H	1.73139
EIF3K	1.3124
EIF4G2	1.33639
ELAVL2	-1.18573
ELMO1	1.01568
EMB	1.59853
EMID2	-1.04503
EMP1	1.65524
EMX2	-1.22385
EN1	-1.0834
EPDR1	1.18383
EPHA8	-1.75336
EPHX2	1.82669
EPO	-1.99498
EPT1	1.27354
ERBB4	1.32836
ERCC1	1.56495
EREG	-1.34198
ERLEC1	1.35526
ERVFRDE1	-2.11637
ESRP2	1.03323
ESYT1	1.47439
ETAA1	3.40993
EWSR1	1.01197
EXOSC6	1.01766
EYA1	-1.44074
EYA4	-1.64791
FABP4	1.02395
FABP6	-1.87444
FAM102B	1.92141
FAM107B	1.20144
FAM114A1	1.48499
FAM134C	1.16598
FAM135B	-1.36717
FAM167A	1.15703
FAM168B	1.08169
FAM174A	1.15852
FAM177B	-1.67166
FAM181B	-1.45497
FAM184B	-1.09347
FAM189A1	-1.08489
FAM190A	2.83933
FAM19A3	-1.54892
FAM20A	1.3065
FAM21B	1.62578
FAM36A	1.01342
FAM3D	-1.1229
FAM54B	1.01588
FAM57B	-1.21803
FAM5B	-1.2314
FAM63A	1.13133
FANCB	-1.10348
FAS	1.27241
FBN1	1.17309
FBN3	-1.10685
FBXL7	1.32009
FBXO43	-1.03552
FBXW4	1.74576
FCGR3A	1.0386
FCGR3B	-1.45173
FCRLA	-1.19529
FEN1	2.22566
FGB	-1.65323
FGD1	1.43722
FGD4	1.07796
FGG	-2.40536
FGL1	-2.20458
FGR	1.1175
FIGF	-1.40829
FKBP4	1.36164
FKBP5	1.36387
FKBP9	1.78163
FLNA	1.17926
FMO4	-1.10448
FN1	1.0612
FNDC1	1.03629
FOXA3	-2.00667
FOXC2	-1.24344
FOXJ1	-1.21444
FOXM1	1.29371
FOXN3	1.7341
FUBP3	1.4484
FUS	1.6667
FUT6	-1.18421
FXYD1	-1.20178
FZD9	-1.47075
GAA	3.79155
GAB1	2.85565
GABBR2	-2.16927
GABRB3	2.74176
GABRP	3.89881
GAD1	-1.55756
GAL	-1.0227
GATA3	2.5341
GATA4	-1.72431
GATAD1	1.1147
GCDH	5.2001
GCM1	-1.5808
GCNT4	-1.01358
GDF5	-1.31999
GDPD2	-1.89058
GFM1	1.07709
GIPR	-1.45787
GJB6	-1.47866
GLDC	-1.04663
GLG1	1.29908
GLRA3	-1.81172
GLT25D2	-1.04128
GLTSCR2	1.90408
GMIP	3.40047
GNG3	-1.65357
GNL3L	2.32542
GNLY	-1.02254
GOT2	1.33701
GP1BA	-1.22402
GPD2	1.50411
GPIHBP1	1.16087
GPR109B	-1.06154
GPR110	-1.0104
GPR172B	-1.07578
GPR26	-1.1024
GPR37L1	-1.10711
GPR4	1.59722
GPR55	-1.20528
GPR75	-1.22352
GPR87	-1.07942
GPR88	-1.6896
GPRC5A	1.80935
GPX2	-1.38365
GRB14	1.26297
GREB1	1.25362
GREM1	4.16515
GRHL1	1.12384
GRIA3	-1.55601
GRIA4	-1.17525
GRIK1	-1.37145
GRIN1	-1.33255
GRIN2A	-1.12316
GRIN2C	-1.31188
GRINA	1.58131
GRM4	-1.19746
GRN	1.42533
GRPR	-1.10724
GRWD1	1.10587
GSN	1.94845
GSTA1	-1.66997
GSTA2	-2.32861
GTF2I	1.02365
GTF3A	1.08687
GUK1	1.17523
GYS1	1.17515
GZMH	-1.20656
GZMM	-1.28018
H19	1.04922
HABP2	-1.70201
HADHA	1.86863
HAMP	-1.12334
HAO2	-2.74545
HAUS3	1.05054
HBA1	-1.45392
HCFC1	1.17904
HDC	-1.2049
HEXA	1.17201
HINT3	1.18515
HIST1H2AE	-1.03118
HIST1H2BH	-1.34602
HIST1H3D	-1.21931
HIST2H2BF	1.06969
HIVEP3	2.04324
HLA-B	1.21108
HLA-L	-1.00514
HMGA1	1.84876
HMP19	-2.05047
HNF1A	-1.0683
HNF4G	-1.33214
HNRNPH1	2.03119
HNRNPH2	1.02387
HNRNPH3	1.10129
HNRNPK	1.44811
HNRNPU	1.25279
HNRPDL	1.03072
HORMAD1	-2.03602
HOXB13	-1.63231
HOXB2	1.04491
HP	-1.10138
HPD	-2.123
HPN	1.01291
HS3ST2	-1.02162
HSD11B1	-1.03295
HSD17B14	2.48667
HSD3B2	-2.53067
HSP90AB1	1.4124
HTR1D	-1.27378
HTR3A	-2.0313
IFFO2	1.11058
IGDCC3	-1.21496
IGF2BP3	-1.25421
IGFBP3	1.17803
IGSF3	1.25776
IKZF3	-1.01882
IL10RB	1.13503
IL12RB1	-1.04885
IL12RB2	-1.25556
IL1RL2	-1.07284
IL22RA2	-1.67804
IL24	-1.53935
ILK	1.20807
ILVBL	1.30778
INA	-1.80395
INCENP	5.44332
INE1	-1.04829
INO80C	1.31541
INSM1	-1.51584
INTS12	1.17585
IP6K3	-1.69658
IQCB1	1.23576
IRS4	-2.70643
IRX3	1.11947
IRX4	-1.45254
ITGB6	1.15095
ITGBL1	1.37895
ITIH2	-2.30226
ITM2B	1.27689
IVL	-2.54346
JARID2	1.46723
JSRP1	-1.3066
JUN	1.38586
JUNB	1.65627
JUND	1.73348
JUP	2.20777
KBTBD10	-1.01408
KCMF1	2.2231
KCNJ16	-1.59708
KCNK17	-1.30588
KCNQ3	-1.0178
KCTD1	1.12653
KCTD15	1.94146
KERA	-1.54412
KIAA0125	-1.16713
KIAA0319	-1.54495
KIAA0319L	1.20554
KIAA1267	1.07149
KIAA1984	-1.03546
KIF13B	1.46541
KIF17	-1.03914
KIF19	-1.44125
KIF1A	-1.39096
KIF3A	1.01488
KIRREL2	-1.88547
KLHDC8A	-1.08749
KLHL1	-3.47342
KLHL14	-1.27083
KLK12	-1.726
KLK13	-2.06772
KLK14	-1.58262
KLK2	-2.20433
KLK3	-2.32139
KLK6	-1.15418
KLK7	-1.13513
KLK8	-1.61577
KLRB1	-1.16219
KLRD1	-1.14951
KNDC1	-1.22612
KPNA2	2.02636
KPNA4	1.08491
KRBA2	1.0906
KRT1	1.40489
KRT13	-1.38993
KRT14	1.85465
KRT20	-3.40663
KRT6A	-1.13255
KRT75	-2.0798
KRT83	-1.9385
KRT86	2.72588
KRTCAP2	1.22168
LACRT	-1.65799
LALBA	-3.4874
LAMC1	1.29064
LBP	-1.28696
LCT	-2.32599
LDHA	1.60556
LEFTY2	-1.34752
LGALS2	-1.1018
LGALS7	-1.87521
LHFPL4	-1.86573
LILRA4	-1.14569
LILRB3	1.15509
LIN28A	-3.05506
LIN7A	-1.14427
LMCD1	1.12091
LMOD2	-1.98019
LMTK3	2.36956
LOC145783	1.09021
LOC152225	-1.46775
LOC153328	-1.20408
LOC283174	-1.05427
LOC285593	-1.45012
LOC286467	-1.19092
LOC338799	2.02296
LOC400696	-1.00948
LOC441869	4.14675
LOC643719	-1.14818
LOC647979	1.2157
LOC728264	2.48942
LOC728643	-1.01989
LPAR1	1.55571
LPAR3	-1.37348
LRCH4	1.10435
LRP1B	-1.29248
LRP5	1.83605
LRRC10B	1.1216
LRRC15	1.09182
LRRC47	1.11131
LRRIQ1	-1.18657
LRTM2	-1.03528
LSAMP	-1.301
LSM12	2.65076
LST-3TM12	-3.47588
LTA	-1.24891
LTA4H	1.17714
LTBP3	1.05293
LUM	1.19887
LY6D	-1.08502
LY6H	-1.66237
LY9	-1.05715
MACC1	1.31312
MAEL	-1.79596
MAF	2.81901
MAF1	1.05799
MAFB	2.61704
MAGEA1	-1.03231
MAGEA12	-3.08934
MAGEA2	-3.25988
MAGEA3	-2.66526
MAGEA4	-3.03637
MAGEA6	-2.42077
MAGEA9B	-2.8407
MAGEC1	-2.57764
MAGEC2	-2.88623
MAL	-1.18621
MAP1B	1.13582
MAP4	1.03908
MAPK4	-1.46176
MARCO	-1.05244
MARK2	1.18393
MAST1	-1.21717
MAT1A	-1.18197
MAVS	1.20593
MAZ	1.05859
MBD2	1.2524
MBTPS1	1.22273
MCCD1	-1.82442
METAP2	1.81708
METRNL	1.05216
MGAM	-1.45772
MGC2752	1.32636
MIB1	1.36599
MID1IP1	1.15472
MIER3	1.65317
MINK1	1.26691
MKL1	1.08723
MLC1	-1.53469
MMEL1	-1.03816
MNX1	-1.11332
MOCS3	1.85128
MOGAT2	-1.19373
MORN3	-1.06178
MOSPD3	3.50273
MPP7	1.00789
MS4A8B	-1.71706
MSLN	-1.06704
MT1A	-1.40188
MT1M	-1.10977
MTA1	1.50747
MTA2	1.86577
MTERFD2	1.36472
MTHFR	1.88251
MTIF2	1.38191
MTSS1L	1.36033
MUC13	-2.0454
MUC2	-1.83675
MUC21	-1.56815
MUC4	-1.55653
MUM1	2.25803
MYBPC2	-2.44526
MYCN	-1.32613
MYF6	-3.95869
MYH1	-2.76397
MYH2	-3.16457
MYH3	-1.19033
MYH7	-3.56349
MYH9	1.00711
MYL1	-4.80139
MYL2	-3.63851
MYL6	1.60968
MYO16	-1.42997
MYO18B	-1.31705
MYO1F	2.43339
MYPN	-2.20966
MYT1	-1.13263
N6AMT1	1.4993
NAA15	1.34858
NAAA	1.72706
NAP1L3	-1.08018
NARS	1.1121
NAT2	-1.85605
NAV1	1.36701
NBPF10	3.95355
NBPF15	1.366
NCAN	-2.07895
NCRNA00052	-1.27404
NCRNA00086	-1.09933
NCRNA00181	3.56818
NCRNA00188	1.98252
NDRG3	1.49094
NDST1	1.08164
NDUFV1	2.67687
NELL1	-2.60292
NENF	2.3876
NEURL4	1.2839
NFE2	-1.1129
NFX1	2.34554
NFYB	1.18172
NIPAL1	-1.01339
NKX2-2	-1.81526
NKX2-5	-1.63902
NKX3-2	-1.01384
NLE1	2.04402
NLRP5	-2.00485
NLRP7	-1.32485
NME1-NME2	1.13624
NMU	-1.49294
NNAT	-1.15209
NONO	1.47781
NOTCH3	1.11819
NOTCH4	1.02446
NPAS1	-1.16869
NPC1L1	-1.30512
NPHP3	1.5008
NPM1	1.25349
NPR3	-1.01042
NPY	-3.34259
NPY2R	-1.61865
NR2F2	1.66516
NR3C1	1.13421
NRAP	-2.30248
NRAS	2.18561
NRG1	-1.23159
NRK	2.18413
NRL	-1.03602
NRTN	-1.01265
NRXN1	-1.59728
NSMCE1	1.0734
NTNG1	-1.68783
NTRK3	-1.11041
NUDT16P1	1.39716
NUF2	1.5577
NUP43	1.3322
NXPH1	-1.1477
OBP2B	-1.48945
ODF2	1.20703
OGDH	1.69332
OGDHL	-1.69643
OLFM4	-1.16498
ONECUT2	3.16375
OPA1	1.07215
OPRK1	-2.40832
ORC2L	1.0147
OSBPL9	1.03371
OTX1	-1.25759
OVOL2	1.71427
OXGR1	-1.34803
P2RX2	-2.14539
P2RX7	-1.00234
P2RY11	1.04321
P2RY12	-1.07572
P2RY2	1.11406
PABPN1	1.06841
PADI3	-1.46356
PAFAH1B3	1.33272
PAH	-1.39958
PAR5	-1.28529
PARP1	1.38783
PARP14	1.17265
PART1	-1.38363
PAX1	-1.80244
PAX2	-1.07149
PAX7	-1.70038
PCBP2	2.21832
PCDH1	2.58301
PCDH10	-1.52195
PCDH9	-1.00105
PCDHA1	-1.14974
PCMT1	1.38094
PCNXL3	1.98103
PCP4	-1.65681
PCSK1N	-1.20074
PCSK2	-2.60447
PCSK9	-1.03338
PCYOX1	1.76511
PDCL	1.40679
PDHX	1.16401
PDLIM7	1.30169
PDPK1	1.07576
PDZK1P1	-1.00798
PDZRN4	-1.41456
PEBP4	-1.56451
PEX2	1.51878
PEX5L	-1.69651
PFN2	1.1654
PGC	-1.84043
PGLYRP2	-1.01801
PGM1	1.52517
PGRMC1	1.69036
PHEX	-1.02889
PHF21B	-1.71496
PHGDH	1.05098
PI3	-1.35514
PI4KA	1.08903
PICALM	1.3697
PIK3C2B	1.13746
PIK3C2G	-1.069
PIK3R2	1.31479
PIP4K2C	1.17584
PIP5K1A	1.03282
PLA2G10	-1.07973
PLA2G2A	-1.09732
PLA2G3	-1.5771
PLAC1	-1.3968
PLAC2	1.02894
PLAC8	-1.07189
PLAU	1.29602
PLEKHA7	1.0616
PLOD3	1.38041
PLXNA1	1.20624
PM20D2	1.0447
PNCK	-1.17378
PNLDC1	-1.25949
PNLIPRP3	-2.29964
PNMA3	-1.43552
PNMA5	-2.14729
PNMT	-1.34567
POLDIP2	1.00491
POLR2C	1.29119
POLR3H	4.92133
PPARGC1A	-1.08031
PPOX	1.05815
PPP1R9B	1.20221
PPP4R4	-1.27904
PRDM16	-1.07576
PRDM8	-1.02608
PRDX1	2.62511
PRELID1	1.62295
PRIMA1	1.03899
PRKRIR	1.02683
PRLR	1.18724
PROL1	-1.96079
PRPF38B	1.62105
PRSS21	-1.28854
PRSS33	-2.55236
PSCA	-1.00625
PSD	-1.0532
PSMD11	1.01428
PSMD5	1.25659
PSTPIP1	1.56354
PTBP1	1.31235
PTCH2	-1.15498
PTCHD1	-1.10937
PTGFR	-1.12046
PTH1R	-1.02711
PTPN13	1.20511
PTPRC	1.2566
PTPRZ1	-1.13845
PTTG1IP	1.5363
PVALB	-1.34198
PYCRL	1.04168
PYDC1	-1.19043
PYGM	-1.1031
PYHIN1	-1.0158
PYY	-2.28756
RAB11A	2.47654
RAB19	-1.02848
RAB21	1.04253
RAG1	-1.09829
RANBP3	1.80161
RAPGEF1	1.44574
RASAL2	1.01435
RASSF1	1.33232
RASSF7	1.39457
RBBP6	1.20226
RBM47	1.39232
RBM8A	1.0546
RDBP	1.8952
RELN	-1.29191
REM1	-1.08991
RERE	1.15024
RERGL	-1.38224
RFX5	1.0815
RGN	-1.16589
RGS9	-1.01516
RHBDD3	1.32634
RHCE	-1.08803
RIC8A	1.35811
RIOK3	1.26054
RIPK4	1.40224
RNASEL	1.46158
RNF11	1.41688
RNF13	1.05793
RNF185	1.12951
RNF38	1.24789
RNF4	1.45872
RNF44	1.50378
ROBO2	-1.52574
ROM1	-1.08504
ROMO1	1.07371
ROPN1	-1.25719
ROPN1B	-1.04668
RP1	-1.91749
RPL32P3	2.42354
RPL41	4.20908
RPL7L1	1.02545
RPP40	2.0808
RPS16	1.40455
RPS4Y1	-4.33193
RRAD	-1.02155
RREB1	1.1933
RRM1	1.40229
RRP12	1.14311
RRP9	1.12735
RSPH4A	-1.09781
RTBDN	-1.79538
RTN4RL1	1.06775
RUFY4	-1.13263
RUNDC3A	-1.50849
RWDD2B	2.24186
RYR3	-1.03744
S100A6	1.1408
S100A7	-1.01151
S100A7A	-1.45788
S100G	-3.54695
SALL1	-1.32933
SALL2	2.78794
SALL4	-1.15477
SAPS2	1.31674
SAR1A	1.14174
SBF1	1.02396
SBSN	-1.03174
SC5DL	1.29827
SCD	1.05855
SCEL	-2.43819
SCG3	-2.22965
SCGB2A1	-1.23523
SCGN	-1.94648
SCN3B	-1.01692
SCNN1A	1.29038
SCP2	1.53752
SCRG1	-1.67683
SCUBE1	-1.01388
SEMA3D	1.21371
SEMA5A	1.08551
SENP6	1.29473
SEPHS2	1.1313
SERF1A	1.29087
SERP1	1.15039
SERPINB2	-1.87855
SERPINB3	-2.39028
SERPINB7	-1.12427
SEZ6	-2.56347
SEZ6L	-1.64425
SFPQ	1.50927
SFRP4	1.84784
SFRS2IP	1.18961
SFTPA2	-1.19334
SFTPD	-1.09557
SGCG	-1.60578
SGSM3	1.1032
SH3D19	1.15154
SH3GL2	-1.05414
SHISA5	1.33374
SHROOM2	1.0628
SIAH1	1.51146
SIGLEC15	-1.17978
SIM1	-1.34044
SIPA1L2	1.43743
SIRPA	1.24284
SIRT1	1.38242
SIRT4	-1.09235
SIRT7	1.37832
SKIV2L	1.12527
SLC10A7	1.63899
SLC12A1	-1.49321
SLC12A2	1.10201
SLC13A2	-1.10198
SLC16A10	-1.10938
SLC16A7	-1.24882
SLC1A3	1.62232
SLC1A4	1.24625
SLC22A23	1.29005
SLC22A3	-1.19204
SLC23A1	-1.26423
SLC24A5	-1.19174
SLC25A10	1.91038
SLC25A18	-1.08343
SLC25A25	1.29834
SLC25A26	1.05632
SLC25A27	2.31658
SLC25A40	1.22135
SLC26A1	1.94297
SLC26A4	-1.21982
SLC26A7	-1.39858
SLC27A6	-1.25381
SLC2A12	1.40976
SLC2A14	-1.32384
SLC2A6	1.28829
SLC30A2	-1.38648
SLC35A4	1.01172
SLC35F3	-1.05393
SLC38A2	1.12416
SLC38A4	-1.28032
SLC3A1	-1.61294
SLC40A1	1.06735
SLC44A5	3.3211
SLC4A1AP	1.0671
SLC4A2	1.54045
SLC4A4	-1.06799
SLC6A11	-1.3766
SLC6A15	-1.69469
SLC6A16	-1.17556
SLC6A8	1.62351
SLC7A1	1.81249
SLC7A4	-1.30206
SLC8A1	1.0402
SLC8A2	-1.37636
SLC9A2	-1.03251
SLC9A5	-1.00307
SLCO4C1	-1.0436
SLIT1	-1.48957
SLITRK5	-1.30852
SLN	-2.32181
SMAD3	1.5762
SMAD4	2.46572
SMAD5	2.92826
SMAD6	1.93143
SMAD7	2.74611
SMAD9	1.25517
SMARCD1	1.22324
SMEK2	1.88178
SMYD1	-1.57622
SNAP25	-1.26818
SNORA8	1.58246
SNTB2	1.03273
SNX1	1.92479
SNX19	1.13211
SNX9	3.15097
SOD1	1.01613
SOSTDC1	-1.13294
SOX12	1.05564
SOX2	-1.6136
SPAG1	2.52422
SPAG17	-1.30467
SPAG6	-1.70282
SPANXA2	-3.52393
SPARC	1.22014
SPARCL1	1.14529
SPIB	-1.10754
SPIN3	1.5127
SPINK5	-1.60083
SPINK8	-1.37833
SPRR1A	-2.68647
SPRR3	-1.68287
SPTY2D1	1.14884
SRMS	-1.066
SSH2	1.01826
ST13	1.05181
ST5	2.6431
STARD10	1.42919
STAT6	1.15641
STC2	1.16123
STEAP2	1.31225
STIM2	3.10854
STK38L	1.42333
STOX2	-1.14703
STRC	-1.15507
STS	2.09836
STT3A	2.19966
STX10	1.7894
STX19	-1.50665
STXBP5	1.0236
SUB1	1.62035
SUCNR1	-1.41754
SULT1C2	-1.50114
SULT1C3	-2.75845
SULT4A1	-1.50791
SUN2	1.3336
SUPT6H	1.0936
SURF2	3.0638
SURF4	2.02213
SUV39H2	2.52775
SYCE2	-1.10824
SYNGR2	1.40951
SYNPO2L	-1.51757
SYP	-1.01064
SYT4	-3.82105
SYT5	-1.91429
SYT8	2.14584
SYTL3	1.43824
TAPBP	1.00104
TAS1R3	-1.118
TATDN1	2.35197
TBC1D2B	1.79314
TBC1D3G	-1.69772
TBX18	1.15866
TBX19	1.22835
TBX21	-1.06022
TCAM1P	-1.36802
TCEAL4	1.10806
TCEAL7	-1.22826
TCF25	1.23836
TCHH	-1.63144
TCL1A	-1.48903
TDRD1	-1.50945
TDRD12	-1.83451
TDRD9	-1.12899
TEX261	1.31985
TFE3	3.16345
TGFA	1.10781
TGFBR1	1.08337
TGM1	-1.33511
TGM3	-1.57751
TGM5	-1.66435
THAP4	1.28515
THPO	-1.11679
THY1	1.84045
TIMELESS	1.1201
TIMM44	1.1445
TIPRL	2.84419
TLE1	1.38403
TLL2	-1.2141
TLX1	-1.2913
TM4SF19	-1.04346
TM7SF4	-1.03243
TMEM132E	-1.21264
TMEM161A	1.35503
TMEM170A	1.26571
TMEM182	1.66938
TMEM199	1.39634
TMEM213	-1.02272
TMEM25	3.44814
TMEM59	1.78828
TMEM71	2.45324
TMF1	1.77533
TMPO	1.84007
TMPRSS2	1.53243
TMSB15A	-1.0144
TMX2	1.27418
TNF	-1.04391
TNFRSF9	-1.39114
TNNC1	-1.6442
TNNC2	-1.96419
TNNI1	-1.29752
TNNI2	-1.28115
TNNI3	-1.99016
TNNI3K	-1.47854
TNNT1	1.47675
TNNT3	-1.93264
TNR	-2.78847
TOP3B	1.08192
TPH1	-1.77928
TPM1	1.69062
TPSD1	-1.05554
TPST2	1.08087
TRAP1	1.23113
TRAPPC10	1.00812
TRAPPC2L	1.50552
TRDN	-2.64876
TRH	-1.36444
TRIB3	1.10371
TRIM55	-2.05144
TRIM67	-1.34427
TRNAU1AP	2.18679
TROVE2	1.03732
TRPM8	-2.06185
TSC1	3.60739
TSPAN15	1.99211
TSPAN18	1.03074
TSPAN31	2.60572
TSPAN8	-1.42669
TSSK3	-1.21392
TSSK6	-1.12939
TTC31	1.43101
TTL	1.83341
TTYH1	-1.07947
TUBA1B	1.14548
TUBA3C	-2.18705
TUBA3E	-1.27116
TUBA4A	1.49961
TUBB1	-1.14326
TUBGCP5	2.31297
TXNIP	1.49006
TXNRD3IT1	1.40412
TYRP1	-1.89958
UAP1	2.71593
UBAC2	1.09263
UBE2E1	1.02679
UBE2L3	2.62403
UBE2MP1	3.40827
UBE2N	1.38775
UBE2V1	1.24175
UBQLN1	1.54061
UCP1	-1.23435
UCP3	-1.13387
UGT1A6	-2.55665
UGT2B15	-1.29884
UGT2B28	-1.81732
UGT2B4	-2.11994
UGT3A2	-1.69144
UGT8	-1.17274
ULBP2	-1.28928
ULBP3	-1.03082
UNC13A	-1.19235
UPK1A	-1.68903
UPK3A	-1.50707
USH1C	-2.64021
UTRN	1.42651
VAMP4	1.39739
VAPA	1.00178
VDAC2	1.54844
VGF	-1.28072
VGLL1	-1.23644
VIPR2	-1.10782
VKORC1L1	1.49787
VPS28	1.22383
VPS37C	1.02395
VPS4A	1.14493
VRK2	1.33167
VSTM2A	-1.5548
VWA5B2	-1.58259
VWDE	-1.03128
VWF	1.1636
WBP2	1.15715
WDR1	1.47132
WDR17	-1.02493
WDR26	1.07874
WDR31	1.23952
WDR4	1.44831
WDR72	-1.18109
WDR89	1.56461
WHAMML2	-1.05494
WIF1	-1.48945
WIPF1	1.09055
WISP3	-1.40893
WNK3	-1.15066
WNT11	-1.12414
WNT6	-1.15884
WNT9A	-1.03461
WSCD2	-1.29033
WT1	-1.46811
WWP1	1.10513
XAGE1D	-3.03424
XG	-1.14825
XIRP2	-3.5194
XK	-1.14602
YARS	1.02626
YIF1B	1.13213
YIPF3	1.19314
YRDC	1.30843
ZADH2	1.2556
ZBED2	-1.27735
ZBTB48	1.14901
ZBTB7B	1.46675
ZC3H12A	1.64171
ZC3HAV1	1.29758
ZCRB1	1.25889
ZDHHC6	2.86003
ZFP36L1	1.5421
ZFP42	-2.96792
ZIC1	-1.38432
ZIC2	-1.04607
ZMAT4	-1.26282
ZMYM3	1.03719
ZNF207	1.49489
ZNF280B	-1.21335
ZNF286B	3.3425
ZNF295	1.60364
ZNF43	1.25299
ZNF445	1.24889
ZNF488	-1.02289
ZNF529	1.09642
ZNF606	1.03355
ZNF774	1.15177
ZNF782	2.28306
ZNF880	1.08283
ZPLD1	-1.37344
ZRANB2	1.34697
ZXDB	1.89053
